# Supplementary material
Source: PubMed Central journal article supplement (PMC10772599)
Supplement: qjad042_online_appendix.pdf [file qjad042_online_appendix.pdf]

# ONLINE APPENDIX

## Eviction and Poverty in American Cities

Robert Collinson, John Eric Humphries, Nicholas Mader, Davin Reed,  
Daniel Tannenbaum & Winnie van Dijk\*

---

\*Collinson: Department of Economics, University of Notre Dame ([rcollin8@nd.edu](mailto:rcollin8@nd.edu)). Humphries: Department of Economics, Yale University ([johneric.humphries@yale.edu](mailto:johneric.humphries@yale.edu)). Mader: Chapin Hall at the University of Chicago ([nmader@chapinhall.org](mailto:nmader@chapinhall.org)). Reed: Community Development and Regional Outreach Department, Federal Reserve Bank of Philadelphia ([davin.reed@phil.frb.org](mailto:davin.reed@phil.frb.org)). Tannenbaum: Department of Economics, University of Nebraska - Lincoln ([dtannenbaum@unl.edu](mailto:dtannenbaum@unl.edu)). Van Dijk: Department of Economics, Harvard University and NBER ([winnie\\_vandijk@fas.harvard.edu](mailto:winnie_vandijk@fas.harvard.edu)).

## Contents

---

|                                                                                       |               |
|---------------------------------------------------------------------------------------|---------------|
| <b>A APPENDIX: RECENT EVICTION REFORMS IN U.S. CITIES, COUNTIES, AND STATES</b>       | <b>iv</b>     |
| <b>B APPENDIX: INSTITUTIONAL DETAILS</b>                                              | <b>x</b>      |
| <i>B.A Eviction Rates Across Neighborhoods</i>                                        | x             |
| <i>B.B Time Trends in Eviction Filings, Orders, and Enforced Orders</i>               | x             |
| <i>B.C Rental Housing Markets and Local Housing Policies</i>                          | xii           |
| <i>B.D Court Procedures in Cook County</i>                                            | xii           |
| <i>B.E Court Procedures in New York</i>                                               | xvi           |
| <b>C APPENDIX: DETAILED DATA DESCRIPTIONS</b>                                         | <b>xviii</b>  |
| <i>C.A Court Records: Data Cleaning and Construction of Variables</i>                 | xviii         |
| 1 <i>Cook County</i>                                                                  | xviii         |
| 2 <i>New York</i>                                                                     | xviii         |
| <i>C.B Court Records: Sample Restrictions</i>                                         | xix           |
| 1 <i>Cook County</i>                                                                  | xix           |
| 2 <i>New York</i>                                                                     | xix           |
| <i>C.C Court Records: Construction of Case Outcomes</i>                               | xx            |
| 1 <i>Cook County</i>                                                                  | xxi           |
| 2 <i>New York</i>                                                                     | xxii          |
| <i>C.D Court Archive Microfilms for Cook County</i>                                   | xxiii         |
| <i>C.E Address Data Sources</i>                                                       | xxv           |
| <i>C.F CCS Codes for Mental Health</i>                                                | xxv           |
| <i>C.G Payday Loans Data</i>                                                          | xxvi          |
| <b>D APPENDIX: LINKED SAMPLE DETAILS</b>                                              | <b>xxxii</b>  |
| <i>D.A Cook County</i>                                                                | xxxii         |
| <i>D.B New York</i>                                                                   | xxxii         |
| <b>E APPENDIX: OUTCOME TRENDS AROUND COURT FILING: BY CITY AND ADDITIONAL RESULTS</b> | <b>xl</b>     |
| <b>F APPENDIX: ADDITIONAL EVIDENCE OF SELECTION INTO EVICTION COURT</b>               | <b>xliii</b>  |
| <b>G APPENDIX: ROBUSTNESS OF THE IV RESEARCH DESIGN</b>                               | <b>xlviii</b> |
| <i>G.A First Stage</i>                                                                | xlviii        |
| <i>G.B Exogeneity</i>                                                                 | li            |
| <i>G.C Exclusion</i>                                                                  | liv           |
| <i>G.D Monotonicity</i>                                                               | lix           |

|          |                                                                               |                |
|----------|-------------------------------------------------------------------------------|----------------|
| <b>H</b> | <b><i>Appendix: Additional IV results</i></b>                                 | <b>lxiii</b>   |
|          | <i>H.A Heterogeneity on Observables</i>                                       | lxiii          |
|          | <i>H.B The Impacts of Eviction 3-4 and 5-6 Years after Filing</i>             | lxix           |
|          | <i>H.C Additional Outcomes</i>                                                | lxxiv          |
|          | <i>H.D Reduced Form Estimates</i>                                             | lxxiv          |
|          | <i>H.E Number of Observations</i>                                             | lxxx           |
| <b>I</b> | <b><i>Appendix: Additional Outcomes: Attrition and Out-of-State Moves</i></b> | <b>lxxxiii</b> |
|          | <i>I.A Cook County</i>                                                        | lxxxiii        |
|          | <i>I.B New York</i>                                                           | lxxxv          |
| <b>J</b> | <b>APPENDIX: SYMMETRIC DIFFERENCE-IN-DIFFERENCES</b>                          | <b>lxxxix</b>  |
|          | <i>J.A Setup</i>                                                              | lxxxix         |
|          | <i>J.B Analysis</i>                                                           | xc             |
|          | <i>J.C Difference-in-Differences Estimates</i>                                | xcii           |

---

## A APPENDIX: RECENT EVICTION REFORMS IN U.S. CITIES, COUNTIES, AND STATES

This section describes a selection of pre-pandemic reforms to legal frameworks for eviction and tenant-landlord relations, as well as publicly-funded programs aiming to support tenants facing eviction at the city, county, and state level. Table [A.1](#) provides a summary of these reforms, with the most recent changes listed first. This section was last updated on July 13, 2019.

### 2019

**New York** On June 14, 2019, Governor Andrew Cuomo signed the “Housing Stability and Tenant Protection Act of 2019” (S.6458), which increases protections for tenants facing eviction and strengthens rent control statewide. Beyond making rent regulation permanent, the omnibus bill strengthens rent control in several ways, including: repealing policy that previously allowed landlords to significantly increase rent for vacant units, including high rent units in the scope of rent regulation, and restricting the permissible rent increase when landlords renovate an apartment or unit. The bill also expands tenant and eviction protections by banning tenant blacklists, establishing illegal eviction (e.g., locking tenants out), extending the time allotted for tenants to find a lawyer or pay unpaid rent, and allowing judges to stay eviction orders for a maximum of one year.

**California** In May 2019, the California State Assembly passed a bill (AB 1482) to strengthen rent control, and the California State Senate last amended the bill on July 11, 2019, to add restrictions on permissible causes for eviction. If passed, the bill will prohibit landlords from raising rent more than once each year. Also, the allowed rent increase would be capped at the lower of either 7 percent plus inflation (annual percentage change in regional CPI), or 10 percent of the lowest rental rate for the unit during the previous year. In addition to rent control, the bill includes a clause that prohibits landlords from evicting tenants without a “just cause” (AB 1481). Current state laws do not require landlords to have a specific cause for eviction, but 17 cities have already enacted city-wide provisions on “just-cause” eviction.

**Washington** On May 9, 2019, Governor Jay Inslee signed HB 5600, a bill aimed to protect tenants facing eviction. Once the bill is implemented on July 28, 2019, landlords will be required to provide tenants with a 14-day, instead of a 3-day notice when they default on rent payment. The notice must be written in plain language and include information on legal aid resources and court interpreter services. The bill also mandates that a tenant’s right to possession of his unit is conditional only on rent and not other monetary amounts (e.g., costs incurred by late payments, attorney fees, etc). Importantly, under HB 5600, judges will be given discretion to stay eviction orders up to 90 days after the judgment, for considerations such as whether the tenant defaulted on rent due to extraordinary circumstances. Separately,

**Table A.1: Recent Changes to Eviction Policy**

| Location          | Year | Summary                                                                                                                                                                                       | Implemented? |
|-------------------|------|-----------------------------------------------------------------------------------------------------------------------------------------------------------------------------------------------|--------------|
| New York          | 2019 | Bill 6458 extends rent control statewide; establishes stronger tenant protections (e.g., defining illegal eviction and allowing judges to stay eviction orders up to one year).               | Yes          |
| California        | 2019 | Bill 1482 establishes Universal Rent Control; prohibits landlords from eviction without “just cause”.                                                                                         | No           |
| Washington        | 2019 | Bill 5600 requires landlords to notify tenants 14 days in advance when there is a default in rent payment; Bill 1440 requires landlords to notify their tenants 60 days before rent increase. | Yes          |
| Mississippi       | 2019 | Bill 2716 eliminates the ten day grace period tenants were originally given to vacate their home.                                                                                             | Yes          |
| Virginia          | 2019 | Bill 2655 establishes a pilot eviction diversion program.                                                                                                                                     | No           |
| Oregon            | 2019 | Bill 608 implements Universal Rent Control.                                                                                                                                                   | Yes          |
| Philadelphia, PA  | 2019 | Bill 170854 requires “good cause” for evictions; tenants must be notified 30 days in advance.                                                                                                 | Yes          |
| Richmond, VA      | 2018 | Eviction Diversion Program                                                                                                                                                                    | No           |
| California        | 2018 | AB2343 extends the number of days tenants are given to remedy the cause for eviction and to respond to eviction court filings.                                                                | Yes          |
| Oakland, CA       | 2018 | Measure Y extends “just cause” eviction protections to tenants living in owner-occupied duplexes and triplexes.                                                                               | Yes          |
| North Carolina    | 2018 | S.224 allows landlords to recover attorney’s fees and filing fees incurred from a tenant during the eviction process.                                                                         | Yes          |
| Washington, D.C.  | 2018 | Eviction notices must have a set date, at least 2 weeks in advance; evictions will occur by changing the locks.                                                                               | Yes          |
| San Francisco, CA | 2018 | Proposition F gives all tenants the right to tax-funded legal assistance.                                                                                                                     | Yes          |
| Durham, NC        | 2018 | Eviction Diversion Program.                                                                                                                                                                   | Yes          |
| Santa Monica, CA  | 2018 | Provides protection from eviction during the school year for educators and families with school age children.                                                                                 | Yes          |
| Portland, OR      | 2018 | Ordinance 188849 requires landlords to pay renters’ moving costs when evicted without cause or due to a rent increase.                                                                        | Yes          |
| Philadelphia, PA  | 2018 | Philadelphia Eviction Project provides legal services for tenants facing eviction.                                                                                                            | Yes          |
| Denver, CO        | 2018 | Eviction legal defense program.                                                                                                                                                               | Yes          |
| Denver, CO        | 2017 | Mediation services, Landlord-Tenant Guide, and financial support to low- and moderate-income households in crisis.                                                                            | Yes          |
| Detroit, MI       | 2017 | Ordinance No. 33-17 prevents landlords from collecting rent if they haven’t passed city inspections.                                                                                          | Yes          |
| New York, NY      | 2017 | Intro. 214-B provides all low-income tenants facing eviction with legal representation.                                                                                                       | Yes          |
| Berkeley, CA      | 2017 | Tenant Protection Ordinance prohibits landlords from conducting evictions using misleading information or coercive conduct.                                                                   | Yes          |

*Notes:* This table summarizes proposed and implemented changes to eviction policy.

the governor signed HB 1440, which will also be implemented on July 28, 2019. This bill will require landlords to provide a 60-day, rather than 30-day notice if they plan to increase the rental rate.

**Mississippi** On March 22, 2019, Governor Phil Bryant signed SB 2716, a bill that amends the Mississippi Landlord-Tenant Act to reduce protections for tenants in eviction court. This bill will eliminate the ten day grace period tenants were previously given to vacate their homes once they were issued an eviction order. Prior to the amendment, tenants used this time to move out of their residences, or negotiate payment schedules with their landlords. Under the new law, tenants may petition for three days to vacate as long as the request is just and equal for both parties involved. If the tenants do not petition, they will be forced to move directly after the eviction judgment.

**Virginia** On March 12, 2019, Governor Ralph Northam signed HB 2655 into law, which aims to reduce the number of evictions at district courts in Danville, Hampton, Petersburg, and Richmond. Under the eviction diversion program, the court will order eligible tenants to pay back their landlords through monthly installments. The court will then dismiss the eviction order if and when the tenant satisfies the payment plan. To qualify for the program, tenants must not be in another eviction diversion program, and must not have missed their rent payment more than two times in six months or three times in 12 months. Proponents of HB 2655 argue that the program will help tenants who fall behind in their rent payments due to sudden job loss or medical emergencies. The program is scheduled to run on a trial basis from July 1, 2020 to July 1, 2023.

**Oregon** On February 28, 2019, Governor Kate Brown signed SB 608 into law, making Oregon the first state to implement Universal Rent Control. Now, landlords can only increase rent once a year, up to seven percent plus inflation, with some exceptions. Additionally, if a tenant lived in the unit for over a year, his landlord is prohibited from evicting him without cause. If a tenant has lived in a unit for less than a year, the landlord is able to end the month-to-month tenancy without cause, provided he or she gives the tenant a 30-day notice. Finally, to increase public accountability, the Oregon Department of Administrative Services is required to publish the maximum rent increase percentage annually.

**Philadelphia, PA** On January 22, 2019, Mayor Jim Kenney signed Bill 170854, which went into effect on April 22, 2019. The new law requires there to be a “good cause” to evict a tenant if the residential lease is less than a year. A few “good cause” reasons include: if the renter has not paid rent, has not followed the terms of the lease, or if there has been property damage. Additionally, even if the landlord has “good cause,” he or she must notify the tenant at least 30 days before the eviction date. Finally, the tenants then have the right to contest the “good cause” by filing a complaint with the Fair Housing Commission.

**Richmond, VA** In January 2019, Mayor Levar Stoney announced the initiation of the Richmond Eviction Diversion Program. Led by the Central Virginia Legal Aid Society, Housing Opportunities Made Equal of Virginia, and the city courts, the program promises to provide an array of services to tenants facing eviction. The planned initiatives include pro-bono legal representation in court, financial assistance for qualifying households, and a financial literacy campaign. This program is similar to existing ones in Durham, NC and Kalamazoo, MI.

## 2018

**California** Governor Jerry Brown signed AB 2343 into law on September 5, 2018. This bill amends the California Code of Civil Procedure Sections 1161 and 1167. It gives tenants three court days, instead of calendar days, to pay rent or comply with the other terms of the lease before landlords can proceed with eviction court filing. Additionally, tenants will have five court days to respond to the landlord's eviction court filing, after which the landlord can obtain an eviction order by default. This bill uses court days instead of calendar days to ensure that holidays and weekends are not counted under the tenants timeline to respond to the landlords eviction notice or breach of lease notice.

**Oakland, CA** On July 24, 2018, the Oakland City Council voted unanimously to add to the local ballot a measure aimed to amend limitations on Oakland's eviction law (Measure Y). With 58 percent voter approval, Measure Y was passed on November 6, 2018. The effects are twofold: first, it extends "just cause" eviction protections to tenants living in owner-occupied duplexes and triplexes. Second, it allows the city council to pass further limitations on landlords' right to evict without another election.

**North Carolina** SB 224 became law in June 2018, allowing landlords to recover "reasonable" attorney's fees incurred from a tenant during the eviction process. It also allows landlords to recover filing fees charged by the court, which is the cost to issue a summons for the tenant to appear in court. There are some restrictions on this measure, however. If the tenant owes back rent, the amount the landlord can recover must not be more than 15% of the rent owed. If they don't owe back rent, the amount recovered cannot be more than 15% of the monthly rent.

**Washington, D.C.** On July 10, 2018, the Council of the District of Columbia passed the Eviction Reform Emergency Amendment Act of 2018, which was enacted on July 26, 2018. The emergency act amends prior laws that required eviction notices to include a scheduled eviction date and be delivered to the tenant two weeks prior to that date. The act also places limitations on how the landlord handles and disposes of the tenant's personal possessions. For instance, rather than placing the tenant's property outside of the unit during the eviction process, the landlord is required to keep those belongings for at least seven days (excluding

Sundays and federal holidays). Finally, the act prohibits evictions when rain or snow is forecast.

Note that the emergency act expired on October 24, 2018. A temporary act with identical content was enacted on October 10, 2018 and became effective on November 27, 2018 (D.C. Law 22-183). Given the nature of temporary acts, the law is set to expire on July 10, 2019.

**San Francisco, CA** On June 5, 2018, San Francisco County voters passed Proposition F, a local ballot measure that gives tenants facing eviction lawsuits the right to tax-funded legal assistance. This program is estimated to cost the city \$4.2 million to \$5.6 million a year. Legal services are available to tenants either 30 days after they are served an eviction notice, or when they are served an unlawful detainer complaint. The program applies to renters of all income levels, not just low-income households.

**Durham, NC** On May 31, 2018, the Durham City Council voted to allocated \$200,000 to the Eviction Diversion Program led by the Civil Justice Clinic. The organization is a collaborative effort between Duke Law and Legal Aid of North Carolina. The program was launched earlier in 2017 and provides low-income tenants with legal representation in eviction court.

**Santa Monica, CA** On May 8, 2018, the Santa Monica City Council approved an ordinance that strengthens protections for educators or households with school-age children facing potential eviction. The ordinance prohibits a court from granting a no-fault eviction during the school year to the aforementioned types of tenants. A no-fault eviction usually occurs when a landlord wishes to occupy, renovate, or demolish the unit. This aims to prevent evictions from disrupting the school year for both students and teachers.

**Portland, OR** In March 2018, the Portland City Council passed Ordinance 188849 to permanently establish the tenant relocation assistance program. Under this amendment to the Residential Landlord and Tenant Act, landlords must pay their tenants' moving costs either if they are evicted without cause, or if they are forced to move due to a rent increase of 10 percent or more. The program existed for a year on a trial basis prior to March 2018.

**Philadelphia, PA** The Philadelphia Eviction Protection Project launched in January 2018. It provides new and improved legal services for tenants facing eviction, including legal assistance in the courtroom, a new tenant aid hotline, a website answering common legal questions, full-time service in a Landlord-Tenant Help Center in the courtroom, and financial counseling. Community Legal Services, along with a team of other local organizations, has been selected to implement the program. The program is a product of the Eviction Task Force, which was formed in 2017 to help come up with solutions to solve the city's eviction problem. The City Council allocated \$400,000 for the project, while the Department of Planning and Development allocated \$100,000.



**Denver, CO** In January 2018, thirteen Denver City Council members, through donations from office budgets and personal contributions, pooled together \$131,500 to help start the Eviction Legal Defense Pilot. Led by Colorado Legal Services, this program provides full legal representation for tenants who fall below 200 percent of the federal poverty standard. Attorneys are available either on site at the Denver County Court or at Colorado Legal Services. This pilot program was funded to last for six to nine months, but has been continued.

## 2017

**Denver, CO** In October 2017, Mayor Michael B. Hancock launched a series of programs aimed at reducing evictions, through several government departments and county courts. They created a Landlord-Tenant Guide, which clearly outlines the rights and responsibilities of both parties and provides a list of resources for conflict resolution before court action. The city also put mediation services in place to resolve landlord-tenant conflicts before and after the eviction process. Finally, the Temporary Rent and Utility Assistance (TRUA) program provides low- to middle-income tenants in danger of eviction with funds for utility payments and rent.

**Detroit, MI** In October 2017, the Detroit City Council passed Ordinance No. 33-17, which prevents landlords from collecting rent if they have not passed city inspections. The motivation for this amendment came from the low level of landlord compliance with lead inspection laws. Under the law, after a six-month phase-in period, tenants who live in units that have not passed inspections can put their rent in an escrow account for 90 days. If the landlord continues to refuse city inspection, the tenant can collect the escrowed rent after 90 days. Although most rental units must undergo annual inspection by law, the ordinance provides exceptions to compliant landlords who meet certain criteria.

**New York, NY** On August 11, 2017, New York Mayor Bill de Blasio signed Int. No. 214-B into law. The new law requires the implementation of programs to provide low-income tenants facing eviction with legal representation. Low-income is defined as households with gross incomes at or lower than 200 percent of the federal poverty standard. In addition, tenants of all income levels would be entitled to one legal consultation.

**Berkeley, CA** In March 2017, the Berkeley City Council passed the Tenant Protection Ordinance, which prohibits landlords from conducting illegal evictions using fraudulent/misleading information or intimidating/coercive conduct. Landlords are also prohibited from exploiting tenants on the basis of their immigration status and disabilities. Finally, landlords must now give a copy of the ordinance to tenants when they move in, and must also include it with any eviction notice.

## B APPENDIX: INSTITUTIONAL DETAILS

### B.A *Eviction Rates Across Neighborhoods*

Figure B.1 maps the eviction filing rate in 2010 by census tract. The eviction filing rate is calculated as the number of eviction cases filed in the census tract divided by the number of occupied rental housing units calculated from the American Community Survey.

Figure B.1: Neighborhood Eviction Filing Rates

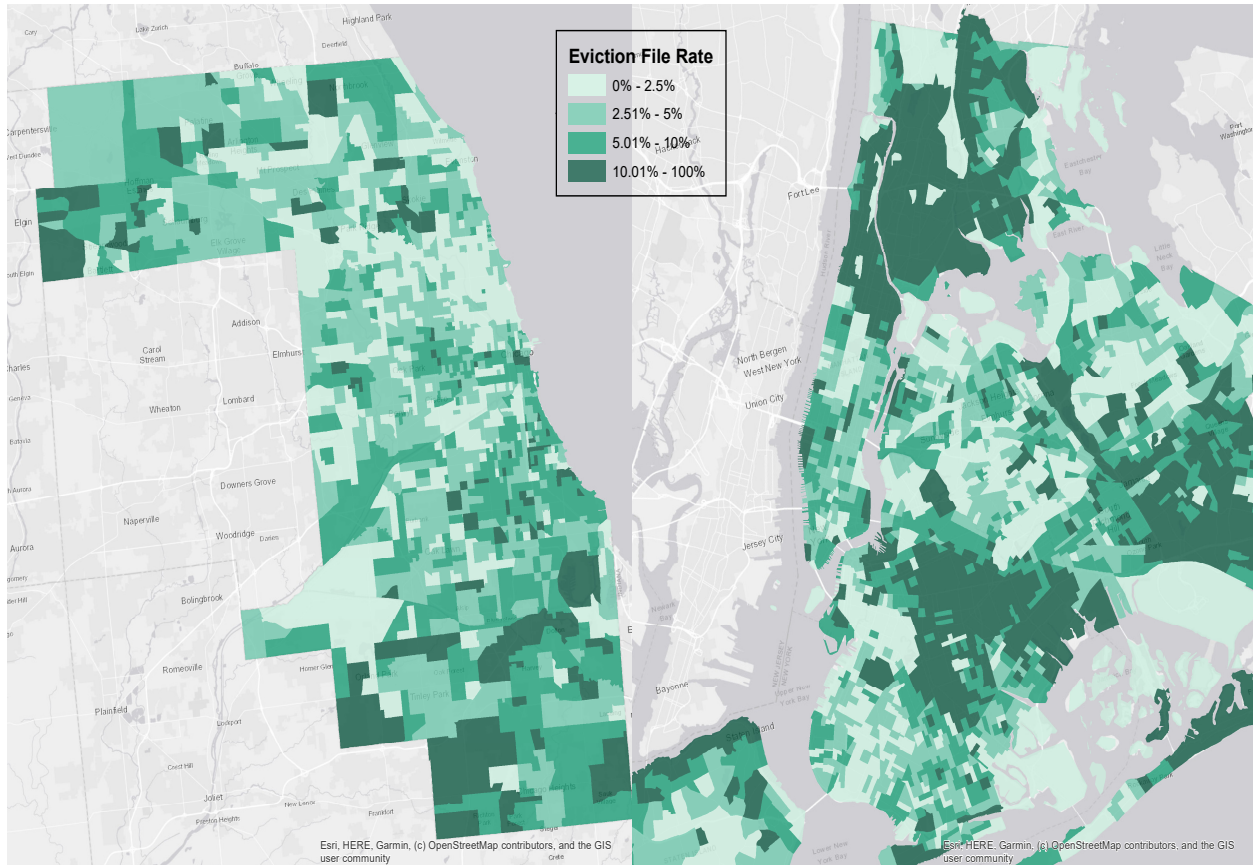

Notes: This map displays the census tract eviction filing rates in 2010: the number of eviction cases filed as a fraction of all rental occupied housing units (from the ACS 2006–2010). The overall eviction filing rate was 4 percent in Cook County and 11 percent in New York.

### B.B *Time Trends in Eviction Filings, Orders, and Enforced Orders*

Figure B.2 plots the number of eviction cases filed (top line), eviction orders (middle line), and enforced orders (bottom line) in Cook County (left panel) and New York (right panel).

**Figure B.2: Time Trends in Eviction Filings, Orders, and Enforced Orders**

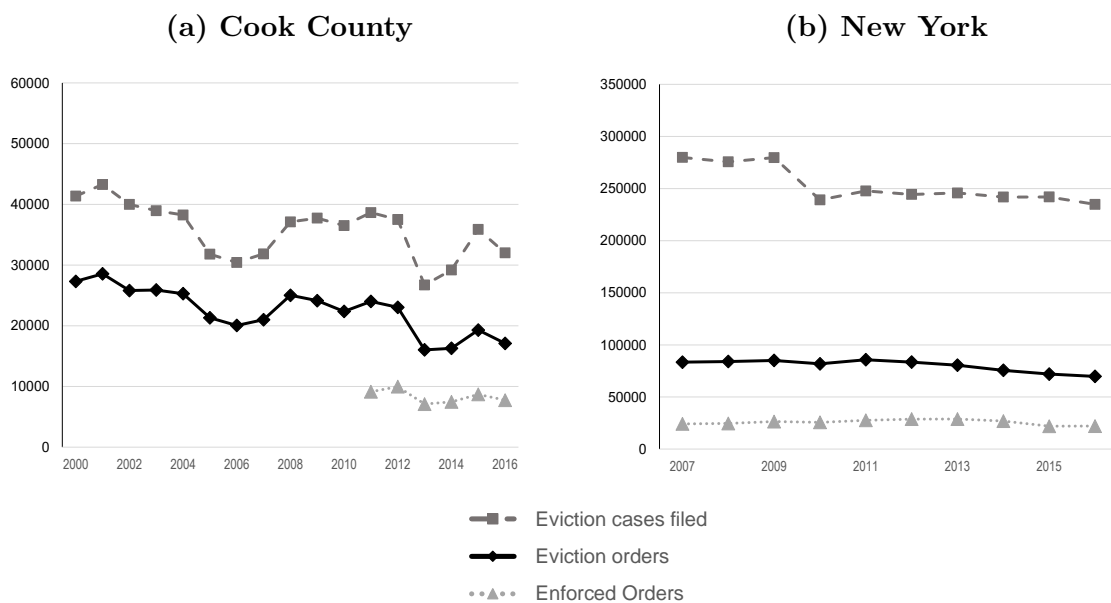

*Notes:* These figures display time trends in eviction filings, eviction orders, and enforced orders in Cook County (left) and New York (right). The counts of filings and eviction orders are based on the full, unrestricted samples of court records for both jurisdictions. The enforced order counts are based on data from the Sheriff’s Office (Cook County) and the Marshal’s office (New York).

## ***B.C Rental Housing Markets and Local Housing Policies***

We note a few salient features of the broader institutional settings in Cook County and New York that may be important for contextualizing our estimates of the impact of eviction. First, while most U.S. cities do not have rent control or rent stabilization policies, New York is among the few that do, while Cook County does not.<sup>1</sup> The presence of rent control or rent stabilization may affect landlords' incentives to evict as well as tenants' ability to find new housing if evicted (Diamond, McQuade, and Qian 2019). By studying these two locations, we capture both a more- and a less-regulated rental housing market and can examine differences in estimates across them (which we do in Section *VI.F*). Second, some housing assistance policies differ between the two jurisdictions. In particular, homeless shelter capacity or eligibility rules may play a role in determining post-eviction outcomes. New York has a right-to-shelter policy, which guarantees all individuals determined to be homeless access to shelter accommodations. In contrast, Cook County does not have right-to-shelter, and homeless individuals may be turned away from shelters that are at capacity.<sup>2</sup> In New York, less than 5 percent of the homeless are unsheltered, while in Cook County about a quarter of the homeless are unsheltered (Henry et al. 2019). As such, homeless shelter use may be more common among individuals who are evicted in New York, while in Cook County evicted tenants may be more likely to be unsheltered if homeless.

## ***B.D Court Procedures in Cook County***

**Relevant Legislation for Cook County.** The relevant legislation is recorded in two sources, the Municipal Code of Chicago Residential Landlords and Tenants Ordinance (RLTO), and the Illinois Compiled Statutes (ILCS). The RLTO applies only to Chicago (i.e., the first court district), while the ILCS apply to Cook County and thus also to Chicago. The RLTO trumps the ILCS in Chicago, but only when it is more strict towards landlords. For our data period, the most important parts of the legislation are the Forcible Entry and Detainer Act (735 ILCS 5/9) and the Civil Practice Act (735 ILCS 5/2).<sup>3</sup>

**Cook County Court Districts.** The Forcible Entry and Detainer Section of the Circuit Court of Cook County handles eviction cases. The court divides the county into six districts. Each district has its own court house with evictions courtrooms, and its own set of judges who handle eviction cases. Landlords must file eviction cases in the district in which the property is located. The vast majority of cases in our data come from the first court district, which handles cases relating to properties located in the City of Chicago. Figure *B.3* presents a map

---

<sup>1</sup>Other cities with some form of rent control or stabilization are Washington, D.C., and several cities in California, Maryland, and New Jersey.

<sup>2</sup>As of this writing, New York, Massachusetts, and Washington, D.C., have a right to shelter.

<sup>3</sup>The Forcible Entry and Detainer Act was replaced by the Eviction Act on January 1st, 2018. Our data set does not cover the Eviction Act's start date.

of the court districts. Our data set spans all six districts. In the paper and the remainder of this appendix, we refer to the Forcible Entry and Detainer Section of the Circuit Court of Cook County simply as ‘Cook County eviction court’ or ‘Cook County housing court’.

**Figure B.3: Administrative Districts of the Cook County Circuit Court**

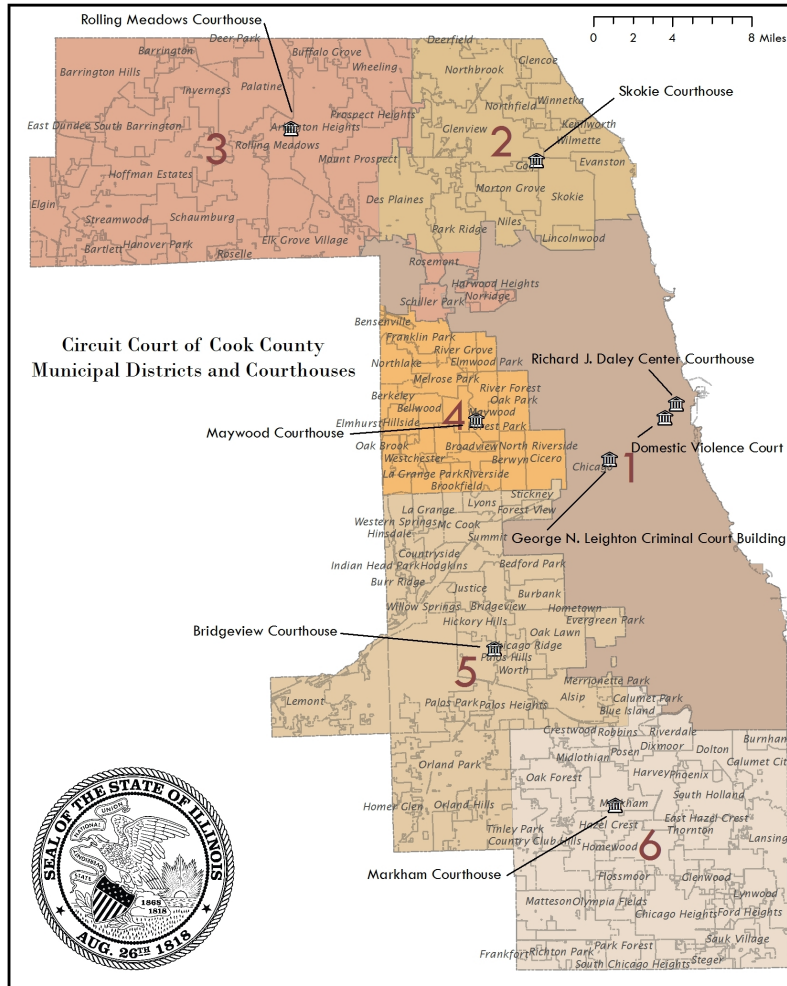

Map prepared on Aug. 8, 2012; Department of Geographic Information Systems, Cook County Bureau of Technology, cook\_muniJudic\_2012.pdf.  
 ©2012 Cook County Government  
 You are not permitted to repack, resell, or distribute this map without the written permission of the Cook County Board of Commissioners

*Notes:* This figure shows the six Municipal Districts that determine where landlords in our sample must file eviction court cases. District 1 serves the City of Chicago, district 2 serves the northern suburbs of Cook County, district 3 serves the northwestern suburbs, district 4 serves the western suburbs, district 5 serves the southwestern suburbs, and district 6 serves the southern suburbs. Source: <http://www.cookcountycourt.org/ABOUTTHECOURT/OrganizationoftheCircuitCourt.aspx>.

**Filing an Eviction Case.** After serving the proper notice to the tenant and waiting the required number of days, if the tenant has not yet vacated the premises the landlord may file for an eviction case. To file, the landlord (the plaintiff) or his attorney must provide the clerk of the Circuit Court of Cook County with a complaint form and a summons form and pay the filing fee.

On the complaint form, the plaintiff must provide the address of the tenant, the reason for claiming action, and, for joint action court cases, the amount of rent and/or compensation claimed for damages. Then, the sheriff serves the summons form to the tenant, which alerts him of the eviction court case as well as the date, time, and location of the hearing.

The filing fee depends on the court case type and varies over time. For joint action cases (for possession and rent) with claims for over \$15,000 in compensation, the cost was \$255 in 2000 and \$463 in 2016. For joint action cases with claims under \$15,000 or single action cases (for possession only), the cost was \$106 in 2000 and \$268 in 2016.

**Randomized Case Assignment.** Once the plaintiff submits the required eviction filing forms and pays the filing fee, they are given a range of dates from which to choose. These dates are usually between 2–4 weeks after the filing date and always on weekdays.

Once the clerk enters the date selected by the plaintiff, a computer program randomly assigns a courtroom and time to the case. Since each judge is designated to a specific courtroom, the random selection of courtroom and time effectively randomizes judge assignment. The process is analogous for plaintiffs who use e-filing. It is possible for the plaintiff to determine the judge who will be presiding over the assigned courtroom either by looking it up on the court website or by asking the clerk (either in person or by phone call). However, they cannot change the assignment by attempting to re-file or requesting a new date prior to the first hearing.

**Court Proceedings.** Except under rare circumstances, the landlord and/or his attorney will be present on the return date provided at the time of filing. Depending on whether the tenant was successfully served the court summons, the tenant may or may not be present in court on the return date. The landlord only finds out whether the defendant was successfully served on the return date. If the tenant is not present, the court will re-attempt to serve the tenant, usually through a special process server, and the landlord is given a new date to return to court. The judge will usually authorize multiple attempts at serving the tenant before deciding that a good-faith attempt at serving the tenant has been made and granting a default order for possession to the landlord.

If and when the tenant shows up to court, there are several courses of action they can pursue. They can request a continuance which delays the start of the case to give the tenant additional time to find an attorney or seek legal advice. If granted, the tenant is usually given one week to find legal assistance. At any point prior to the bench trial, the tenant can also request a trial by jury, and the case may be moved to a jury courtroom, which takes additional time. Alternatively, before moving to the bench trial, the landlord and tenant may agree to a settlement order.<sup>4</sup> This allows the landlord and tenant to negotiate certain binding conditions, which, if adhered to, result in the eviction case being dismissed. Typically,

---

<sup>4</sup>Examples of a settlement forms are available online, but not all settlement forms follow standardized formats, and formats have changed over time.

this involves the tenant agreeing to vacate the premises by a certain date and the landlord agreeing to dismiss the case, or the tenant agreeing to pay a certain amount by a certain date. If the tenant fails to fulfill the settlement conditions, the landlord can return to court and receive an immediate order for possession.

Finally, the landlord may dismiss the case for a variety of reasons. Common reasons include: the landlord realizes they made a mistake in the filing of the case, the tenant left the premises so the landlord no longer needs to obtain an order for possession, or the landlord and tenant came to an understanding outside of court. This typically results in the case being recorded as Dismissed by Plaintiff. If the landlord doesn't dismiss the case but simply fails to show up, the case is recorded as Dismissed for Want of Prosecution.

If none of the above occur, the case usually moves to a bench trial, in which both sides present their arguments and evidence in front of the judge. At that point, the judge makes a ruling to either grant an order for possession (and a money judgment for joint action cases) or to dismiss the case in favor of the tenant. Dismissal in favor of the tenant usually results in a dismissal with prejudice, which does not allow the landlord to re-file for the same reasons.

**After a Judge Grants an Order for Eviction.** After a judge grants an order for eviction, the judge can grant a “stay,” which gives the tenant a certain number of days before the landlord can file the order for eviction with the sheriff. Judges usually give a one-week stay. Additionally, before the eviction is carried out, the tenant may submit a motion to vacate to the Court asking the judge to vacate the eviction order, though this is rare.

Once the order has been entered and any stay periods have expired, the landlord may file the order for possession with the Sheriff's Office for a fee of \$60.50. The sheriff may enforce the eviction order by executing a lockout as soon as 24 hours after the landlord's filing. However, the median time between an order and a lockout, if it was executed, was 71 days in 2011–2016, based on data from the Cook County Sheriff's Office.

At any point leading up to the eviction, the landlord can cancel the eviction for a variety of reasons (e.g., the tenant already left the premises).

On the day of eviction, the landlord (or his/her representative) is required to greet the sheriff's deputy at the property with a locksmith alongside. Once papers authorizing the deputy's use of force (if necessary) are signed, the deputy enters the property and removes any occupants listed on the order.<sup>5</sup> Once the tenants have been removed, the landlord will change the locks to the door(s), completing the eviction process.

**Money Judgments.** If the landlord filed a joint action case, the judge must also decide if and how much the tenant owes the landlord for back rent and claimed damages.

In joint action cases, it is possible for the judge to grant the landlord an order for possession but no money order. In contrast, it is very rare for the landlord to obtain a money order

---

<sup>5</sup>If an occupant not listed on the order is on the premises, the deputy has to stop the eviction process and the landlord may have to file a new complaint seeking to evict the previously unnamed occupants. To avoid this, plaintiffs will commonly include “any and all unknown occupants” when filing an eviction case.

but no order for possession. If the tenant does not show up to court after being served the summons several times, the judge can often grant an order for possession, but the ILCS generally forbids the judge from making a money judgment in such situations.

Landlords can use a money judgment to obtain an order for garnishment of wages, tax refunds, or other assets, though wage garnishment requires getting an additional court judgment and is rare in practice.

## ***B.E Court Procedures in New York***

**Filing an Eviction Case.** Nonpayment cases in New York City’s housing court begin with a “Demand” by the landlord to the tenant for unpaid rent. The demand can be made verbally or in writing. If the demand is in writing, the landlord must wait three days before filing a case. After making a rent demand, the landlord must then file a notice of petition and purchase an index number with the Court to initiate a case. The cost of purchasing an index number was \$45 in New York City over our study period.

After the tenant has been served the notice by the landlord, the Court Clerk mails the tenant a postcard informing the tenant that they need to go to court to “Answer” the petition. The tenant has five days to answer, which involves coming to the clerk’s window at the courthouse, at any time during business hours, and submitting an answer form. The answer form provides the opportunity for the tenant to list possible defenses for nonpayment. Acceptable defenses include disputes about the rent claimed, improper service of the petition, or incorrect parties listed on the petition. Examples of rent defenses include: the tenant was not properly notified of the rent demand, the rent or a portion of the rent has already been paid, the requested rent is an overcharge because the tenant paid for necessary repairs or services, the tenant tried to pay but the landlord refused to accept it, and the requested amount of back rent is not the legal rent on the lease.

**Randomized Case Assignment.** After the tenant answers the petition at the courthouse, the case is assigned at random to a Resolution Part (the term given to courtrooms) by the Housing Court Information System (HCIS) computers. The assigned date is typically a week after the Answer is logged with the court. Judges rotate through courtrooms for year-long terms on a predetermined rotation system. Cases are assigned to courtrooms rather than judges, such that if the judge rotates out of a courtroom during an active case, the case will remain in the assigned courtroom.

**Court Proceedings.** If the tenant and landlord both appear on the initial court date, they typically first negotiate an initial settlement agreement known as a Stipulation of Settlement and log it in court records. The tenant may request to reschedule (adjourn) the case to procure legal counsel or buy themselves additional time to come up with money to pay off rental arrears. In the case of a Stipulation agreement, the landlord or, more typically, the landlord’s attorney and the tenant negotiate the terms of a possible settlement, haggling



over “time”—length of repayment period—or “money”—the amount of past arrears to be repaid. They may also negotiate whether a judgment is entered against the landlord, such as for required repairs. Tenants in New York City rarely agree to vacate the unit in a Stipulation agreement.<sup>6</sup> Negotiations between the tenant and the attorney may occur in a private conference with a Court Attorney (a non-partial court representative serving at the behest of a presiding judge in a given courtroom) or in the hall outside the courtroom.

Once an initial Stipulation agreement has been reached, the landlord’s attorney and the tenant appear before the judge presiding over that courtroom to present the settlement. The judge reviews the terms with the tenant and landlord (or landlord’s attorney), which may include discussing the tenant’s ability to meet the terms of the agreement or raising questions about the agreement, defenses, or counterclaims. If a settlement cannot be reached, the tenant can request a trial. If the judge approves a trial, the case will be reassigned to a trial part (courtroom) and tried that same day or scheduled to a new day. Trials are extremely rare, making up less than 1 percent of cases.

If the tenant fails to appear in court but the landlord appears, the judge may choose to issue a default judgment against the tenant, which, along with a warrant, can be used to evict the tenant.

A Stipulation may include a money judgment, a possessory judgment, or both. A money judgment allows the landlord to collect the specified amount owed. A possessory judgment allows the landlord to evict the tenant if the terms of the settlement are not met. In addition to a possessory judgment, a landlord will also need a warrant to have a City Marshal enforce an eviction order. If the tenant is able to pay the rental arrears owed, then judgment is said to be *satisfied* with the possessory judgment going away, thus avoiding eviction.

**After a Judge Grants an Order for Eviction.** With a possessory judgment and warrant, the landlord can hire a Marshal to execute a lockout.<sup>7</sup> The Marshal must serve the tenant a Notice of Eviction before conducting a lockout. The tenant has three days after receiving a Notice of Eviction before a Marshal can return to perform a lockout. However, the tenant still has recourse to avoid an eviction by filing a post-judgment Order to Show Cause (OSC), a request to halt an eviction and reopen the case. If the tenant files an OSC, the judge can choose to grant the request or deny the request to reopen the case.

The cost of hiring a Marshal to conduct a lockout is \$140 plus 5% of any money judgment collected. In New York City, a lockout can take two forms: an eviction or a legal possession (“possession”). Both involve removing the tenant and returning the property to the landlord. An eviction involves the removal of a tenant’s belongings (into private storage), and in the case of a possession, the tenant’s belongings remains under the care and control of the landlord until the tenant can arrange to retrieve them.

---

<sup>6</sup>Summers (2020) finds that just 1 percent of New York City cases result in a Stipulation where the tenant has voluntarily agreed to move out.

<sup>7</sup>In New York, County Sheriffs or City Marshals can conduct an eviction. However, in landlord-tenant cases nearly all landlords use City Marshals.

# C APPENDIX: DETAILED DATA DESCRIPTIONS

## *C.A Court Records: Data Cleaning and Construction of Variables*

### 1 *Cook County*

**Identifying Cases Involving Businesses and Unnamed Occupants.** Eviction court records include evictions involving tenants that are businesses as well as cases where the names of the occupants are not known. Similar to Desmond et al. (2018b), these cases are identified using regular expressions to select records in which the defendant’s name includes strings such as “LLC”, “LTD”, “CORP”, “INC”, “ASSOCIATES”, “DBA”, and other phrases associated with being a business. Similarly, we exclude cases where the only listed name is a variation of “ALL UNKNOWN OCCUPANTS” or the last name is “DOE”.

**Deriving the Assigned Judge.** When a case is filed, it is randomly assigned a court room and time, which determines the judge who will preside over the case. We assign judges to cases based on the room, time, and date assigned at the time of case filing. Note that this allows us to assign judges to cases even if the cases are withdrawn before the first hearing, which means our analysis is robust to strategic behavior, (e.g., if experienced plaintiffs were to withdraw after observing the judge assignment).

As a robustness check, we construct an alternative measure of judge stringency using the first court record involving a judge after the defendant has been served and excluding procedural events handled by the presiding judge. We find that this alternative construction assigns the same judge in more than 90 percent of cases.

**Standardizing Addresses.** We first checked addresses for common misspellings, typos, and formatting inconsistencies such as leading, lagging, or extra white space. We then processed addresses using the SmartyStreet address standardization API to return formatted and standardized addresses.

### 2 *New York*

**Identifying Cases Involving Businesses and Unnamed Occupants.** New York housing court records include a field identifying whether the party involved is a business or person. We remove all cases where the respondent (i.e., the tenant) is coded as a business. We also exclude cases where the the last name of the tenant is “DOE”.

**Standardizing Addresses.** We standardized addresses using HUD’s Geocoding Service Center, which uses Pitney and Bowes’ Core-1 Plus address-standardizing software.

## *C.B Court Records: Sample Restrictions*

### *1 Cook County*

Table C.1 reports the number of cases in the full sample, and how this numbers change as additional restrictions are imposed on the data. The first row reports the sample size for the full data set. Rows two through four impose that the case is not against a business, is not for a condo, is not missing names in the court docket, and has an ad damnum amount of less than \$100,000. We drop businesses as businesses because we are interested in impacts of eviction on residential tenants. We drop condos as they typically represent the eviction of condo owners, rather than renters. We drop cases with missing names or only "unknown occupants", as we are not able to link these cases. We drop cases with more than \$100,000 in damages, as there is a very small right tail involving very large damages, which we believe are a combination of entry errors and outlier cases. The fifth row imposes that a single judge can be clearly identified from the randomly assigned room and time. The sixth row imposes that the assigned judge saw at least 100 cases that year, while the seventh row imposes that the district had at least two active active judges seeing cases during the week of the initial hearing. These three restrictions help guarantee that we can identify the judge, that the judge sees a sufficient number of cases to accurately estimate stringency, and that there was more than one judge to which the case could have been assigned to. This final row corresponds to our "analysis sample" prior to linking to outcomes.

**Table C.1: Sample Construction for Cook County**

| Restriction                             | Cases   |
|-----------------------------------------|---------|
| None                                    | 583,874 |
| No businesses or condos                 | 555,167 |
| Non-missing names                       | 546,698 |
| Damages < \$100,000                     | 546,193 |
| Non-missing judge                       | 545,447 |
| Judge sees more than 100 cases per year | 483,200 |
| Valid Courtrooms                        | 413,976 |

Notes: This table provides a description of how the sample in Cook County changes as sample restrictions are applied.

### *2 New York*

Table C.2 reports the number of cases and how these numbers change as additional restrictions are imposed on the data. The first row reports the sample size for the full data set of non-payment filings in NYC. We restrict the sample to filings that become "calendared cases," which are cases that are heard by a judge and have the potential to render an eviction order. Cases that are never calendared are never assigned to a courtroom and hence don't

generate further court actions. We restrict the sample to cases involving residential property, excluding businesses because we are interested in impacts of eviction on residential tenants. Next, we drop cases arising in courts with only one judge (Staten Island) or in one of two specialized courts in Red Hook and Harlem, since we cannot construct the instrument for these cases. We require that the courtroom hears at least 500 total cases in a year, which results in a very small number of total cases being dropped. Functionally, this restriction drops courtrooms that are used only sporadically, which may feature non-random set of cases. Cases involving condos or co-ops are not randomly assigned to courtrooms. Within each court, these cases are assigned to a single courtroom. In all boroughs except the Bronx, this designated courtroom handles some non-condo/co-op cases; the average share of condo/co-op cases in these courts is 27 percent. We use annual administrative data from the New York City Department of Finance to identify buildings with condos or co-ops. Finally, we drop cases where the courtroom (and hence the judge) are not randomly assigned. These include cases involving the public housing authority, cases assigned based on zip code through several policy initiatives, and cases involving drugs or members/family members of the active military. The final row reports the number of possible observations that could be linked to either the benefits data or Experian data. After linkages, we further restrict the linked samples based on age and availability of identifiers to link to other outcomes.

**Table C.2: Sample Construction for New York**

| Restriction                           | Cases       |
|---------------------------------------|-------------|
| None                                  | 1, 826, 672 |
| Only calendared cases                 | 987, 320    |
| No businesses                         | 958, 814    |
| No Staten Island / Red Hook/ Harlem   | 903, 214    |
| Minimum 500 cases per year            | 899, 622    |
| No condos and coops                   | 830, 944    |
| No NYCHA (Public Housing)             | 638, 286    |
| No zip code assignment / other policy | 579, 084    |
| No drug and military cases            | 577, 851    |

Notes: This table provides a description of how the sample in New York changes as sample restrictions are applied.

### ***C.C Court Records: Construction of Case Outcomes***

In both jurisdictions, we define an eviction as a case *ending* with the judge issuing an eviction order. This definition includes instances when a tenant fails to meet the terms of an initial settlement and the judge ultimately issues an eviction order. It will also include cases where the tenant files an appeal to halt the eviction, but is unsuccessful. We focus on the last

recorded outcome on the docket for each case. We classify these terminal actions based on whether it returns the property to landlord, allowing an enforcement agency to execute a warrant. Below, we describe how we use court records to construct this classification.

## 1 *Cook County*

The court dockets include a detailed history of events and rulings associated with each case. Some events are administrative, while others involve court hearings. For each case, we take the history of events and establish whether the case ended in eviction. We define cases as ending in eviction if the case has a judge rule for any of the docket entries listed below and there is no dismissal recorded afterwards:

- “ORDER FOR POSSESSION”
- “ORDER OF POSSESSION”
- “JUDGMENT FOR PLAINTIFF”
- “JUDGMENT FOR POSSESSION ONLY(NO MONEY) - ALLOWED”
- “SHERIFF EVICTION WORKSHEET FILED”
- “EX PARTE JUDGMENT-PLAINTIFF”
- “VERDICT FOR PLAINTIFF BY PROVE UP”
- “JUDGMENT ON PRIOR VERDICT - FAVOR OF PLAINTIFF -”
- “VERDICT FOR PLAINTIFF”

We code the following entries as dismissals:

- “VOLUNTARY DISMISSAL W/LEAVE TO REFILE-ALLOWED”
- “DISMISS ENTIRE CAUSE - PLAINTIFF -”
- “DISMISS BY STIPULATION OR AGREEMENT”
- “DISMISSED FOR WANT OF PROSECUTION”
- “VOLUNTARILY DISMISSED BY PLAINTIFF”
- “CASE DISMISSED WITH PREJUDICE - ALLOWED”
- “CASE DISMISSED WITHOUT PREJUDICE -ALLOWED”

Finally, we code the following entries as verdicts for the defendant:

- “VERDICT FOR DEFENDANT”,
- “JUDGMENT FOR DEFENDANT”,
- “JUDGMENT ON PRIOR VERDICT - FAVOR OF DEFENDANT -”

Over 99 percent of cases that we classify as an eviction have an “ORDER FOR POSSESSION” ruling, and our results are robust to using alternate definitions of eviction. The procedure described above leaves 3 percent of cases unclassified, because there is neither a dismissal nor an eviction order recorded. We therefore classify these cases as not evicted.

In Section *C.D*, we randomly sample court microfilms stratified by dismissal type. Specifically, we draw at random from cases where the tenant was successfully served and where the case was determined to end in one of the following dismissal categories:

- *Dismissed by stipulation or agreement* (“DISMISS BY STIPULATION OR AGREEMENT”);
- *Dismissed with prejudice* (“CASE DISMISSED WITH PREJUDICE - ALLOWED”);
- *Dismissed without prejudice* (“CASE DISMISSED WITHOUT PREJUDICE -ALLOWED”);
- *Dismissed by plaintiff* (“VOLUNTARY DISMISSAL W/LEAVE TO REFILE-ALLOWED”, “DISMISS ENTIRE CAUSE - PLAINTIFF -”, “VOLUNTARILY DISMISSED BY PLAINTIFF”);
- *Dismissed for want of prosecution* (“DISMISSED FOR WANT OF PROSECUTION”).

## 2 *New York*

Court records in New York include a detailed history of hearings, motions, judgments, and warrants. An eviction order is coded as cases that end with a recorded warrant for eviction and a possessory judgment (“Judgment with Possession” ), where there are no records of successful appeal or satisfaction of the judgment afterwards.

Cases that do not produce an eviction order end with a discontinuance, a dismissal, or a settlement agreement. Discontinuances and dismissals most typically appear as cases ending with the outcomes:

- “Discontinued”
- “Withdrawn”
- “Dismissed No Appearance Plaintiff”
- “Dismissed No Appearance Either Side”
- “Dismissed via Conference”

Settlement agreements are common in New York non-payment cases. When cases end with a settlement, the settlement typically appears as:

- “Settled per Stipulation on record”
- “Settlement per Stipulation”
- “Settled Stip in File”

### ***C.D Court Archive Microfilms for Cook County***

The electronic court docket for Cook County, from which we collect our court data, does not contain all information that is included in underlying court archival records, which are stored on paper and on microfilm. For example, the Cook County dockets do not record whether there was a formal agreement between the landlord and the tenant associated with a dismissal. To provide a richer description of dismissed cases in Cook County and to be able to make a comparison to court outcomes for not-evicted cases in New York (where the presence of an agreement *is* recorded in the court data), we hand-collected and coded court microfilm records for a random sample of court cases ending in dismissal. This sample contains cases from the first district, which is Cook County’s largest—representing about 75 percent of case volume—and includes the City of Chicago.

For cases that do not end in an eviction order, the court docket records five main dismissal categories: *dismissed by stipulation or agreement*, *dismissed with prejudice*, *dismissed without prejudice*, *dismissed by plaintiff*, and *dismissed for want of prosecution*.<sup>8</sup> For each type of dismissal, we collected the microfilms for 100 randomly-selected cases, except for *dismissed for want of prosecution*, where we only collected 50 cases. We also collected 45 microfilms for cases that didn’t end in an eviction order but couldn’t be classified into a dismissal category, which we labeled *other*. Some of the randomly selected files did not have associated microfilms. The composition of our sample is as follows, where “missing” means there were no microfilm records available:

- *Dismissed by stipulation or agreement*: 100 cases, 4 missing;
- *Dismissed with prejudice*: 100 cases, 7 missing;
- *Dismissed by plaintiff*: 100 cases, 26 missing;
- *Dismissed without prejudice*: 100 cases, 14 missing;
- *Dismissed for want of prosecution*: 50 cases, 18 missing;
- *Other*: 45 cases, 20 missing.

---

<sup>8</sup>To determine the type of dismissal for each case, we group case outcomes according to the rules described in Section *C.C*.

For each case, all documents relevant to the terms of the dismissal were photographed at the courthouse and then manually reviewed by two researchers, with a third reviewer added if the two initial researchers' classifications did not agree.

**The Fraction of Not-Evicted Cases that Involve a Formal Agreement.** While the *dismissed by stipulation or agreement* category ostensibly records all cases that involve an agreement, the archival records show that there can be agreements in several of the other dismissal categories. To better compare between Cook County and New York, we compute the fraction of cases where the microfilms show some record of an agreement regarding either payment or moving out, for each of the six categories listed above. In cases where microfilms are missing, we assume they are missing at random. We then calculate a weighted average of these category-specific fractions with weights determined by the frequency of each dismissal category in the full sample of court records. This yields an estimate of 39 percent of not-evicted cases involving an agreement. This estimate may understate the fraction of cases that have an agreement, since it is possible that documents related to an agreement were not included in the microfilms and therefore coded as not showing evidence of an agreement.

**The Fraction of Cases that are Discontinued.** In the New York data, cases are classified as discontinued when the landlord withdraws the case or fails to show up for court (see Section *C.C*). To estimate the fraction of cases in Cook County that end in a similar way, we determine the fraction of cases in the *dismissed for want of prosecution* (the landlord or their lawyer fails to show up to court) and *dismissed by plaintiff* (the landlord asks the judge to dismiss the case) categories where the microfilms did not contain evidence of an agreement.<sup>9</sup> We also classify as discontinued cases where the tenant is never successfully served. Combined, this yields an estimate of 45 percent. This estimate likely overstates the number of discontinued cases, since our estimate of the fraction of cases with agreements is likely an underestimate, as explained above.

**The Fraction of Cases with a Verdict for the Defendant.** In New York cases are coded as “dismissed” when the case does not end in an eviction order, and the listed outcome is “Dismissed.” In Cook County, there are two types of cases that have outcomes that are conceptually similar. First, cases can be dismissed with prejudice and have no formal agreement.<sup>10</sup> Second, cases can end in a verdict for the defendant. In Cook County, 5 percent of cases fall into these two groups.

---

<sup>9</sup>Cases that indicate the landlord failed to show up yet have evidence of an agreement are likely to have been misclassified. Cases that are dismissed at the request of the landlord yet have an agreement are conceptually more similar to cases that end with an agreement.

<sup>10</sup>A dismissal with prejudice bars the landlord from bringing another eviction case with the same allegations against the tenant. A dismissal without prejudice does not, and is often accompanied by an agreement, and is therefore more similar to the stipulation agreement outcome in New York.



## C.E Address Data Sources

As discussed in Section III, to measure mobility in New York we combine two sources of address histories: consumer reference data from Infutor Data Solutions and administrative benefits records. We examine whether the availability of the New York moves data sources is correlated with eviction in Table C.3. In the top panel, we reports the results of regressing indicators of data source availability on an indicator for receiving an eviction order. Receiving an eviction order has small positive impact on the availability of any residential moves data (“Any Move Data”). Households receiving an eviction order are slightly more likely to have address data from benefits records but are slightly less likely to have Infutor data. In both cases, the relationship is small. In the bottom panel we report results from regressing indicators of data source availability on stringency. Stringency is uncorrelated with having any residential move data, and with the particular sources of the move data. This suggests that our primary mobility results from New York are unlikely to be affected by differential data availability. In Appendix I we examine how sensitive the New York residential mobility results are to using alternative definitions of moving depending on the source of moves data, and find that they are qualitatively similar across data sources.

**Table C.3: Move Data Source—New York**

|                | Move Data Availability         |                                |                                |
|----------------|--------------------------------|--------------------------------|--------------------------------|
|                | Any Move Data<br>(1)           | Any Benefits Data<br>(2)       | Any Infutor Data<br>(3)        |
| Eviction Order | 0.003*<br>( 0.002)             | 0.015***<br>( 0.002)           | -0.012***<br>( 0.002)          |
| Stringency     | 0.017<br>( 0.023)<br>[150,662] | 0.012<br>( 0.030)<br>[150,662] | 0.032<br>( 0.024)<br>[150,662] |

*Notes:* \*  $p < 0.1$ , \*\*  $p < 0.05$ , \*\*\*  $p < 0.01$ . This top panel of the table reports the results of separately regressing measures of move availability on an indicator for receiving an eviction order. The bottom panel reports results from regressing measures of move availability on a stringency. “Any Move Data” takes the value 1 if we have move data from Infutor or benefits data for a given tenant and 0 otherwise. “Any Benefits Data” takes the value 1 if we have benefits data and 0 otherwise. “Any Infutor Data” takes the value 1 if we have data on mobility from Infutor and 0 otherwise.

## C.F CCS Codes for Mental Health

Table C.4 lists the CSS codes used to classify if a hospital visit was mental health related. The first column lists the CSS code and the second column lists the diagnosis category name.

**Table C.4: CCS Codes Related to Mental Health**

| CCS Code | Single-Level Diagnosis Category Name                              |
|----------|-------------------------------------------------------------------|
| 650      | Adjustment disorders                                              |
| 651      | Anxiety disorders                                                 |
| 652      | Attention-deficit, conduct, and disruptive behavior disorders     |
| 653      | Delirium, dementia, and amnestic and other cognitive disorders    |
| 654      | Developmental disorders                                           |
| 655      | Disorders usually diagnosed in infancy, childhood, or adolescence |
| 656      | Impulse control disorders, NEC                                    |
| 657      | Mood disorders                                                    |
| 658      | Personality disorders                                             |
| 659      | Schizophrenia and other psychotic disorders                       |
| 660      | Alcohol-related disorders                                         |
| 661      | Substance-related disorders                                       |
| 663      | Screening and history of mental health and substance abuse codes  |
| 670      | Miscellaneous mental health disorders                             |

*Notes:* This table lists the CCS Codes used to determine whether a hospital visit is coded as related to mental health in the data on hospital visits that we describe in Section III, along with the category name. See [https://www.hcup-us.ahrq.gov/toolssoftware/ccs/CCSCategoryNames\\_FullLabels.pdf](https://www.hcup-us.ahrq.gov/toolssoftware/ccs/CCSCategoryNames_FullLabels.pdf) for a complete list of CCS codes and their diagnosis category labels.

### ***C.G Payday Loans Data***

The payday loans data, observed for Cook County only, comes from Clarity, a credit reporting agency that maintains the largest subprime database of over 62 million unique consumers and is owned by Experian. Clarity’s database includes only loans originating from lenders that use Clarity’s underwriting services. Payday lenders are not required to report loans to the credit bureau under the Fair Credit Reporting Act. Clarity collects data from alternative finance providers, including Online Installment, Online Small Dollar (Single Pay), Storefront Installment, Storefront Small Dollar (Single Pay), Title, Marketplace, Auto, Rent-to-Own, Telecom, Subprime Credit Card, and Collections Records. It is difficult to validate Clarity’s data, since a representative national database of payday loans is not available for comparison, but Miller and Soo (2020b) provide evidence in support of the comprehensiveness and quality of the data.

In our analysis we study payday inquiries, which are the borrower’s inquiry into getting a loan, and payday borrowing, which are the actual loans taken out. We present results for four outcomes: any inquiry, number of inquiries, any loan, number of loans. The majority of the payday loans in our data originate online. We observe payday loan inquiries for all months between September 2011 and November 2018, and loans for all months between January 2010 and November 2018. We only observe payday loan data for consumers who have a record in our main credit file.

Note that there may be one or many inquiries before a loan is underwritten, or there may

be a loan with no associated inquiries, which may occur for roll-over loans or in cases in which a borrower is well known to the lender. From the inquiries file, we keep only inquiries for new credit, which excludes soft inquiries and those due to collections or leases. In Table C.5, we show summary statistics of the payday loans data, for the Cook County linked eviction court sample, and for the 10 percent random sample of Cook County credit files, which is also linked to the payday loans data.

The summary statistics show that the vast majority of inquiries in the Clarity data are online rather than traditional storefront payday lenders. We note that online loans are likely over-represented in the Clarity database, since these lenders are more likely to require an external credit check prior to granting a loan. The average loan amount is lower for the eviction court sample, about \$1500, relative to \$2200 for the random sample. Most payday loans are for a short duration (less than one month), and the majority are short installment loans, in which the borrower makes multiple payments.

Figure C.1 presents event studies for payday inquiries and loans in Cook County. Panel A shows trends in the probability of making an inquiry into a payday loan, while panel B shows trends in the number of payday inquiries. Tenants in housing court have high levels of payday loan inquiries, even two years prior to filing, when about 3 percent of tenants have an inquiry each quarter. In the two years leading up to the eviction filing, there is a striking increase in demand for payday loans by both evicted and non-evicted tenants, with inquiries increasing from 3 percent per quarter to 4.4 percent per quarter, as seen in panel A. After the filing quarter, there is a sharp and immediate drop-off in payday loan inquiries, which may reflect less demand for liquidity—such as tenants finding less costly housing arrangements—or reduced supply of loans from creditors. Overall, these results suggest that the run-up to eviction filing coincides with a moment of acute financial strain on households, with tenants seeking short-run liquidity even at high interest rates.

In panel C, the dependent variable is an indicator for having a new payday loan in the corresponding quarter, while in panel D the dependent variable is the number of new payday loans. Both panels show an increase in payday borrowing in the run-up to eviction filing, with a steeper increase for non-evicted tenants. After the eviction filing, while payday borrowing falls for both groups, the non-evicted group has higher long-run levels of payday borrowing compared to the evicted group. The fact that inquiries fall in parallel following eviction court but borrowing remains higher for non-evicted tenants suggests that an eviction may have a negative effect on the probability of having a loan approved. Since the mean loan size is \$1535 and the number of payday loans per person in a given quarter is between 0.3 percent and 0.6 percent, individuals have about \$4-9 dollars of payday borrowing per quarter.

Table C.6 presents OLS and IV estimates of the impact of eviction on payday loan inquiries and borrowing. The results for payday inquiries show that evicted and non-evicted tenants have only minor differences in their likelihood of making a payday inquiry in the first and second years after filing, echoing the findings of the event studies, and the IV estimates are statistically insignificant and somewhat imprecisely estimated. The OLS estimates in the bottom two panels show that payday loan borrowing is lower for evicted tenants in the

first and second years after filing, again echoing the event studies. The IV estimates are statistically insignificant, with the exception of payday borrowing by women. For women, an eviction increases the likelihood of having a payday loan by 3.8 percent in the first year (a 165 percent increase relative to the baseline), and this effect is statistically significant at the 5 percent level. This effect is insignificant in the second year, diminishing to 1.8 percent, but this estimate remains economically meaningful.

**Table C.5: Payday Loans Data: Summary Statistics**

|                                         | Random Sample<br>(1)   | Eviction Court Sample<br>(2) |
|-----------------------------------------|------------------------|------------------------------|
| <b><u>Inquiries:</u></b>                |                        |                              |
| Online                                  | 0.85<br>(0.36)         | 0.89<br>(0.31)               |
| Storefront                              | 0.04<br>(0.21)         | 0.03<br>(0.18)               |
| Other Type of Inquiry                   | 0.11<br>(0.31)         | 0.07<br>(0.26)               |
| Number of Inquiries                     | 687,364                | 2,469,116                    |
| Number of Unique Individuals            | 78,957                 | 179,574                      |
| <b><u>Accounts:</u></b>                 |                        |                              |
| Amount                                  | 2,154.98<br>(3,388.13) | 1,535.61<br>(2,595.41)       |
| Single Payment, Duration $\leq$ 1 Month | 0.40<br>(0.49)         | 0.46<br>(0.50)               |
| Single Payment, Duration $>$ 1 Month    | 0.03<br>(0.16)         | 0.03<br>(0.18)               |
| Installment, Duration $\leq$ 1 Month    | 0.54<br>(0.50)         | 0.48<br>(0.50)               |
| Installment, Duration $>$ 1 Month       | 0.01<br>(0.08)         | 0.01<br>(0.09)               |
| Other Type of Account                   | 0.02<br>(0.14)         | 0.02<br>(0.14)               |
| Number of Accounts                      | 46,531                 | 126,372                      |
| Number of Unique Individuals            | 17,746                 | 47,626                       |

*Notes:* This table provides sample means and standard deviations of key variables in the payday loans database, for both the linked Cook County eviction court sample and the linked Cook County random sample. The top panel presents the sample of payday loan inquiries, and the bottom panel provides information on accounts opened, including the nominal amount of the loan, the duration of the loan, and whether the loan is to be repaid in one payment or in installments. The loan amount is the original amount of the loan and excludes fees and interest payments. Payday inquiries are available between September 2011 and November 2018, and account openings are available between January 2010 and November 2018.

Figure C.1: Event Studies: Payday Inquiries and Loans

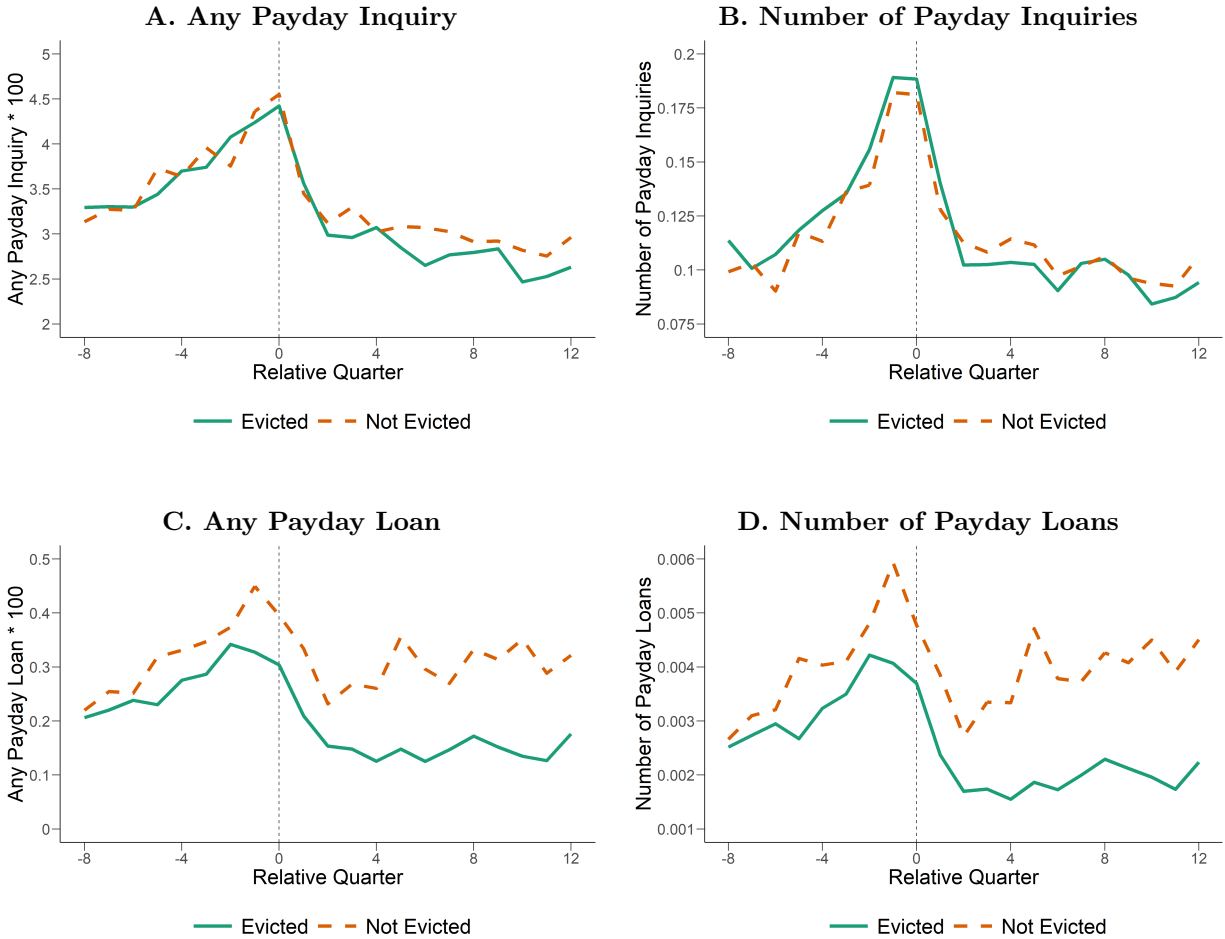

*Notes:* This figure plots trends in payday inquiries and loans relative to eviction filing in Cook County. We estimate equation IV.1 and plot results for the evicted and non-evicted groups in each time period. The only controls are calendar year dummies. For both sets of coefficients, we add in the non-evicted group mean in the omitted period so that the magnitudes are easy to interpret. All outcomes are measured at a quarterly frequency.

Table C.6: Impact on Payday Inquiries and Loans

|                                                    | 1-4 Quarters After Filing    |                      |                              | 5-8 Quarters After Filing    |                      |                                |
|----------------------------------------------------|------------------------------|----------------------|------------------------------|------------------------------|----------------------|--------------------------------|
|                                                    | $\mathbb{E}[Y E = 0]$<br>(1) | OLS<br>(2)           | IV<br>(3)                    | $\mathbb{E}[Y E = 0]$<br>(4) | OLS<br>(5)           | IV<br>(6)                      |
| <b>Any payday inquiry <math>\times 100</math>:</b> | 11.70<br>(32.14)             | -0.04<br>(0.23)      | 0.79<br>(3.64)<br>[75,608]   | 11.57<br>(31.98)             | -0.19<br>(0.20)      | 0.98<br>(3.21)<br>[91,571]     |
| <i>By Group</i>                                    |                              |                      |                              |                              |                      |                                |
| Female                                             | 12.14<br>(32.66)             | 0.12<br>(0.32)       | 5.92<br>(4.18)               | 12.05<br>(32.56)             | -0.23<br>(0.27)      | 5.64<br>(4.48)                 |
| <b>Number of payday inquiries:</b>                 | 0.606<br>(3.495)             | 0.014<br>(0.025)     | 0.158<br>(0.399)             | 0.594<br>(3.505)             | -0.001<br>(0.024)    | 0.495<br>(0.378)               |
| <i>By Group</i>                                    |                              |                      |                              |                              |                      |                                |
| Female                                             | 0.636<br>(3.448)             | 0.055<br>(0.037)     | 0.525<br>(0.484)             | 0.637<br>(3.609)             | 0.010<br>(0.030)     | 0.545<br>(0.578)               |
| <b>Any payday loan <math>\times 100</math>:</b>    | 1.382<br>(11.676)            | -0.297***<br>(0.074) | 1.221<br>(1.166)<br>[99,570] | 1.509<br>(12.193)            | -0.344***<br>(0.062) | -1.073<br>(1.505)<br>[115,404] |
| <i>By Group</i>                                    |                              |                      |                              |                              |                      |                                |
| Female                                             | 1.448<br>(11.947)            | -0.261***<br>(0.093) | 3.837**<br>(1.624)           | 1.559<br>(12.388)            | -0.336***<br>(0.089) | 1.805<br>(1.667)               |
| <b>Number of payday loans:</b>                     | 0.021<br>(0.223)             | -0.004***<br>(0.001) | 0.010<br>(0.023)             | 0.025<br>(0.263)             | -0.006***<br>(0.001) | -0.016<br>(0.032)              |
| <i>By Group</i>                                    |                              |                      |                              |                              |                      |                                |
| Female                                             | 0.022<br>(0.230)             | -0.004**<br>(0.002)  | 0.059**<br>(0.026)           | 0.027<br>(0.273)             | -0.007***<br>(0.002) | 0.023<br>(0.035)               |

Notes: \*  $p < 0.1$ , \*\*  $p < 0.05$ , \*\*\*  $p < 0.01$ . This table reports the non-evicted sample means ( $\mathbb{E}[Y|E = 0]$ ), OLS (OLS) estimates and two-stage least squares (IV) estimates of the impact of eviction on payday inquiries and loans, for Cook County only. Outcomes are listed on the left of each row. Results are shown for 1-4 quarters (columns (1)-(3)) and 5-8 quarters (columns (4)-(6)) after the eviction case is filed. Each panel shows results for a given outcome, and results for the female subsample. Controls for all model specifications are the same as those described in Table IV, except we do not control for race, which is not included in the data provided by the credit bureau. Standard errors for regression model coefficients are included in parentheses and are clustered at the judge-year level. Observation counts for the full specification of “Any payday inquiry” and “Number of payday inquiries” are listed in columns (3) and (6) of the “Any payday inquiry” panel, in brackets under the standard errors, and observation counts for the full specification of “Any payday loan” and “Number of payday loans” are listed in columns (3) and (6) of the “Any payday loan” panel, in brackets under the standard errors. Observation counts for all outcomes and specifications are in Appendix Table H.15.

## D APPENDIX: LINKED SAMPLE DETAILS

### *D.A Cook County*

Individuals in our Cook County eviction records are assigned unique identifiers (PIKs) by the U.S. Census Bureau, based on names and addresses contained in the court records. We link individuals by their PIKs to earnings, employment, and homelessness outcomes contained in Census data sets. Table D.1 reports estimates from a regression of an indicator for an individual being successfully assigned a PIK on case characteristics. The case characteristics include indicators for race (predicted from census tract and last name), gender (predicted from first name), an indicator for the tenant being without an attorney, and an indicator for the case outcome being an eviction order. We find that cases ending in an eviction and cases in which the tenant does not have an attorney are less likely to be assigned a PIK. Cases with white or Black tenants are more likely to be assigned a PIK, while cases with Hispanic tenants are less likely to be assigned a PIK. The second column of Table D.1 re-estimates the regression but replaces the eviction order right-hand side variable with judge stringency. The column (2) estimates show that moving from the 10th to the 90th percentile in stringency (a difference of 0.07) is associated with a decrease in the likelihood of being assigned a PIK by 0.38 percentage points ( $-0.054 \times 0.07$ ), which is a 0.73 percent decrease relative to the overall PIK rate of 61 percent. This estimate shows that being assigned a strict judge is associated with a small decrease in the likelihood of being linked to Census data sets. This correlation likely arises due to the Census linkage process, which may incorporate post-filing information that is impacted by eviction. We emphasize that this result does not threaten the internal validity of our analysis, conditional on having a PIK, we have balance in individual and case characteristics, as shown in Table III, and explore exogeneity further in G.B.

Table D.2 provides estimates from the analogous regression for the credit bureau sample. To construct the credit bureau analysis sample, Experian assigned a unique identifier to each individual in the court records based on names and addresses. Table D.2 shows the estimates of an indicator for being successfully assigned an Experian identifier on the same set of case characteristics excluding race variables, to comply with our data use agreement with Experian. The second column shows that the stringency of the assigned judge does not predict a case being linked.

### *D.B New York*

We link individuals in our New York court records from 2007-2016 to public assistance records covering Medicaid, Food Stamps, and cash assistance, which we then link to earnings, employment, residential mobility, homelessness, and hospital visit outcomes. We limit our sample to records that link to a benefits case prior to the housing court filing.

We first describe the procedure used to link housing court records to administrative benefits files. Our housing court records contain only first name, last name, and address.

The administrative benefits data include every address that an individual has provided for the years covered in our benefits data. These are 2001–2016 for Cash Assistance, 2004–2016 for Food Stamps, and 2006–2016 for Medicaid. For each address record, we have a client ID and case number. We use the client ID to add the first name, last name, date of birth, and Social Security Number. After cleaning the names in the courts data, including removing non-numeric characters and obvious aliases (“John/Jane Doe”), we have 1.7 million distinct name-address pairs. The benefits file is large, with nearly 70 million person-case-address-date combinations.

We “block” our matching algorithm on borough/county and phonic similarity (same Soundex transformation of first and last name) due to the size of the data sets and the computational capacity required by the record-linking procedures. This blocking establishes the most general requirements that must be met to be in the universe of possible matches. After narrowing to phonically similar records in the same borough/county, we drop any match for which the date of the benefits record is after the housing court filing date to ensure that the match is not endogenous to our treatment. We are left with matrices of all possible pairwise combinations of housing court records with a benefits record that meets these criteria (e.g. within borough pairs with similar names), with a median of 16 cases per court record.

We then apply a modified version of the common EM (expectation-maximization) algorithm described by Fellegi and Sunter (1969), which can also be thought of as a naïve Bayes classifier. We modify this conventional probabilistic matching algorithm by replacing binary string agreement with an indicator function applied to string distance measure (in this case, the Jaro-Winkler string distance  $J_{ij}$  for record pair  $i, j$ ). If the Jaro-Winkler distance exceeds 0.85 it is considered a “match” in the EM algorithm. This is a common threshold that yields matches that appear valid but is also robust to misspelling and incorporates name complexity. The algorithm calculates a separate “Name Score,” where  $M_a$  is the probability that the field matches given that the match is true:  $P(M_i = M_j | \text{Match} = \text{True})$ . Since we don’t know which matches are in fact “true”, we must assume a value for  $M_a$ . We set  $M_a = 0.95$ , which is a common choice for names in the literature.  $U_a$  is the probability that the field matches when the true match is false  $P(M_i = M_j | \text{Match} \neq \text{True})$ . This measure is akin to how common or rare a name is. We estimate these quantities in the benefits data directly, which contain over 9 million unique persons. We set a lower bound of 0.0000002.

$$\begin{aligned}
 \text{Name Score}_{ij} = & \log \left( \frac{M_{first}}{U_{first}} \right) \mathbf{1} (J_{ij} (\text{First Name}) \geq 0.85) & (D.1) \\
 & + \log \left( \frac{M_{last}}{U_{last}} \right) \mathbf{1} (J_{ij} (\text{Last Name}) \geq 0.85) + \dots \\
 & + \log \left( \frac{1 - M_{first}}{1 - U_{first}} \right) \mathbf{1} (J_{ij} (\text{First Name}) < 0.85) \\
 & + \log \left( \frac{1 - M_{last}}{1 - U_{last}} \right) \mathbf{1} (J_{ij} (\text{Last Name}) < 0.85)
 \end{aligned}$$



Because large buildings in New York City often have multiple entrances and multiple valid addresses, we geocode all of our data to the borough-block-lot (BBL), which is equivalent to a parcel. The linking geo-fields are BBL and census block. These receive different  $M$  and  $U$  probabilities to account for the likelihood of matching on BBL (unlikely) versus census block (slightly more likely). We list these probabilities directly in the formula below:

$$\begin{aligned} \text{Geo Score}_{ij} = & \log \left( \frac{0.975}{U_{BBL}} \right) \mathbf{1}(\text{BBL Courts}=\text{BBL Benefits}_{ij}) + \dots & (\text{D.2}) \\ & + \log \left( \frac{0.95}{0.05} \right) \mathbf{1}(\text{Block Court}=\text{Block Benefits}_{ij}) + \dots \\ & + \log \left( \frac{1 - 0.975}{1 - U_{BBL}} \right) (1 - \mathbf{1}(\text{BBL Courts}=\text{BBL Benefits}_{ij})) \\ & + \log \left( \frac{1 - 0.95}{1 - 0.05} \right) (1 - \mathbf{1}(\text{Block Court}=\text{Block Benefits}_{ij})) \end{aligned}$$

The algorithm then proceeds as follows:

1. Rank Name Score (ties are broken by relative closeness to filing date)
2. Rank Geo Score (ties are broken by relative closeness to filing date)
3. Assign a match to any exact matches and set aside (ties are broken by relative closeness to filing date)
4. For non-exact matches, keep pairs with same top name and top geo records, assign to best available record
5. For non-exact matches with disagreeing top name and top geo record, sum the Name Score and Geo Score and rank the combined score (ties are broken by relative closeness to filing date), assign to best available record
6. From best available records, discard the pair if the score is below the minimum matching threshold of 15.<sup>11</sup>

We next analyze the characteristics that are predictive of a match in New York. Table D.3 reproduces Table D.1 for the New York benefits sample. In column (1), we regress an indicator for linking to the benefits data on individual, case, and neighborhood characteristics, as well as receiving an eviction order. In column (2), we repeat the exercise but replace eviction order with the stringency instrument. Column (2) shows that stringency is uncorrelated with matching to the benefits data.

The New York housing court records were linked to Experian records using tenant name and address.<sup>12</sup> Table D.4 reproduces Table D.2 for the New York credit bureau sample. Cases

---

<sup>11</sup>This threshold was selected based on extensive clerical review of match quality.

<sup>12</sup>This linkage included additional housing court records from 2017, which were not available at the time of the benefits linkage.

with a tenant predicted to be female are more likely to be linked to an Experian record, while cases ending with an eviction order are slightly less likely to be linked. Judge stringency is uncorrelated with the likelihood of being linked to Experian data.

In Table D.5, we report additional results for the relationship between stringency and linkages to available data in New York. The first two columns repeat regressions of an indicator for linking to the benefits data on stringency, without controls (column 1) and with controls (column 2). The controls here are characteristics that can be observed in the court records: ad damnum amount, neighborhood characteristics, whether the tenant had legal representation and whether the tenant had a prior case. Stringency is uncorrelated with linkages to the benefits data and this relationship is unchanged with the inclusion of controls. We also investigate whether stringency is related to having a valid SSN within the linked sample. Having a valid SSN is necessary for being included in the linkage for labor market outcomes. Columns (3) and (4) use the linked-benefits sample and explore the relationship between missing a valid SSN, and the stringency instrument (with and without controls, respectively). Within the benefits data, stringency is uncorrelated with missing a valid SSN.

Table D.6 compares the linked benefits sample to the overall housing court population in New York City to better understand the nature of selection into the benefits sample. The characteristics of the housing court population come from a survey conducted in 2016 (NYC Office of Civil Justice 2016). The linked benefits sample is broadly similar to the larger housing court population in terms of age and gender. The linked sample is somewhat more likely to be female and household sizes for the linked sample appear smaller.

**Table D.1: Linked to Census records—Cook County**

|                           | Has PIK                  |                          |
|---------------------------|--------------------------|--------------------------|
|                           | (1)                      | (2)                      |
| Intercept                 | 0.5514***<br>(0.00903)   | 0.5632***<br>(0.01984)   |
| Evicted                   | -0.05073***<br>(0.00239) |                          |
| Judge stringency          |                          | -0.05394**<br>(0.02658)  |
| Joint action              | 0.02719***<br>(0.00315)  | 0.02618***<br>(0.00322)  |
| Female (predicted)        | 0.06049***<br>(0.00171)  | 0.06097***<br>(0.00171)  |
| White (predicted)         | 0.1284***<br>(0.00671)   | 0.1248***<br>(0.00676)   |
| Black (predicted)         | 0.1232***<br>(0.00623)   | 0.1173***<br>(0.00621)   |
| Hispanic (predicted)      | -0.03052***<br>(0.0066)  | -0.0366***<br>(0.00668)  |
| Tenant without attorney   | -0.05457***<br>(0.00433) | -0.06266***<br>(0.00432) |
| Ad damnum (1000s)         | -0.04006***<br>(0.00314) | -0.04249***<br>(0.00317) |
| Neighborhood poverty rate | -0.07974***<br>(0.00924) | -0.0808***<br>(0.00929)  |
| Neighborhood median rent  | -0.03832***<br>(0.0062)  | -0.03267***<br>(0.00626) |
| Number of Observations    | 457,000                  | 457,000                  |

*Notes:* \*  $p < 0.1$ , \*\*  $p < 0.05$ , \*\*\*  $p < 0.01$ . This table shows results in column (1) from the regression of an indicator for if the individual was linked to Census records in Cook County regressed on covariates and eviction order, and column (2) shows the results from a regression on covariates and the stringency instrument. Race is imputed using a Bayesian procedure using last names and racial composition of census tracts as proposed in Imai and Khanna (2016). Gender is predicted using first names as described in Blevins and Mullen (2015). The regressions also include controls for court and year, and indicators for missing covariates (not reported). Standard errors are in parentheses. Cook County observation counts are rounded in accordance with Census Bureau disclosure requirements. Cook County results were approved for release by the U.S. Census Bureau, authorization number CBDRB-FY22-072.

**Table D.2: Linked to Experian Records—Cook County**

|                           | (1)                 | (2)                 |
|---------------------------|---------------------|---------------------|
| Evicted                   | -0.019**<br>(0.002) |                     |
| Judge stringency          |                     | -0.011<br>(0.031)   |
| Female (predicted)        | 0.187**<br>(0.003)  | 0.187**<br>(0.003)  |
| Joint action              | 0.069**<br>(0.003)  | 0.068**<br>(0.003)  |
| Tenant without attorney   | -0.008*<br>(0.005)  | -0.010*<br>(0.004)  |
| Ad damnum (1000s)         | -0.004**<br>(0.000) | -0.004**<br>(0.000) |
| Neighborhood poverty rate | -0.020*<br>(0.008)  | -0.022**<br>(0.008) |
| Neighborhood median rent  | 0.006<br>(0.006)    | 0.007<br>(0.006)    |
| Number of observations    | 444,565             | 444,565             |

*Notes:* \*  $p < 0.1$ , \*\*  $p < 0.05$ , \*\*\*  $p < 0.01$ . This table shows results in column (1) from the regression of an indicator for if the individual was linked to Experian records in Cook County regressed on covariates and eviction order, and column (2) shows the results from a regression on covariates and the stringency instrument. The regressions also include controls for court and year, and indicators for missing covariates (not reported). Standard errors are in parentheses and are clustered at the judge-year level.

**Table D.3: Linked to Benefits—New York**

|                           | Matched to Benefits |                     |
|---------------------------|---------------------|---------------------|
|                           | (1)                 | (2)                 |
| Evicted                   | 0.057***<br>(0.002) |                     |
| Judge stringency          |                     | -0.011<br>(0.017)   |
| Female (predicted)        | 0.043***<br>(0.002) | 0.017***<br>(0.002) |
| Black (predicted)         | 0.148***<br>(0.007) | 0.163***<br>(0.007) |
| Hispanic (predicted)      | 0.095***<br>(0.004) | 0.114***<br>(0.004) |
| Ad damnum (1000s)         | -0.000<br>(0.000)   | 0.000<br>(0.000)    |
| Tenant without attorney   | 0.043***<br>(0.007) | 0.022***<br>(0.007) |
| Neighborhood poverty rate | 0.200***<br>(0.008) | 0.149***<br>(0.008) |
| Neighborhood median rent  | -0.001<br>(0.005)   | 0.076***<br>(0.004) |
| Observations              | 577,823             | 577,823             |

*Notes:* \*  $p < 0.1$ , \*\*  $p < 0.05$ , \*\*\*  $p < 0.01$ . This table shows results in column (1) from the regression of an indicator for if the individual was linked to administrative benefits records in New York regressed on covariates and eviction order, and column (2) shows the results from a regression on covariates and the stringency instrument. Race is imputed using a Bayesian procedure using last names and racial composition of census tracts as proposed in Imai and Khanna (2016). Gender is predicted using first names as described in Blevins and Mullen (2015). The regressions also include controls for court and year of filing, and indicators for missing covariates (not reported). Standard errors are in parentheses, and are clustered at the courtroom/judge-year level.

**Table D.4: Linked to Experian Records—New York**

|                           | Matched to Experian  |                      |
|---------------------------|----------------------|----------------------|
|                           | (1)                  | (2)                  |
| Evicted                   | -0.025***<br>(0.002) |                      |
| Judge stringency          |                      | -0.006<br>(0.029)    |
| Female (predicted)        | 0.198***<br>(0.003)  | 0.199***<br>(0.003)  |
| Ad damnum (1000s)         | 0.000<br>(0.000)     | 0.000<br>(0.000)     |
| Tenant without attorney   | 0.032***<br>(0.009)  | 0.029**<br>(0.009)   |
| Neighborhood poverty rate | -0.077***<br>(0.014) | -0.078***<br>(0.014) |
| Neighborhood median rent  | -0.055***<br>(0.006) | -0.056***<br>(0.006) |
| Observations              | 278,875              | 278,875              |

*Notes:* \*  $p < 0.1$ , \*\*  $p < 0.05$ , \*\*\*  $p < 0.01$ . This table shows results in column (1) from the regression of an indicator for if the individual was linked to Experian records in New York regressed on covariates and eviction order, and column (2) shows the results from a regression on covariates and the stringency instrument. The regressions also include controls for court and year of filing, and indicators for missing covariates (not reported). Standard errors are in parentheses, and are clustered at the courtroom/judge-year level.

**Table D.5: Matching—New York**

|                  | Matched to Benefits |                     | Missing SSN        |                    |
|------------------|---------------------|---------------------|--------------------|--------------------|
|                  | (1)                 | (2)                 | (3)                | (4)                |
| Judge stringency | -0.0131<br>(0.0180) | -0.0112<br>(0.0175) | 0.0072<br>(0.0143) | 0.0083<br>(0.0139) |
| Controls         | No                  | Yes                 | No                 | Yes                |
| Observations     | 577,851             | 577,823             | 181,887            | 181,840            |

*Notes:* \*  $p < 0.1$ , \*\*  $p < 0.05$ , \*\*\*  $p < 0.01$ . This table reports the relationship between our instrument and indicators of data matching success in the New York City sample. In Columns (1) and (2), we use all the court records and regress an indicator for matching to the benefits data (and thus being included in our estimation sample) on our instrument, with and without controls. In Columns (3) and (4), we regress an indicator for missing a valid social security number on our instrument. All specifications include court-by-time of filing fixed effects. Standard errors are in parentheses and are clustered at the courtroom-year level.

**Table D.6: Linked Sample Compared to Housing Court Population—New York**

| Variable          | Sample Comparison                 |                                    |
|-------------------|-----------------------------------|------------------------------------|
|                   | Matched Sample (2007-2016)<br>(1) | Housing Court Survey (2016)<br>(2) |
| Female            | 0.70                              | 0.66                               |
| Male              | 0.30                              | 0.34                               |
| Age (Mean)        | 44.3                              | 44.1                               |
| Age Distribution: |                                   |                                    |
| 19-24             | 0.05                              | 0.03                               |
| 25-34             | 0.24                              | 0.22                               |
| 35-44             | 0.25                              | 0.29                               |
| 45-54             | 0.25                              | 0.25                               |
| 55-64             | 0.14                              | 0.14                               |
| 65+               | 0.07                              | 0.06                               |
| Has Children      | 0.47                              | 0.51                               |
| Household Size:   |                                   |                                    |
| 1                 | 0.39                              | 0.26                               |
| 2                 | 0.22                              | 0.24                               |
| 3                 | 0.18                              | 0.25                               |
| 4                 | 0.11                              | 0.15                               |
| 5+                | 0.10                              | 0.11                               |

*Notes:* This table reports characteristics for linked benefits-housing court sample in column (1) (without the 18–55 age restriction) and the characteristics of a sample of tenants in housing court in 2016 (based on survey results reported in NYC Office of Civil Justice 2016, p. 41) in column (2).

# E APPENDIX: OUTCOME TRENDS AROUND COURT FILING: BY CITY AND ADDITIONAL RESULTS

This section provides additional descriptive trends similar to those in Section IV in the main draft. Figure E.1 shows trends for if the individual was reported at any address in the MAFARF data used in Cook County. Prior to eviction, evicted tenants are somewhat less likely to be observed than their non-evicted counterparts. This gap grows after the eviction case is filed. Figures E.2 and E.3 reproduce Tables II and III from the paper separately by city.

Figure E.1: Observed at Address this Year (Cook County)

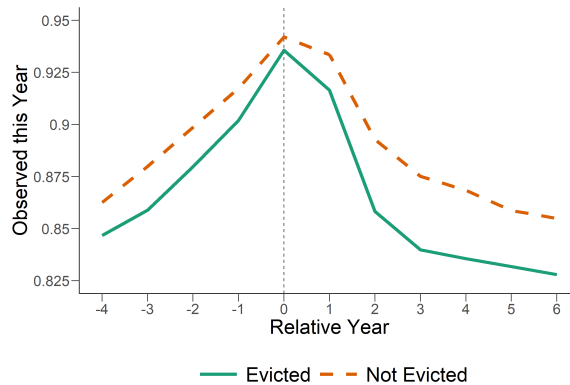

*Notes:* This figure plots trends on if a person was observed in the MAFARF data relative to eviction filing for each location, estimated using equation IV.1. The outcome is an indicator equal to 1 if an individual is recorded at an address in the MAFARF that year, and 0 otherwise, measured at an annual frequency. We plot results for the evicted and non-evicted groups in each time period. The only controls are calendar year dummies. For both sets of coefficients, we add in the non-evicted group mean in the omitted period so that the magnitudes are easy to interpret. Cook County results were approved for release by the U.S. Census Bureau, authorization number CBDRB-FY22-072.



Figure E.2: Labor Market and Housing Outcomes Relative to Time of Eviction Filing

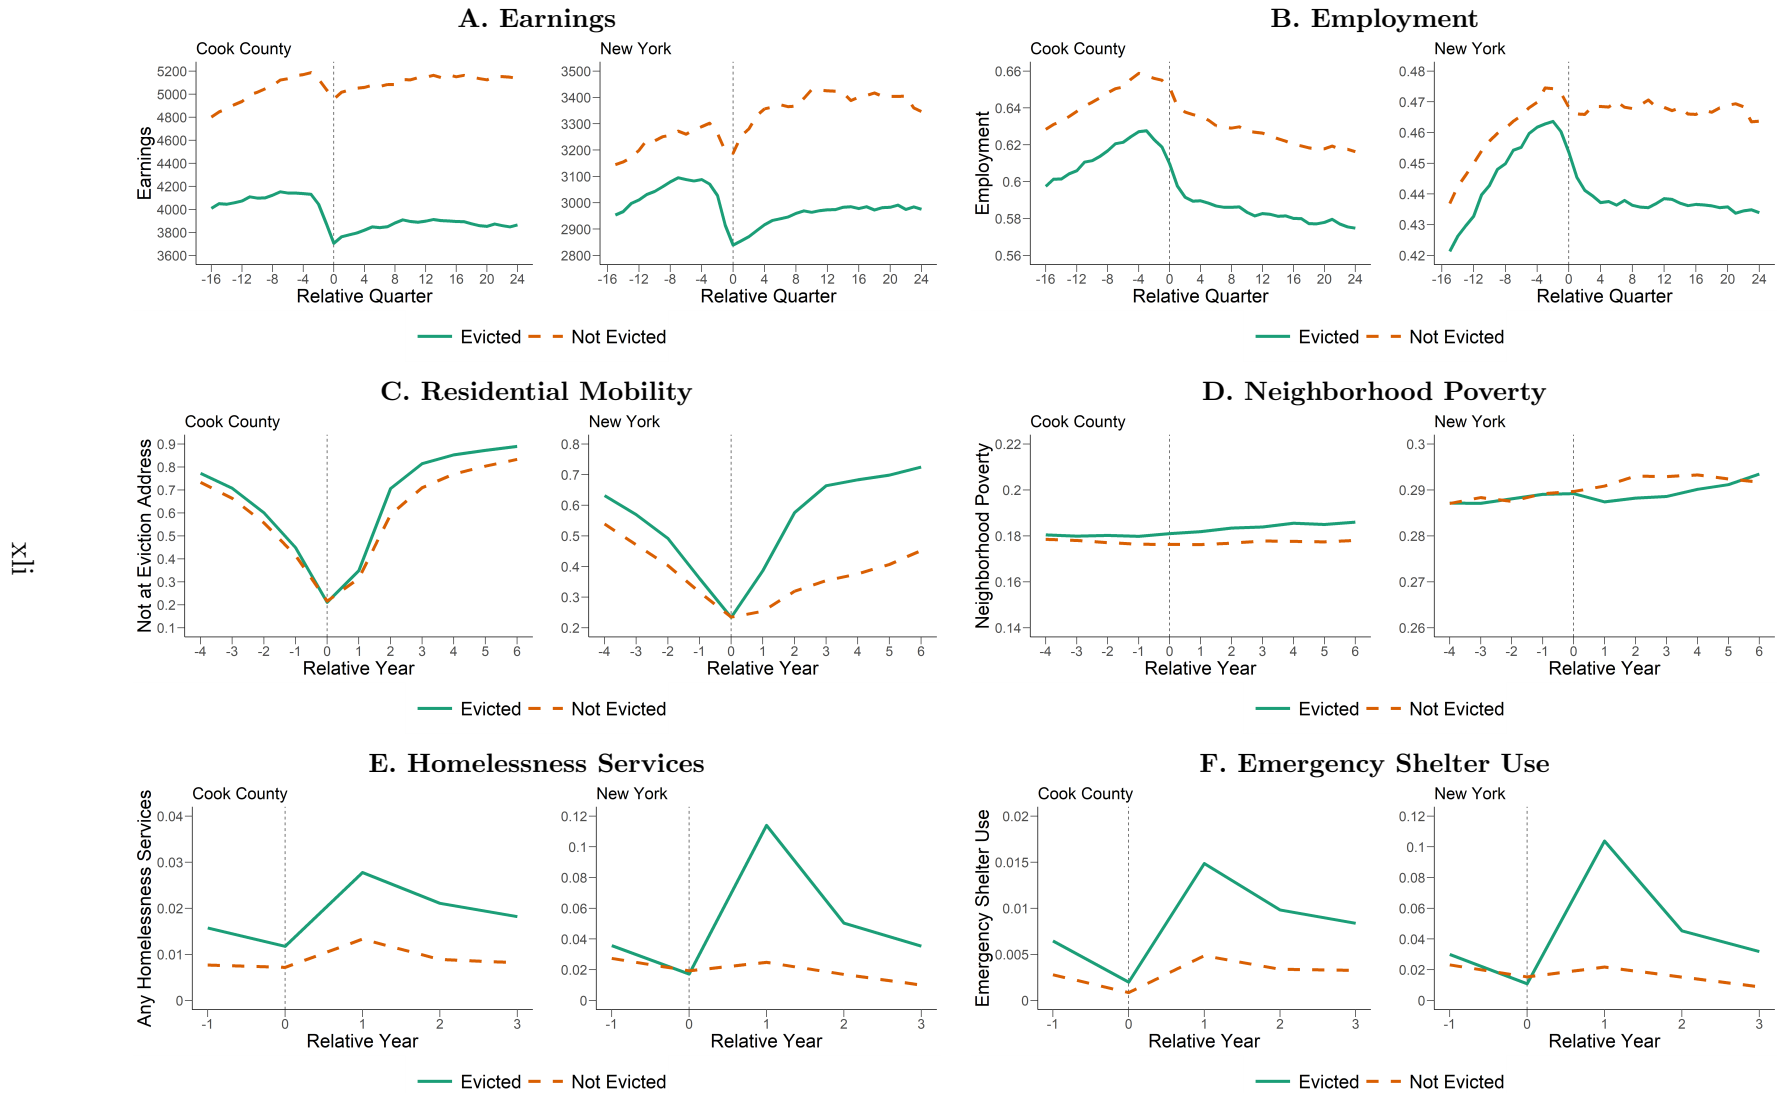

Notes: This figure plots trends in labor market and housing outcomes relative to eviction filing for each location, estimated using equation IV.1. The only controls are calendar year dummies. For both sets of coefficients, we add in the non-evicted group mean in the omitted period so that the magnitudes are easy to interpret. The employment and earnings outcomes are measured at a quarterly frequency, while the housing outcomes are measured at an annual frequency. Cook County results were approved for release by the U.S. Census Bureau, authorization number CBDRB-FY22-072.

Figure E.3: Financial Health Outcomes Relative to Time of Eviction Filing

A. Financial Health Index

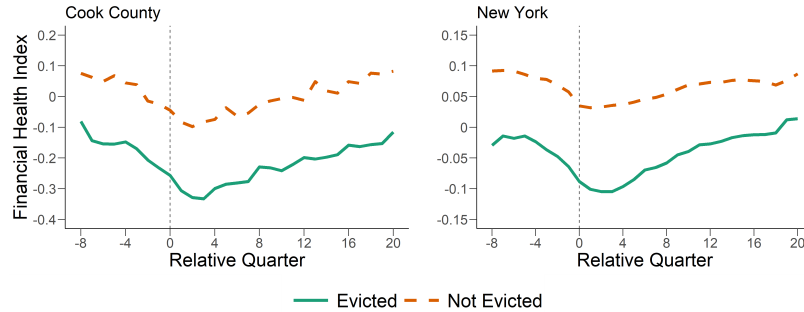

B. Credit Score

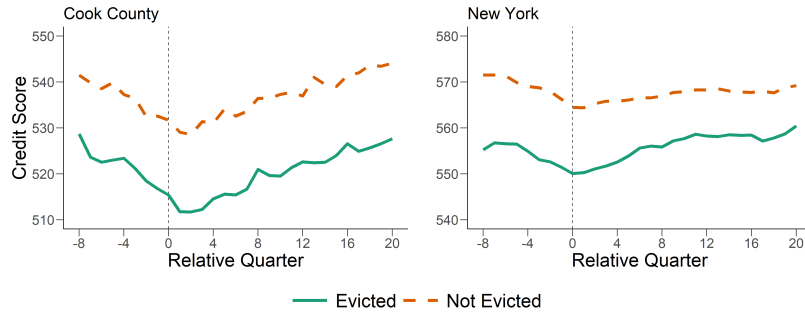

C. No Open Revolving Account

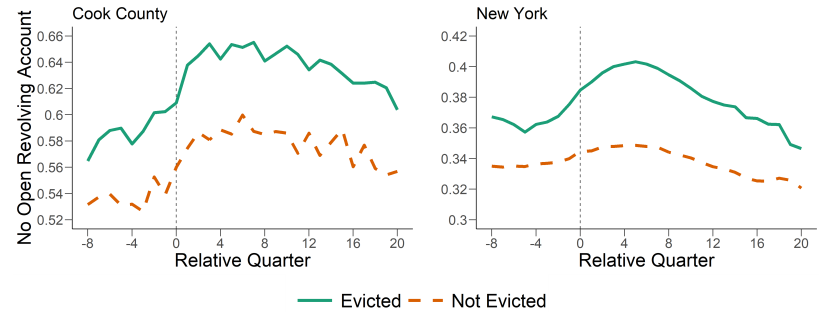

D. Total Balance: Collections and Delinquencies

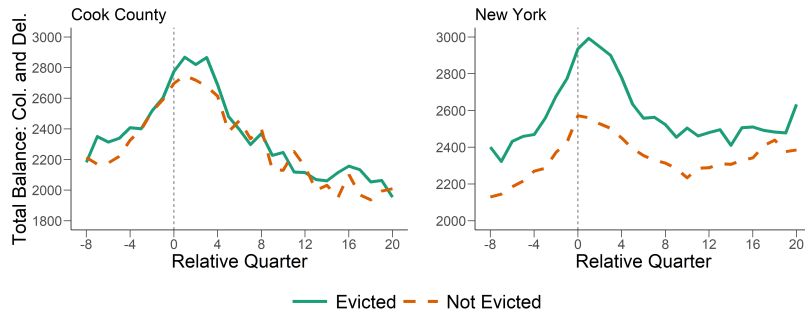

E. Any Auto Loan or Lease

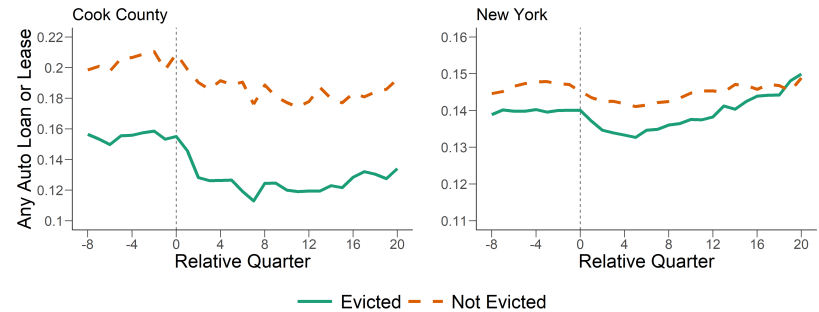

Notes: This figure plots trends in credit bureau outcomes relative to eviction filing for each location, estimated using equation IV.1. The only controls are calendar year dummies. For both sets of coefficients, we add in the non-evicted group mean in the omitted period so that the magnitudes are easy to interpret. All outcomes are measured at a quarterly frequency.

## F APPENDIX: ADDITIONAL EVIDENCE OF SELECTION INTO EVICTION COURT

One challenge faced by prior research on eviction is finding an appropriate comparison group for evicted tenants. Studies based on survey data typically compare tenants who report being evicted to observationally similar tenants from the neighborhood.<sup>13</sup> We show in Section IV that there is substantial selection into eviction court: tenants who are at risk of eviction are, on average, significantly more disadvantaged than tenants from the same neighborhood. The implication is that, without an appropriate comparison group, studies may find effects of eviction that are largely due to the composition of tenants who arrive at court. We also show selection *within* eviction court, into the eviction case outcome: tenants who are evicted are more disadvantaged than tenants who are not evicted.

Figure F.1 illustrates the extent of selection into eviction court and selection into the eviction case outcome within court with earnings as the outcome (Figure F.2 repeats the exercise for employment). We begin with our linked court sample and append a random sample of comparison tenants.<sup>14</sup> Focusing first on selection into court, the leftmost bars show the level differences between evicted tenants' post-eviction earnings, averaged one to eight quarters after the case filing, and earnings among renters who live in the same neighborhoods, adjusting for age and demographics. Evicted tenants earn over \$1,600 less per quarter in Cook County and approximately \$1000 less per quarter in New York. The magnitude of the gap differs somewhat between the two cities, which likely reflects that the New York sample consists of benefits recipients only. Despite the different populations, the patterns in Figure F.1 are remarkably similar across cities.

If we were to interpret the leftmost bar in the top panel of Figure F.1 as estimates of the causal impact of eviction, the results would suggest large effects of eviction on future earnings. Once we change the comparison group to non-evicted tenants in court, however, shown in the second bar, this difference shrinks by roughly one third, implying a large degree of selection into court. Selection into court may be a concern when interpreting much of the prior research on the consequences of eviction, which does not have a comparison group of non-evicted tenants in eviction court. To avoid bias due to selection into court, we restrict our sample to tenants in eviction court.

As we document in Section IV, there is also selection into who receives an eviction order

---

<sup>13</sup>See, for example, Burgard, Seefeldt, and Zelter (2012), Desmond and Shollenberger (2015), Desmond and Kimbro (2015), Desmond, Gershenson, and Kiviat (2015), Desmond and Gershenson (2017).

<sup>14</sup>In Cook County, this is a sample of renters in the ACS linked to quarterly earnings and employment records. In New York, it is a representative sample of adults receiving public assistance linked to quarterly earnings and employment records. In New York we do not observe whether individuals are renters or homeowners, but they are likely majority renters since they are receiving public assistance. We assign these comparison individuals a placebo filing month, randomly drawn from the sample period, and re-weight the regression sample so that the random sample matches the court sample in its distribution across census tracts in Cook County and ZIP codes in New York.

*within* housing court. Evicted tenants have lower levels of earning and employment than not-evicted tenants in court the period before filing. We can adjust for differences in levels with a DiD estimator. The right-most bar adds estimates from a symmetric DiD, which is described in detail in [J](#) and is estimated using equation [J.7](#). The difference between evicted tenants and not-evicted tenants in court shrinks further when we adjust for pre-existing differences in levels to -\$194 in New York and -\$157 in Cook County. Hence, prior to eviction court, tenants who are evicted are more economically distressed than non-evicted tenants, and controlling for prior distress can meaningfully affect conclusions about the consequences of eviction.

The extent of selection into eviction court reveals the importance of having an appropriate comparison group for evicted tenants; comparing evicted tenants to tenants from the same neighborhood is likely to overstate the impact of an eviction. The extent of selection within court into the eviction case outcome makes clear that empirically estimating the casual effect of an eviction requires a plausible source of random assignment into treatment. To deal with the first source of selection, we use our linked eviction court records, which allow us to compare evicted tenants to non-evicted tenants in eviction court. To deal with the second source of selection, we employ an IV strategy, which we describe in detail in [Section V](#).

**Figure F.1: Selection into Housing Court and Eviction - Earnings**

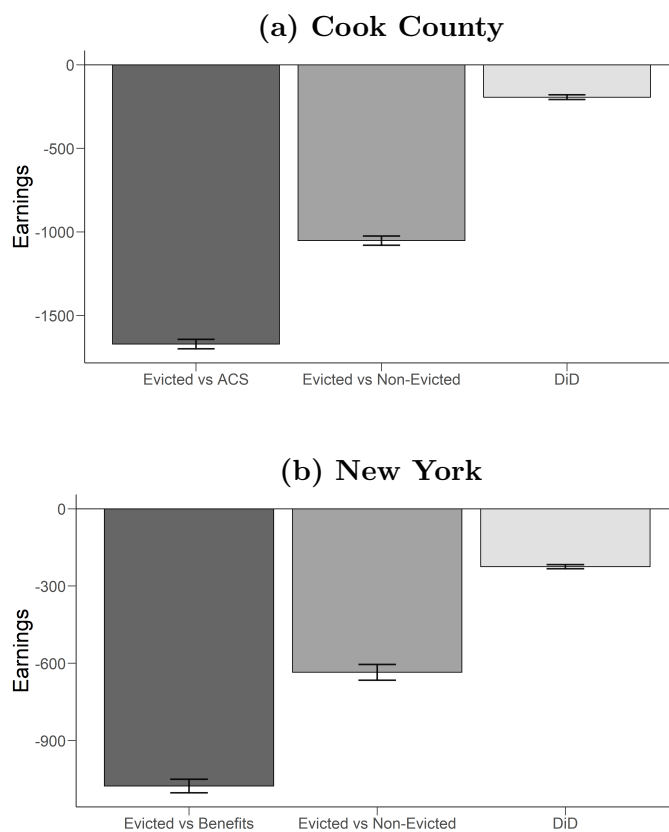

*Notes:* This figure shows evidence of earnings-based selection into housing court and eviction for Cook County and New York for quarters 1-8 after eviction case filing. Each bar represents the coefficient from a regression of earnings on a dummy for being evicted in housing court where the reference group is the second group listed under the bar. Earnings is defined as average quarterly earnings in the two years following the court proceedings. For each regression, the sample is restricted to evicted individuals and the reference group. Specifically: “Evicted vs ACS” (or “Evicted vs Benefits” for New York) compares evicted individuals to an ACS (Benefits) weighted sample; “Evicted vs Non-Evicted” compares evicted individuals to non-evicted individuals in housing court; and “DiD” shows the results from our DiD specification. The regressions used to produce the estimates in the left-most bar and center bar include age, race, and gender controls. The DiD specification includes individual fixed effects and time relative to filing dummies and is described in equation J.7. Cook County results were approved for release by the U.S. Census Bureau, authorization number CBDRB-FY22-072.

**Figure F.2: Selection into Housing Court and Eviction—Employment**

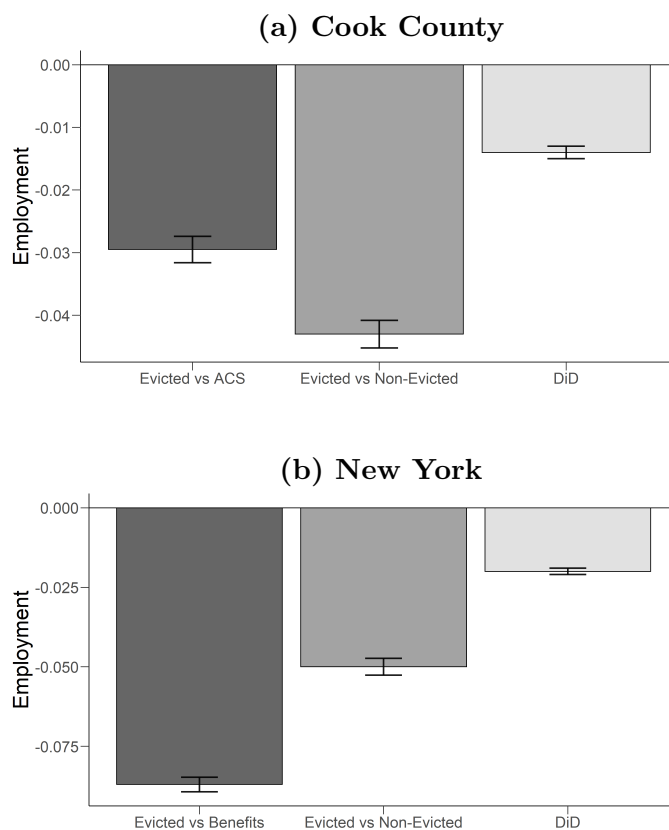

*Notes:* This figure shows evidence of employment-based selection into housing court and eviction for Cook County and New York. Each bar represents the coefficient from a regression of employment on a dummy for being evicted in housing court where the reference group is the second group listed under the bar. Employment is defined as being observed as employed in the two years following the court proceedings. For each regression, the sample is restricted to evicted individuals and the reference group. See Appendix Figure F.1 for details about specifications and definitions. Cook County results were approved for release by the U.S. Census Bureau, authorization number CBDRB-FY22-072.

**Table F.1: Summary Statistics: Financial Health Outcomes**

|                                              | Cook County       |                    |                      | New York          |                    |
|----------------------------------------------|-------------------|--------------------|----------------------|-------------------|--------------------|
|                                              | Evicted<br>(1)    | Not Evicted<br>(2) | Random Sample<br>(3) | Evicted<br>(4)    | Not Evicted<br>(5) |
| <i>Person Characteristics</i>                |                   |                    |                      |                   |                    |
| Age at filing                                | 36.536<br>(9.300) | 36.647<br>(9.178)  | 37.049<br>(10.236)   |                   |                    |
| Female                                       | 0.653<br>(0.476)  | 0.649<br>(0.477)   | 0.489<br>(0.500)     |                   |                    |
| <i>Outcomes: Quarters 1-8 Before Filing</i>  |                   |                    |                      |                   |                    |
| Financial health index                       | -0.174<br>(0.887) | 0.022<br>(0.981)   | 0.683<br>(1.166)     | -0.112<br>(1.006) | 0.002<br>(1.005)   |
| Credit score                                 | 521<br>(65)       | 536<br>(75)        | 605<br>(108)         | 548<br>(115)      | 564<br>(112)       |
| No open revolving account                    | 0.591<br>(0.487)  | 0.542<br>(0.494)   | 0.368<br>(0.479)     | 0.395<br>(0.449)  | 0.358<br>(0.439)   |
| Total balance: collections and delinquencies | 2,340<br>(4,953)  | 2,301<br>(5,014)   | 1,458.082<br>(4,420) | 2,448<br>(6,136)  | 2,234<br>(5,842)   |
| Any auto loan or lease                       | 0.150<br>(0.352)  | 0.199<br>(0.395)   | 0.199<br>(0.396)     | 0.118<br>(0.300)  | 0.122<br>(0.305)   |
| Observations                                 | 105,666           | 57,254             | 250,881              | 48,319            | 108,543            |

*Notes:* This table presents means and standard deviations (in parentheses) of key variables in our linked credit bureau sample used in the IV analysis for Cook County, compared to a random sample, and for New York. (We do not have a random sample for New York.) For the random sample, we randomly assign a placebo eviction date to compare baseline financial outcomes relative to the eviction sample. To permit comparability, the financial health variable in the random sample is standardized based on the eviction court sample's non-evicted mean and standard deviation in the filing year. Both samples are restricted to individuals age 18–55 at the time of filing. The random sample has been reweighted to match the distribution of individuals across zip codes in the eviction sample.

## G APPENDIX: ROBUSTNESS OF THE IV RESEARCH DESIGN

This section provides additional robustness of the IV empirical design, providing evidence behind the relevance, exogeneity, exclusion, and monotonicity assumptions.

### *G.A First Stage*

Table G.1 shows that the strong first stage is robust to several different instrument constructions for each location. We show that the first stage is insensitive to controlling for other dimensions of judge behavior. Moreover, the first stage remains strong using an alternate approach to measuring the first judge/courtroom in the court records, excluding cases in which the tenant was never served, or constructing the instrument without imposing any restrictions on how many cases the judge sees per year.

Table G.2 reports the partial F-statistic from the first stage regressions of the eviction indicator on judge stringency with the full set of controls described in Table II. Column (1) shows F-statistics for Cook County and Column (2) shows F statistics for New York. The first row reports the F-statistic for the full analysis sample. The second row reports the F-statistic when restricting the analysis to the female sample, and the final row reports the F-statistic for when restricting to the Black sample.

Table G.3 reports the coefficient on judge stringency from the first stage in the linked Experian samples for Cook County and New York.



**Table G.1: First Stage Robustness**

| Sample                                            | Coefficient | Standard Error | P-Value | Observations |
|---------------------------------------------------|-------------|----------------|---------|--------------|
| <i>Cook County</i>                                |             |                |         |              |
| Main                                              | 0.822       | 0.026          | 0.000   | 453,618      |
| Controlling for other judge stringency dimensions | 0.834       | 0.026          | 0.000   | 447,184      |
| Alternate first judge construction                | 0.826       | 0.025          | 0.000   | 439,943      |
| All cases                                         | 0.632       | 0.027          | 0.000   | 577,675      |
| Excluding cases never served                      | 0.827       | 0.024          | 0.000   | 408,967      |
| <i>New York</i>                                   |             |                |         |              |
| Main                                              | 0.850       | 0.018          | 0.000   | 577,850      |
| Alternate courtroom construction                  | 0.785       | 0.019          | 0.000   | 577,820      |
| Controlling for other stringencies                | 0.866       | 0.021          | 0.000   | 577,850      |
| All cases                                         | 0.954       | 0.008          | 0.000   | 899,599      |

*Notes:* The top panel shows the first-stage regression on the full Cook County Sample. The “Main” row shows the main specification, the “Controlling for other judge chars.” row additionally controls for leave-one-out judge stringency in judgment amounts, granting stays, and granting continuances. “Alternative first judge construction” assigns the first judge associated with the case after the tenant was served, rather than the judge implied by the random assignment of court room and time. “All cases” does not impose restrictions on how many cases the judge sees per year. “Excluding cases never served” excludes cases where the tenant was never served. The bottom panel reports the first stage using the main specification (“Main”), using the last courtroom with a hearing rather than first courtroom assigned (“Alternate courtroom construction”), controlling for stay stringency and emergency assistance stringencies (“Controlling for other stringencies”), and using all cases including public housing cases and others not randomly assigned (“All cases”). Across both panels we use the full set of cases from each location rather than those linked to outcomes.

**Table G.2: F-Statistics from First Stage Regressions**

|                             | Cook County<br>(1) | New York<br>(2) |
|-----------------------------|--------------------|-----------------|
| F-Statistic - Full Sample   | 934                | 288             |
| F-Statistic - Female Sample | 563                | 233             |
| F-Statistic - Black Sample  | 482                | 179             |

*Notes:* This table reports the partial F-statistics on the instrument from the first stage regression run on the full sample (shown in first row), on the female subsample (in second row) and on the Black subsample (in third row). Column (1) shows the F-statistics for Cook County, and column (2) shows the F-statistics for New York. Cook County results were approved for release by the U.S. Census Bureau, authorization number CBDRB-FY22-072.

**Table G.3: Experian First Stage**

|                  | Cook County         |                     | New York            |                     |
|------------------|---------------------|---------------------|---------------------|---------------------|
|                  | (1)                 | (2)                 | (3)                 | (4)                 |
| Judge stringency | 0.723***<br>(0.043) | 0.721***<br>(0.043) | 0.898***<br>(0.025) | 0.891***<br>(0.026) |
| Controls         | No                  | Yes                 | No                  | Yes                 |
| Observations     | 168,555             | 168,555             | 156,862             | 156,862             |

*Notes:* \*  $p < 0.1$ , \*\*  $p < 0.05$ , \*\*\*  $p < 0.01$ . This table reports results for the first stage regression of eviction on judge stringency for the Cook County and New York credit bureau samples. Columns (1) and (3) show the regression including only judge stringency. Columns (2) and (4) add controls listed in Table VII. All columns include court-year fixed effects. Standard errors are included in parentheses and are clustered at the judge(courtroom)-year level.

## *G.B Exogeneity*

As discussed in Section 2, the validity of our instrument depends on an assumption of exogeneity. Since both court systems randomly assign cases to judges/courtrooms (see Section II) this assumption seems plausible in our settings. In Table III we show that our judge stringency measure is uncorrelated with a variety of baseline characteristics of tenants in the samples.

Due to differences in data availability, our analytical samples tend to differ slightly by outcome. Therefore, we provide additional evidence that stringency is exogenous within each of the relevant outcome samples. The top panel of Table G.4 reports the coefficients on judge stringency from separate regressions of lagged values of each of our key outcomes on judge stringency. The bottom panel repeats this for baseline demographic and case characteristics. Across both locations, judge stringency appears uncorrelated with baseline outcomes, demographics, and case characteristics.

Similarly, in Table G.5 we estimate a series of “placebo” IV regressions. Each row reports the results of a separate regression where the dependent variable is a lagged value of an outcome, we instrument for eviction order with judge stringency, and we include controls from before the lagged outcome to mirror our IV specification used in Tables IV-VI. In the third column of Table G.5, we produce a combined estimate from the two locations. In each case, we find that eviction is uncorrelated with the lagged outcomes when we instrument for it with judge stringency. Taken together, these results suggest that exogeneity is unlikely to be violated in our settings.

**Table G.4: Testing the Relationship Between Stringency and Lagged Outcomes, and Between Stringency and Demographic Characteristics**

|                                                     | Cook                 |                                    | New York             |                                  |
|-----------------------------------------------------|----------------------|------------------------------------|----------------------|----------------------------------|
|                                                     | $E[Y E=0]$<br>(1)    | RF<br>(2)                          | $E[Y E=0]$<br>(3)    | RF<br>(4)                        |
| <b>Lagged Outcomes</b>                              |                      |                                    |                      |                                  |
| Earnings (1-8 quarters before filing)               | 4,978.0<br>(5,549.0) | -125.2<br>(319.5)<br>[255,000]     | 3,557.3<br>(4,427.3) | -109.9<br>(412.1)<br>[144,429]   |
| Earnings (9-12 quarters before filing)              | 4,771.0<br>(5,652.0) | -61.5<br>(361.1)<br>[249,000]      | 3,477.7<br>(4,381.4) | -226.9<br>(415.6)<br>[144,429]   |
| Emergency Shelter (1 year before filing)            | 0.0023<br>(0.0475)   | -0.0047<br>(0.0071)<br>[19,000]    | 0.0050<br>(0.0706)   | 0.0054<br>(0.0068)<br>[181,887]  |
| Any homelessness services (1 year before filing)    | 0.0104<br>(0.1010)   | 0.0029<br>(0.0201)<br>[19,000]     | 0.0073<br>(0.0852)   | -0.0046<br>(0.0095)<br>[181,887] |
| Not at eviction address (1-2 years before filing)   | 0.6618<br>(0.4731)   | -0.0224<br>(0.0327)<br>[204,000]   | 0.2571<br>(0.4370)   | -0.0086<br>(0.0514)<br>[125,296] |
| Neighborhood poverty rate (1-2 years before filing) | 0.1976<br>(0.1247)   | -0.0205*<br>(0.0116)<br>[114,000]  | 0.2944<br>(0.1192)   | -0.0028<br>(0.0111)<br>[124,362] |
| <b>Demographic Characteristics</b>                  |                      |                                    |                      |                                  |
| Female                                              | 0.6223<br>(0.4849)   | 0.0134<br>(0.0300)<br>[255,000]    | 0.7260<br>(0.4460)   | -0.0371<br>(0.0280)<br>[181,887] |
| Black                                               | 0.6649<br>(0.4723)   | -0.0099<br>(0.0365)<br>[255,000]   | 0.5865<br>(0.4925)   | 0.0408<br>(0.0431)<br>[181,887]  |
| Hispanic                                            | -0.0078<br>(0.4475)  | 0.0518<br>(0.0321)<br>[255,000]    | 0.4551<br>(0.4980)   | 0.0118<br>(0.0402)<br>[181,887]  |
| Ad damnum (1000s)                                   | 1.6860<br>(3.0380)   | -0.1356<br>(0.2448)<br>[255,000]   | 3.6692<br>(2.8324)   | -0.2029<br>(0.2551)<br>[181,887] |
| Joint action                                        | 0.7981<br>(0.4014)   | -0.1018**<br>(0.0454)<br>[255,000] |                      |                                  |
| No prior                                            | 0.1741<br>(0.8619)   | -0.0290<br>(0.0249)<br>[255,000]   | 0.5276<br>(0.4992)   | -0.0115<br>(0.0338)<br>[181,887] |

*Notes:* \*  $p < 0.1$ , \*\*  $p < 0.05$ , \*\*\*  $p < 0.01$ . This table shows results from the regressions of lagged values of key outcomes on judge stringency in the top panel, and from regressions of demographic characteristics on judge stringency in the bottom panel. Columns (1) and (2) report the non-evicted sample means ( $\mathbb{E}[Y|E=0]$ ) and reduced form (RF) results for Cook County, and columns (3) and (4) report these estimates for New York. Outcomes are listed on the left of each row. Standard errors are in parentheses, and are clustered at the judge(courtroom)-year level. Observation counts are shown in brackets, below standard errors. Cook County observation counts are rounded in accordance with Census Bureau disclosure requirements. Cook County results were approved for release by the U.S. Census Bureau, authorization number CBDRB-FY22-072.

**Table G.5: Placebo Tests: Estimating the Impact of Eviction on Pre-Filing Outcomes**

|                                                  | Cook County<br>(1)             | New York<br>(2)                | Combined<br>(3)                |
|--------------------------------------------------|--------------------------------|--------------------------------|--------------------------------|
| <b>Housing:</b>                                  |                                |                                |                                |
| Not at eviction address                          | 0.007<br>(0.055)<br>[110,000]  | -0.027<br>(0.049)<br>[97,004]  | -0.010<br>(0.037)<br>[207,004] |
| Emergency shelter (1 year before filing)         | -0.004<br>(0.010)<br>[19,000]  | 0.006<br>(0.008)<br>[181,840]  | 0.001<br>(0.006)<br>[200,840]  |
| Any homelessness services (1 year before filing) | 0.020<br>(0.031)<br>[19,000]   | -0.006<br>(0.011)<br>[181,840] | 0.007<br>(0.017)<br>[200,840]  |
| <b>Labor Market:</b>                             |                                |                                |                                |
| Earnings                                         | -35<br>(221)<br>[255,000]      | 59<br>(242)<br>[150,662]       | 12<br>(164)<br>[405,662]       |
| Employment                                       | -0.031<br>(0.024)<br>[255,000] | 0.032<br>(0.029)<br>[150,662]  | 0.000<br>(0.018)<br>[405,662]  |

*Notes:* \*  $p < 0.1$ , \*\*  $p < 0.05$ , \*\*\*  $p < 0.01$ . This table shows IV regressions for outcomes 1-8 quarters prior to eviction case filing, with the exception of emergency shelter and any homelessness services, which are 1-4 quarters prior to evictions case filing. These outcomes serve as placebos, since the instrument should not affect outcomes prior to the filing of the case. Standard errors are in parentheses, and are clustered at the judge(courtroom)-year level. Controls for all model specifications are the same as those described in Table IV. The earnings (1-8 quarters before filing) regression also controls for earnings 3 and 4 years before filing; the earnings (9-12 quarters before filing) regression also controls for earnings 5 and 6 years before filing; emergency shelter and any homelessness services regressions also control for emergency shelter and any homelessness services 2 and 3 years before filing; the not at eviction address and neighborhood poverty rate regressions also control for not at eviction address and neighborhood poverty rate 3 and 4 years before filing. Observation counts are shown in brackets, below standard errors. Cook County observation counts are rounded in accordance with Census Bureau disclosure requirements. Cook County results were approved for release by the U.S. Census Bureau, authorization number CBDRB-FY22-072.

## *G.C Exclusion*

We next evaluate whether there is evidence against the exclusion restriction. Wherever possible, we provide evidence from both Cook County and New York. However, since not all aspects of judge behavior are recorded in both settings, we occasionally rely on data from one location only. In Tables G.6 and G.8, we report correlations between our instrument (judge stringency in the eviction order) and other dimensions of stringency in judge behavior. Across both locations, all stringency measures are calculated as judge-year leave-one-out averages. For Cook County, we construct judge stringency in granting continuances, stringency in judgment amount, and stringency in granting stays. For New York, we construct stringency in granting stays and stringency in tenant receipt of emergency rental assistance in the 30 days after filing. The latter stringency measure aims to capture the idea that judges may differ in their propensity to encourage tenants to seek out emergency rental assistance, using data on receipt of emergency cash assistance. Across both locations, the eviction order stringency instrument is, at most, weakly correlated with other dimensions of judge behavior, lending confidence to the exclusion restriction holding in our settings.

Next, we examine how inclusion of alternative judge stringencies impacts the first stage relationship between eviction order and eviction order stringency. Table G.7 reports results the coefficient on eviction order stringency from a first stage with no other measures (columns 1 and 3), and then with the other stringencies included (columns 2 and 4). The first stage coefficients are largely unchanged when including other stringencies, consistent with the low correlation we find in Tables G.6 and G.8.

Given the relative salience of money judgments, we further explore the role of judge differences in these judgments in Cook County, where we are able to observe the money judgments included with an eviction order. First, we regress judgment amounts on eviction order stringency, shown in Table G.9. The estimates show that while judgment amount is strongly correlated with the ad damnum amount (the amount the landlord is seeking), it does not have a strong correlation with our main eviction order stringency measure. As we note in Section V, judgment amounts are very closely linked to the amount landlord requests (correlation of 0.8), implying that judge differences in setting money judgment amounts are unlikely to drive case outcomes. Nevertheless, we re-estimate our main housing and labor market outcomes for the Cook County in quarters 1-4 after filing including additional controls for judgment amount stringency (column 2) in Table G.10. The estimates lose some precision in column (2), but the point estimates are broadly aligned with the main estimates.

Taking all of these results together, we do not find evidence that the exclusion restriction is violated in our context.

**Table G.6: Correlation Between Various Judge Stringency Measures (Cook County)**

|                              | Eviction Order | Continuance | Amount | Stays |
|------------------------------|----------------|-------------|--------|-------|
| Stringency (eviction order)  | 1              | -0.065      | 0.101  | 0.081 |
| Stringency (continuance)     | -0.065         | 1           | 0.025  | 0.015 |
| Stringency (judgment amount) | 0.101          | 0.025       | 1      | 0.097 |
| Stringency (stays)           | 0.081          | 0.015       | 0.097  | 1     |

*Notes:* This table reports the correlation between judges' eviction order stringency and three other stringency measures in Cook County: stringency in granting continuances, stringency in judgment amount, and stringency in granting stays. Stringency measures are judge-year leave-one out averages. Judgment amount stringency is the leave-one-out average of the difference between judgment amounts and ad damnum amounts for cases ending in an eviction. We also calculate stringency related to granting stays of the eviction order among the cases ending in an eviction order.

**Table G.7: First Stage with Alternative Stringency**

|                        | Cook County         |                     | New York            |                     |
|------------------------|---------------------|---------------------|---------------------|---------------------|
|                        | (1)                 | (2)                 | (3)                 | (4)                 |
| Judge stringency       | 0.740***<br>(0.024) | 0.671***<br>(0.043) | 0.825***<br>(0.057) | 0.822***<br>(0.058) |
| Alternative stringency |                     | 0.003<br>(0.003)    |                     | 0.009<br>(0.027)    |
| Observations           | 268,000             | 215,000             | 150,662             | 150,662             |

*Notes:* This table reports results from the first stage regression of eviction on judge stringency, for Cook County and New York. Columns (1) and (3) include our main judge stringency measure and court-year fixed effects and controls. Columns (2) and (4) add a control for an additional dimension of judge stringency. In Cook County, this control is judgment amount stringency, while in New York, this control is judge stringency in granting stays of eviction orders, which allows tenants additional time before the city can perform the lockout. Judgment amount stringency is constructed using joint action cases that end in an eviction order (the only cases with a potential money judgment) and only for judges who see at least 100 of these cases, which leads to fewer observations in column (2). Judgment amount stringency is measured as the leave-one-out mean difference between the judgment amount and the ad damnum amount for each judge in each year. In New York, stay stringency is the leave-one-out mean likelihood of the judge in granting a stay of the eviction order. Standard errors are clustered at the judge(courtroom)-year level and are reported in parentheses. Cook County observation counts are rounded in accordance with Census Bureau disclosure requirements. Cook County results were approved for release by the U.S. Census Bureau, authorization number CBDRB-FY22-072.

**Table G.8: Correlation Between Various Judge Stringency Measures (New York)**

|                                   | Stringency | Stays   | Emergency Assistance |
|-----------------------------------|------------|---------|----------------------|
| Stringency (eviction order)       | 1          | 0.0457  | -0.058               |
| Stringency (stays)                | 0.0457     | 1       | -0.0821              |
| Stringency (emergency assistance) | -0.058     | -0.0821 | 1                    |

*Notes:* This table reports the correlation between judge’s eviction stringency and two other stringency measures in New York City. The first measure is stringency in granting stays and the second is the rate at which tenant’s assigned to the courtroom/judge receive “one-shot” emergency assistance from the city in the 30 days after their filing. All stringencies are judge-year leave-one-out averages.



**Table G.9: Regression of Log Judgment Amount on Eviction Order Stringency**

|                         | Log judgment amount |                     |                     |
|-------------------------|---------------------|---------------------|---------------------|
|                         | (1)                 | (2)                 | (3)                 |
| Eviction Stringency     | -0.154<br>(0.141)   | -0.091<br>(0.111)   | -0.098<br>(0.112)   |
| Log ad damnum           |                     | 0.774***<br>(0.003) | 0.743***<br>(0.003) |
| Constant                | 7.287***<br>(0.094) | 1.846***<br>(0.078) | 2.700***<br>(0.088) |
| Court $\times$ Year FEs |                     | ✓                   | ✓                   |
| All controls            |                     |                     | ✓                   |
| Observations            | 221,828             | 221,828             | 173,094             |

*Notes:* \*  $p < 0.1$ , \*\*  $p < 0.05$ , \*\*\*  $p < 0.01$ . This table shows estimates of a regression of log judgment amount on judge stringency in granting eviction orders for Cook County, and is restricted to joint action cases with positive ad damnum amounts.

**Table G.10: Robustness of IV Estimates to Controlling for Amount Stringency (Cook County)**

|                                              | IV                              | IV with Amount Stringency Control |
|----------------------------------------------|---------------------------------|-----------------------------------|
|                                              | (1)                             | (2)                               |
| <b>Housing:</b>                              |                                 |                                   |
| Not at eviction address                      | 0.093<br>(0.057)<br>[114,000]   | 0.038<br>(0.066)<br>[90,500]      |
| Emergency shelter                            | 0.023<br>(0.028)<br>[29,000]    | 0.033<br>(0.037)<br>[24,000]      |
| Any homelessness services                    | 0.012<br>(0.042)<br>[29,000]    | 0.054<br>(0.061)<br>[24,000]      |
| <b>Labor Market:</b>                         |                                 |                                   |
| Earnings                                     | -445*<br>(249)<br>[230,000]     | -421<br>(323)<br>[184,000]        |
| Employment                                   | 0.003<br>(0.027)<br>[232,000]   | 0.017<br>(0.033)<br>[186,000]     |
| <b>Financial Health:</b>                     |                                 |                                   |
| Financial health index                       | -0.202**<br>(0.102)<br>[83,335] | -0.331***<br>(0.108)<br>[67,318]  |
| Credit score                                 | -8.69<br>(8.29)<br>[91,394]     | -11.54<br>(9.51)<br>[73,931]      |
| No open revolving account                    | -0.072*<br>(0.043)<br>[92,028]  | -0.017<br>(0.052)<br>[74,397]     |
| Total balance: collections and delinquencies | 735<br>(659)<br>[83,537]        | 927<br>(831)<br>[67,467]          |
| Any auto loan or lease                       | -0.130**<br>(0.054)<br>[92,028] | -0.172***<br>(0.064)<br>[74,397]  |

*Notes:* \*  $p < 0.1$ , \*\*  $p < 0.05$ , \*\*\*  $p < 0.01$ . Column (1) shows the main IV estimates for labor market and housing outcomes in Cook County for quarters 1-4 after filing. Column (2) additionally controls for judgment amount stringency—which is the leave-one-out estimate of a judge’s stringency in judgment amount for joint action cases ending in eviction (constructed as the judgment amount minus the ad damnum amount). Results are only for Cook County, as judgment amount is not observed in New York. Standard errors for regression model coefficients are included in parentheses and are clustered at the judge-year level. Observation counts for each outcome and specification are shown in brackets under the standard errors. Cook County results were approved for release by the U.S. Census Bureau, authorization number CBDRB-FY22-072.

## *G.D Monotonicity*

We next provide evidence that the monotonicity assumption holds in our setting. Tables G.11 and G.12 report the first stage coefficient on judge stringency, running the first stage on the sample listed in the first column for each table. The first stage coefficient is positive for all sub-samples and is relatively stable across sub-samples. Following Bhuller et al. (2020) and Norris, Pecenco, and Weaver (2021), Table G.13 runs the first stage regression where judge stringency is calculated on one sub-population (e.g., women) and then runs the first-stage on the complementary sub-population (e.g., men).

To better test potential monotonicity violations, we hand-collected data on judge characteristics in Cook County, where we observe the judge name on the case. Using information from Sullivan’s Judicial Profiles (2017) supplemented with online sources, we compiled demographic information on over 150 judges who presided over most of the cases in our sample. For each judge, we determined gender based on the pronouns used in their respective biographies. Based on conversations with the people behind Sullivan’s Judicial Profiles, the biographies are created from surveys of judges, and the pronouns are based on judges’ responses.

Based on conversations with the Cook County law library officials, there are no references that provide consistent race data on judges, nor were there any references that contained pictures of all judges. Perceived race of judge was coded by research assistants using photos of the judges found online. For each judge, we required at least two different reputable sources that provide an image of the judge and also specifically mention the judge’s name in relation to the picture. Two research assistants compiled links to pages containing images of the judges, and then both research assistants independently coded the race of the judge based on the two pictures of the judges. The values are Black, white, Hispanic, and Asian.<sup>15</sup> If either research assistant was uncertain of the race based on the picture, race was coded as missing. There was no disagreement on race when pictures were available, and in many cases race was additionally confirmed in the associated text of the selected source. Perceived race was coded for 111 of the judges.<sup>16</sup>

Table G.14 shows the breakdown of judges by race and gender. In particular, we see that sub-sampling judges based on gender and on being white or Black provides us with enough data to adequately interact these characteristics with tenant characteristics. Each of these judge subsamples has at least 30 judges and over 100,000 cases in total. In contrast, the sample only includes 8 Hispanic judges and a combined caseload of less than 20,000 cases, suggesting that cross-interactions between Hispanic judges and tenant characteristics will suffer from small sample sizes and are therefore excluded below.

Table G.15 shows the coefficient for stringency from the regression of the case outcome on stringency and various controls, restricted to a number of different sub-populations that include interactions between tenant and judge characteristics. Restricting our focus to the

---

<sup>15</sup>Puerto Rican is coded as Hispanic.

<sup>16</sup>Only two of the judges considered were identified as Asian and are excluded from our analysis due to the small number of judges.

columns for male, female, white, and Black judges, we see that all interactions result in positive judge stringency coefficients (all statistically significant at the 0.01 level), supporting the monotonicity assumption.

**Table G.11: Monotonicity—Cook County**

| Sample            | Coefficient | Standard Errors | P-Value | Observations |
|-------------------|-------------|-----------------|---------|--------------|
| Joint Action      | 0.730       | 0.027           | < 0.001 | 359,025      |
| Single Action     | 1.160       | 0.084           | < 0.001 | 94,593       |
| Males             | 0.776       | 0.033           | < 0.001 | 195,190      |
| Females           | 0.856       | 0.033           | < 0.001 | 258,428      |
| No attorney       | 0.832       | 0.028           | < 0.001 | 436,740      |
| Attorney          | 0.512       | 0.159           | 0.001   | 16,878       |
| Black             | 0.884       | 0.036           | < 0.001 | 248,276      |
| Hispanic          | 0.905       | 0.081           | < 0.001 | 55,352       |
| Larger landlords  | 0.593       | 0.035           | < 0.001 | 299,674      |
| Smaller landlords | 1.144       | 0.053           | < 0.001 | 169,145      |

*Notes:* This table reports results from Cook County for the first-stage regressions of eviction on judge stringency. For each row, we calculate judge stringency using the analysis sample and run the first stage on the subsample listed. Standard errors are shown in the second column and are clustered at the judge(courtroom)-year level. “Larger landlords” are landlords who appear in the court records more than five times, while “Smaller landlords” are landlords who appear in the court records five or fewer times.

**Table G.12: Monotonicity—New York City**

| Sample         | Coefficient | Standard Error | P-Value | Observations |
|----------------|-------------|----------------|---------|--------------|
| Male           | 0.904       | (0.083)        | < 0.001 | 54,979       |
| Female         | 0.824       | (0.054)        | < 0.001 | 130,332      |
| Black          | 0.791       | (0.059)        | < 0.001 | 109,723      |
| Not Black      | 0.934       | (0.074)        | < 0.001 | 75,583       |
| First Case     | 0.866       | (0.074)        | < 0.001 | 98,806       |
| Not First Case | 0.813       | (0.057)        | < 0.001 | 86,494       |

*Notes:* This table reports results from New York for the first stage regressions of eviction on judge stringency. For each row, we calculate judge stringency using the analysis sample and run the first stage on the subsample listed. Standard errors are depicted in parentheses and are clustered at the courtroom-year level.

**Table G.13: Split-Sample Monotonicity Checks**

| Stringency Sample   | First Stage Sample  | Cook County<br>(1)  | New York<br>(2)     |
|---------------------|---------------------|---------------------|---------------------|
| Female              | Male                | 0.840***<br>(0.030) | 0.916***<br>(0.080) |
| Male                | Female              | 0.785***<br>(0.034) | 0.638***<br>(0.058) |
| Black               | Not Black           | 0.646***<br>(0.030) | 0.812***<br>(0.085) |
| Not Black           | Black               | 0.571***<br>(0.033) | 0.682***<br>(0.058) |
| Joint Action Case   | Single Action Case  | 0.363***<br>(0.018) | -                   |
| Single Action Case  | Joint Action Case   | 1.080***<br>(0.062) | -                   |
| Rent Stabilized     | Not Rent Stabilized |                     | 0.738***<br>(0.094) |
| Not Rent Stabilized | Rent Stabilized     |                     | 0.683***<br>(0.066) |
| Small Landlord      | Not Small Landlord  | 1.030***<br>(0.044) |                     |
| Not Small Landlord  | Small Landlord      | 0.384***<br>(0.021) |                     |

*Notes:* \*  $p < 0.1$ , \*\*  $p < 0.05$ , \*\*\*  $p < 0.01$ . For each city, this table reports results for first stage regressions of eviction on judge stringency. For each row, we calculate judge stringency using the subsample listed under “Stringency Sample”, and we run the first stage on the subsample listed under “First Stage Sample”. For example, the first row depicts a first stage on the sample of males, with our measure of judge stringency calculated based on the sample of females. “Joint action” is an indicator for if the case was a joint action case and is specific to Cook County. “Rent stabilized” is an indicator for if rent is stabilized, and is specific to NY. “Small landlord” is defined as landlords with fewer than five cases appearing in the court sample. Standard errors are depicted in parentheses and are clustered at the judge(courtroom)-year level.

**Table G.14: Cook County Judge Characteristics Breakdown**

| Sample                        | Male    | Female  | White   | Black   | Hispanic |
|-------------------------------|---------|---------|---------|---------|----------|
| Number of judges              | 104     | 56      | 74      | 29      | 6        |
| Number of total cases         | 331,966 | 123,978 | 203,982 | 180,858 | 17,599   |
| Stringency difference (10-90) | 0.072   | 0.076   | 0.075   | 0.078   | 0.033    |

*Notes:* Table shows characteristics of the judges most prevalent in the sample for Cook County. “Stringency difference (10-90)” reports the percentage point difference between the 10th and 90th percentile of judge stringency for each group.

**Table G.15: Cook County Monotonicity Checks, Two-Way Interactions**

| Pro Se Tenants | Male Judges | Female Judges | White Judges | Black Judges |
|----------------|-------------|---------------|--------------|--------------|
| All            | 0.799       | 0.793         | 0.716        | 0.788        |
| Male           | 0.737       | 0.823         | 0.676        | 0.805        |
| Female         | 0.845       | 0.771         | 0.743        | 0.777        |
| White          | 0.543       | 0.735         | 0.570        | 0.617        |
| Black          | 0.884       | 0.819         | 0.773        | 0.812        |
| Hispanic       | 0.895       | 0.954         | 0.909        | 0.922        |

*Notes:* The table above reports the coefficient on judge stringency by defendant characteristics interacted with characteristics of the judge for cases assigned to the most common judges in the data for Cook County. Sample is restricted to defendants without lawyers. “Black” and “Hispanic” are imputed using each defendant’s last name and census tract. Imputation defines a tenant as part of the group if the estimated posterior probability of being of that race is greater than 0.75. Sample is restricted to “pro se” tenants that have no formal legal representation.

## H *Appendix: Additional IV results*

### H.A *Heterogeneity on Observables*

This subsection presents an analysis of heterogeneity in the main estimates. We study heterogeneity by race, gender, and time period (Great Recession and non-Great Recession years).

In the paper, we report our main estimates for female and Black tenants. Table H.1 reproduces these estimates, and additionally includes the estimates for male and non-Black tenants. Table H.1 also provides tests of equality of the estimates for these subgroups. For most outcomes and time periods, we fail to reject a test of equality of differences, with a couple of notable exceptions. First, the impact of eviction on use of homelessness services in year 2 is significantly larger for women than men, and larger for Black tenants than non-Black tenants. This impact is seen in increased emergency shelter use by female tenants. Second, the negative impact on earnings is larger for women, and this pattern is seen across years 1 and 2, although it is not statistically significant at conventional levels. The negative impact on employment is larger for Black tenants than non-Black tenants, and this effect is statistically significant.

In the paper, we also report our main estimates for Cook County and New York separately. Table H.2 reproduces these estimates and provides tests of equality of the estimates across location. We fail to reject the null of equality for all outcomes in year 2, and all but two outcomes in year one. In year one, the difference in “any auto loan or lease” is statistically significant at the 5 percent level. This may partially be explained by different rates of car ownership in Cook County and New York though, given the point estimates are quite different, this likely could not account for the full difference. The difference between the financial health index is statistically significant at the 10 percent level. Given that “any auto loan or lease” is one of the four inputs into the financial health index, it may be driving both results.

Turning to heterogeneity by time period, we note that our main estimates cover a period that includes the Great Recession. An important question is whether the impact of eviction varies with business cycle conditions. We might expect the impact of eviction on earnings to be more negative during a recession if the negative impact of eviction is compounded by weaker labor market conditions. On the other hand, if demand for housing is lower, landlords may view potential tenants with an eviction record less negatively, and tenants may find housing more quickly, mitigating the negative impact of eviction.<sup>17</sup>

To explore heterogeneity with respect to business cycle conditions, we estimate the impact of eviction on earnings separately for Great Recession years (2008-2012) and non-Great Recession years in the sample. We provide estimates for quarters 1-4 and 5-8 after filing for earnings and financial health. The earnings estimates, presented in Table H.3, appear more negative in non-Great Recession years. The location-specific estimates, however, reveal

---

<sup>17</sup>For example, the literature on job displacement has found a more negative impact of job loss on future earnings during a recession (Davis and Wachter 2011).

a lack of precision after splitting the sample in Great Recession and non-Great Recession years, making it difficult to draw strong conclusions. Importantly, it doesn't appear as if the negative labor market effects that we find are specific to the Great Recession period, if anything, they appear more pronounced in non-Great Recession years.

Turning to the financial health results, Table H.4 shows that eviction may more strongly impact financial health for Cook County in quarters 1-4 in non-Great Recession years compared to Great Recession years.<sup>18</sup> However, looking at the components of the index, and comparing estimates in quarters 1-4 to those in quarters 5-8, the results are mixed and lack precision. Overall, we conclude that, if anything, the impacts of eviction on labor market and financial outcomes appear stronger in non-Great Recession years, which is consistent with the scarring impact of an eviction order being more muted during downturns. The analysis also reveals that the main impacts we report in the paper are not driven entirely by Great Recession years, which is reassuring for the broader conclusions of the paper.

---

<sup>18</sup>The NYC linked credit data file only covers filings starting in 2014, so it was not possible to investigate what the impacts would've been in the Great Recession



**Table H.1: Test of Equality Between Demographic Subgroups - IV Estimates**

|                            | 1-4 Quarters After Filing       |                                |                | 5-8 Quarters After Filing        |                                |                |
|----------------------------|---------------------------------|--------------------------------|----------------|----------------------------------|--------------------------------|----------------|
|                            | Female<br>(1)                   | Male<br>(2)                    | p-value<br>(3) | Female<br>(4)                    | Male<br>(5)                    | p-value<br>(6) |
| <b>By Gender</b>           |                                 |                                |                |                                  |                                |                |
| Earnings:                  | -504***<br>(185)<br>[246,907]   | 151<br>(432)<br>[126,974]      | 0.104          | -767***<br>(295)<br>[220,846]    | -284<br>(584)<br>[115,044]     | 0.411          |
| Employment:                | -0.036<br>(0.025)<br>[247,907]  | 0.034<br>(0.041)<br>[127,974]  | 0.125          | -0.003<br>(0.034)<br>[223,846]   | -0.069<br>(0.058)<br>[117,044] | 0.295          |
| Not at eviction address:   | 0.093**<br>(0.046)<br>[160,045] | 0.041<br>(0.071)<br>[80,238]   | 0.527          | 0.136**<br>(0.060)<br>[129,598]  | 0.031<br>(0.101)<br>[67,080]   | 0.342          |
| Emergency shelter:         | 0.024<br>(0.018)<br>[147,200]   | 0.053**<br>(0.026)<br>[63,629] | 0.369          | 0.024<br>(0.015)<br>[137,616]    | -0.050<br>(0.031)<br>[61,249]  | 0.015          |
| Any homelessness services: | 0.030<br>(0.023)<br>[147,200]   | 0.031<br>(0.036)<br>[63,629]   | 0.981          | 0.068***<br>(0.020)<br>[137,616] | -0.029<br>(0.031)<br>[61,249]  | 0.008          |
|                            | Black<br>(1)                    | Not Black<br>(2)               | p-value<br>(3) | Black<br>(4)                     | Not Black<br>(5)               | p-value<br>(6) |
| <b>By Race</b>             |                                 |                                |                |                                  |                                |                |
| Earnings:                  | -377<br>(234)<br>[245,625]      | -277<br>(335)<br>[128,758]     | 0.805          | -931***<br>(307)<br>[221,695]    | -405<br>(446)<br>[114,189]     | 0.325          |
| Employment:                | -0.059*<br>(0.031)<br>[246,625] | 0.043<br>(0.034)<br>[129,758]  | 0.039          | -0.089**<br>(0.040)<br>[224,695] | 0.075<br>(0.051)<br>[116,189]  | 0.014          |
| Not at eviction address:   | 0.066<br>(0.056)<br>[151,612]   | 0.064<br>(0.068)<br>[88,671]   | 0.982          | 0.098<br>(0.080)<br>[125,692]    | 0.126<br>(0.091)<br>[70,987]   | 0.825          |
| Emergency shelter:         | 0.036<br>(0.024)<br>[125,464]   | 0.030<br>(0.025)<br>[85,261]   | 0.866          | 0.007<br>(0.019)<br>[119,108]    | -0.014<br>(0.017)<br>[79,754]  | 0.438          |
| Any homelessness services: | 0.049*<br>(0.029)<br>[125,464]  | -0.005<br>(0.033)<br>[85,261]  | 0.225          | 0.057***<br>(0.022)<br>[119,108] | 0.002<br>(0.019)<br>[79,754]   | 0.077          |

*Notes:* \*  $p < 0.1$ , \*\*  $p < 0.05$ , \*\*\*  $p < 0.01$ . This table reports race and gender specific estimates for the main labor market and housing outcomes and tests if male and female coefficients are equal (top panel) and if Black and not Black coefficients are equal (bottom panel). Cook County results were approved for release by the U.S. Census Bureau, authorization number CBDRB-FY22-072.

**Table H.2: Test of Equality Between Locations - IV Estimates**

|                                               | 1-4 Quarters After Filing       |                                 |                | 5-8 Quarters After Filing       |                                |                |
|-----------------------------------------------|---------------------------------|---------------------------------|----------------|---------------------------------|--------------------------------|----------------|
|                                               | Cook<br>(1)                     | New York<br>(2)                 | p-value<br>(3) | Cook<br>(4)                     | New York<br>(5)                | p-value<br>(6) |
| <b>Labor market outcomes</b>                  |                                 |                                 |                |                                 |                                |                |
| Earnings:                                     | -445*<br>(249)<br>[230,000]     | -201<br>(245)<br>[144,400]      | 0.509          | -627*<br>(337)<br>[215,000]     | -599*<br>(363)<br>[121,396]    | 0.957          |
| Employment:                                   | 0.003<br>(0.027)<br>[232,000]   | -0.032<br>(0.032)<br>[144,400]  | 0.411          | -0.010<br>(0.030)<br>[219,000]  | -0.027<br>(0.046)<br>[121,396] | 0.748          |
| <b>Housing outcomes</b>                       |                                 |                                 |                |                                 |                                |                |
| Not at eviction address:                      | 0.093<br>(0.057)<br>[114,000]   | 0.071<br>(0.045)<br>[104,228]   | 0.765          | 0.074<br>(0.064)<br>[114,000]   | 0.149*<br>(0.084)<br>[69,227]  | 0.475          |
| Emergency shelter:                            | 0.023<br>(0.028)<br>[29,000]    | 0.046**<br>(0.019)<br>[181,840] | 0.638          | -0.019<br>(0.019)<br>[38,500]   | 0.016<br>(0.017)<br>[160,398]  | 0.330          |
| Any homelessness services:                    | 0.012<br>(0.042)<br>[29,000]    | 0.046**<br>(0.018)<br>[181,840] | 0.480          | 0.048**<br>(0.023)<br>[38,500]  | 0.024<br>(0.019)<br>[160,398]  | 0.552          |
| <b>Financial health outcomes</b>              |                                 |                                 |                |                                 |                                |                |
| Financial health index:                       | -0.202**<br>(0.102)<br>[83,335] | -0.012<br>(0.063)<br>[186,479]  | 0.102          | -0.230<br>(0.174)<br>[83,781]   | -0.053<br>(0.072)<br>[187,449] | 0.264          |
| Credit score:                                 | -8.69<br>(8.29)<br>[91,394]     | -7.03<br>(6.21)<br>[186,479]    | 0.876          | -24.16**<br>(11.15)<br>[91,184] | -8.90<br>(7.33)<br>[187,449]   | 0.243          |
| No open revolving account:                    | -0.072*<br>(0.043)<br>[92,028]  | -0.006<br>(0.025)<br>[186,479]  | 0.157          | 0.080<br>(0.099)<br>[91,762]    | 0.024<br>(0.027)<br>[187,449]  | 0.480          |
| Total balance: collections and delinquencies: | 735<br>(659)<br>[83,537]        | -115<br>(428)<br>[186,479]      | 0.274          | 739<br>(930)<br>[83,998]        | 357<br>(377)<br>[187,449]      | 0.649          |
| Any auto loan or lease:                       | -0.130**<br>(0.054)<br>[92,028] | 0.008<br>(0.027)<br>[186,479]   | 0.011          | 0.037<br>(0.066)<br>[91,762]    | 0.025<br>(0.026)<br>[187,449]  | 0.840          |

*Notes:* \*  $p < 0.1$ , \*\*  $p < 0.05$ , \*\*\*  $p < 0.01$ . This table reports location specific estimates for the main labor market, housing and financial health outcomes and tests if Cook County and New York coefficients are equal. Cook County results were approved for release by the U.S. Census Bureau, authorization number CBDRB-FY22-072.

**Table H.3: Great Recession Robustness: Earnings**

|                    | 1-4 Quarters After Filing  |                 |                              |                            |                 |                           | 5-8 Quarters After Filing  |                 |                              |                             |                 |                            |
|--------------------|----------------------------|-----------------|------------------------------|----------------------------|-----------------|---------------------------|----------------------------|-----------------|------------------------------|-----------------------------|-----------------|----------------------------|
|                    | Non-Great Recession        |                 |                              | Great Recession            |                 |                           | Non-Great Recession        |                 |                              | Great Recession             |                 |                            |
|                    | $\mathbb{E}[Y E=0]$<br>(1) | OLS<br>(2)      | IV<br>(3)                    | $\mathbb{E}[Y E=0]$<br>(4) | OLS<br>(5)      | IV<br>(6)                 | $\mathbb{E}[Y E=0]$<br>(7) | OLS<br>(8)      | IV<br>(9)                    | $\mathbb{E}[Y E=0]$<br>(10) | OLS<br>(11)     | IV<br>(12)                 |
| <b>Earnings:</b>   | 4,530<br>(3,822)           | -233***<br>(13) | -430**<br>(202)<br>[232,864] | 3,789<br>(3,724)           | -218***<br>(15) | 3<br>(357)<br>[141,036]   | 4,514<br>(3,917)           | -285***<br>(19) | -688**<br>(310)<br>[197,860] | 3,825<br>(3,812)            | -238***<br>(17) | -551<br>(414)<br>[139,036] |
| <i>By Location</i> |                            |                 |                              |                            |                 |                           |                            |                 |                              |                             |                 |                            |
| Cook County        | 4,950<br>(5,715)           | -308***<br>(15) | -502*<br>(289)<br>[148,000]  | 4,587<br>(5,972)           | -248***<br>(23) | -352<br>(480)<br>[81,500] | 4,959<br>(5,869)           | -351***<br>(21) | -572<br>(389)<br>[136,000]   | 4,587<br>(6,093)            | -271***<br>(27) | -820<br>(650)<br>[79,500]  |
| New York           | 4,109<br>(5,076)           | -158***<br>(20) | -375<br>(283)<br>[84,864]    | 2,991<br>(4,452)           | -187***<br>(19) | 358<br>(527)<br>[59,536]  | 4,070<br>(5,189)           | -219***<br>(31) | -805*<br>(482)<br>[61,860]   | 3,062<br>(4,584)            | -205***<br>(21) | -282<br>(512)<br>[59,536]  |

lxvii

*Notes:* The table above presents OLS and IV regressions studying the impact of eviction on several key short-run outcomes, separately by time period. We divide the data into a Great Recession time period (2008-2012) and all other sample years.

**Table H.4: Great Recession Robustness in Cook County: Financial Health**

|                                               | 1-4 Quarters After Filing  |                      |                                  |                            |                      |                                | 5-8 Quarters After Filing  |                      |                               |                             |                      |                                |
|-----------------------------------------------|----------------------------|----------------------|----------------------------------|----------------------------|----------------------|--------------------------------|----------------------------|----------------------|-------------------------------|-----------------------------|----------------------|--------------------------------|
|                                               | Non-Great Recession        |                      |                                  | Great Recession            |                      |                                | Non-Great Recession        |                      |                               | Great Recession             |                      |                                |
|                                               | $\mathbb{E}[Y E=0]$<br>(1) | OLS<br>(2)           | IV<br>(3)                        | $\mathbb{E}[Y E=0]$<br>(4) | OLS<br>(5)           | IV<br>(6)                      | $\mathbb{E}[Y E=0]$<br>(7) | OLS<br>(8)           | IV<br>(9)                     | $\mathbb{E}[Y E=0]$<br>(10) | OLS<br>(11)          | IV<br>(12)                     |
| Financial health index:                       | -0.032<br>(0.984)          | -0.147***<br>(0.009) | -0.362***<br>(0.118)<br>[30,633] | -0.102<br>(0.992)          | -0.115***<br>(0.011) | -0.060<br>(0.154)<br>[52,702]  | 0.016<br>(1.019)           | -0.162***<br>(0.010) | -0.086<br>(0.206)<br>[45,385] | -0.077<br>(0.979)           | -0.092***<br>(0.012) | -0.495<br>(0.361)<br>[38,396]  |
| Credit Score:                                 | 530.51<br>(73.64)          | -9.62***<br>(0.71)   | -1.35<br>(10.72)<br>[33,067]     | 532.80<br>(74.28)          | -8.92***<br>(0.77)   | -14.73<br>(11.91)<br>[58,327]  | 535.65<br>(75.79)          | -10.55***<br>(0.75)  | -16.15<br>(12.82)<br>[48,988] | 537.73<br>(73.12)           | -8.05***<br>(0.83)   | -42.86*<br>(24.90)<br>[42,196] |
| No open revolving account:                    | 0.556<br>(0.497)           | 0.047***<br>(0.004)  | -0.031<br>(0.063)<br>[33,312]    | 0.606<br>(0.486)           | 0.024***<br>(0.004)  | -0.107*<br>(0.057)<br>[58,716] | 0.552<br>(0.497)           | 0.054***<br>(0.005)  | -0.021<br>(0.125)<br>[49,305] | 0.632<br>(0.479)            | 0.010**<br>(0.005)   | 0.306*<br>(0.185)<br>[42,457]  |
| Total balance: collections and delinquencies: | 2,746<br>(5,572)           | 53<br>(64)           | 895<br>(903)<br>[30,711]         | 2,767<br>(5,462)           | 54<br>(44)           | 667<br>(936)<br>[52,826]       | 2,593<br>(5,424)           | -81<br>(52)          | 423<br>(1,071)<br>[45,478]    | 2,427<br>(5,131)            | 20<br>(53)           | 1,281<br>(1,821)<br>[38,520]   |
| Any auto loan or lease:                       | 0.216<br>(0.412)           | -0.044***<br>(0.004) | -0.293***<br>(0.080)<br>[33,312] | 0.186<br>(0.387)           | -0.037***<br>(0.003) | 0.016<br>(0.062)<br>[58,716]   | 0.219<br>(0.413)           | -0.057***<br>(0.004) | 0.073<br>(0.072)<br>[49,305]  | 0.173<br>(0.375)            | -0.036***<br>(0.004) | -0.046<br>(0.143)<br>[42,457]  |

*Notes:* The table above presents OLS and IV regressions studying the impact of eviction on several key short-run outcomes, separately by time period. We divide the data into a Great Recession time period (2008-2012) and all other sample years.

## ***H.B The Impacts of Eviction 3-4 and 5-6 Years after Filing***

This subsection reports the long-run effects of eviction on housing, labor market, and financial outcomes. We report estimates for housing outcomes in years 3-4 and 5-6 after filing, and the equivalent time periods for labor market and financial outcomes (quarters 9-16 and 17-24 after filing).

Table H.5 reports the long-run estimates for housing outcomes. The key takeaway is that the impact of eviction on moving residences diminishes in the long run and becomes statistically insignificant. This result is consistent with the interpretation that in the long run, the causal effect of the eviction order for marginal tenants is muted by the non-evicted group becoming more likely to move. The long-run estimates for homelessness are too imprecise to yield strong conclusions.

Table H.6 reports the long-run estimates for labor market outcomes. The IV estimates are diminished in magnitude relative to the short-run estimates, although again we note the imprecision and difficulty of drawing strong conclusions about the long-run effects from this analysis.

An interesting exception to this pattern is the analysis of financial outcomes, presented in Table H.7. In the 9-16 quarters after filing, the financial health index is -.206 standard deviations lower than the non-evicted group in the filing year, and this estimate becomes more negative in the long run, -.248 standard deviations lower. Both estimates are significant at the 5 percent level. These results are driven by a larger impact on credit score and unpaid bills in the 9-16 quarters after filing, and a negative impact on access to credit in the 17-24 quarters after filing, as seen in the impact on having no open source of revolving credit and on having an auto loan.

Taken as a whole, the long-run estimates show that while the housing and labor market effects appear to diminish in the long run, the negative impact on financial health and access to credit are longer lasting. These results show that an eviction has a negative impact on individuals' financial health that lasts years after the case concludes.

Table H.5: Housing Outcomes: Estimates 3-4 and 5-6 Years after Filing

|                                   | 3-4 Years After Filing     |                      |                                | 5-6 Years After Filing     |                     |                               |
|-----------------------------------|----------------------------|----------------------|--------------------------------|----------------------------|---------------------|-------------------------------|
|                                   | $\mathbb{E}[Y E=0]$<br>(1) | OLS<br>(2)           | IV<br>(3)                      | $\mathbb{E}[Y E=0]$<br>(4) | OLS<br>(5)          | IV<br>(6)                     |
| <b>Not at eviction address:</b>   | 0.666<br>(0.325)           | 0.123***<br>(0.003)  | 0.047<br>(0.059)<br>[162,540]  | 0.762<br>(0.298)           | 0.095***<br>(0.004) | 0.084<br>(0.063)<br>[134,428] |
| <i>By Location</i>                |                            |                      |                                |                            |                     |                               |
| Cook County                       | 0.773<br>(0.419)           | 0.045***<br>(0.003)  | -0.022<br>(0.056)              | 0.820<br>(0.384)           | 0.025***<br>(0.003) | 0.018<br>(0.054)              |
| New York                          | 0.560<br>(0.496)           | 0.201***<br>(0.006)  | 0.116<br>(0.104)               | 0.704<br>(0.456)           | 0.165***<br>(0.006) | 0.149<br>(0.114)              |
| <i>By Group</i>                   |                            |                      |                                |                            |                     |                               |
| Female                            | 0.656<br>(0.323)           | 0.131***<br>(0.004)  | 0.026<br>(0.061)               | 0.754<br>(0.299)           | 0.103***<br>(0.004) | 0.096<br>(0.069)              |
| Black                             | 0.656<br>(0.325)           | 0.133***<br>(0.004)  | 0.009<br>(0.071)               | 0.760<br>(0.298)           | 0.102***<br>(0.004) | 0.073<br>(0.075)              |
| <b>Neighborhood poverty rate:</b> | 0.243<br>(0.090)           | -0.000<br>(0.001)    | -0.015<br>(0.018)<br>[129,327] | 0.241<br>(0.092)           | 0.001<br>(0.001)    | 0.006<br>(0.022)<br>[105,182] |
| <i>By Location</i>                |                            |                      |                                |                            |                     |                               |
| Cook County                       | 0.195<br>(0.133)           | 0.003***<br>(0.001)  | 0.025<br>(0.021)               | 0.194<br>(0.135)           | 0.004***<br>(0.001) | 0.033*<br>(0.020)             |
| New York                          | 0.291<br>(0.123)           | -0.004***<br>(0.001) | -0.054*<br>(0.030)             | 0.288<br>(0.124)           | -0.001<br>(0.002)   | -0.020<br>(0.040)             |
| <i>By Group</i>                   |                            |                      |                                |                            |                     |                               |
| Female                            | 0.254<br>(0.091)           | -0.001<br>(0.001)    | -0.024<br>(0.025)              | 0.251<br>(0.092)           | 0.001<br>(0.001)    | -0.012<br>(0.035)             |
| Black                             | 0.263<br>(0.089)           | -0.003**<br>(0.001)  | -0.024<br>(0.030)              | 0.260<br>(0.090)           | -0.001<br>(0.001)   | -0.045<br>(0.039)             |
| <b>Emergency shelter:</b>         | 0.012<br>(0.078)           | 0.016***<br>(0.001)  | -0.012<br>(0.023)<br>[169,500] | 0.014<br>(0.083)           | 0.012***<br>(0.001) | 0.028<br>(0.025)<br>[122,925] |
| <i>By Location</i>                |                            |                      |                                |                            |                     |                               |
| Cook County                       | 0.009<br>(0.095)           | 0.010***<br>(0.001)  | 0.002<br>(0.027)               | 0.008<br>(0.087)           | 0.006***<br>(0.001) | 0.012<br>(0.018)              |
| New York                          | 0.016<br>(0.125)           | 0.023***<br>(0.001)  | -0.025<br>(0.038)              | 0.020<br>(0.141)           | 0.019***<br>(0.002) | 0.044<br>(0.047)              |
| <i>By Group</i>                   |                            |                      |                                |                            |                     |                               |
| Female                            | 0.012<br>(0.077)           | 0.017***<br>(0.001)  | 0.032<br>(0.027)               | 0.013<br>(0.080)           | 0.014***<br>(0.001) | 0.025<br>(0.030)              |
| Black                             | 0.015<br>(0.085)           | 0.018***<br>(0.001)  | -0.055*<br>(0.030)             | 0.018<br>(0.093)           | 0.013***<br>(0.001) | 0.019<br>(0.034)              |
| <b>Any homelessness services:</b> | 0.020<br>(0.100)           | 0.020***<br>(0.001)  | -0.022<br>(0.028)<br>[169,500] | 0.020<br>(0.100)           | 0.015***<br>(0.001) | 0.036<br>(0.030)<br>[122,925] |
| <i>By Location</i>                |                            |                      |                                |                            |                     |                               |
| Cook County                       | 0.023<br>(0.148)           | 0.014***<br>(0.001)  | -0.016<br>(0.037)              | 0.018<br>(0.132)           | 0.011***<br>(0.002) | 0.039<br>(0.030)              |
| New York                          | 0.018<br>(0.133)           | 0.025***<br>(0.001)  | -0.028<br>(0.041)              | 0.023<br>(0.150)           | 0.020***<br>(0.002) | 0.033<br>(0.051)              |
| <i>By Group</i>                   |                            |                      |                                |                            |                     |                               |
| Female                            | 0.020<br>(0.100)           | 0.021***<br>(0.001)  | 0.029<br>(0.031)               | 0.020<br>(0.100)           | 0.017***<br>(0.001) | 0.037<br>(0.037)              |
| Black                             | 0.025<br>(0.109)           | 0.022***<br>(0.001)  | -0.065*<br>(0.036)             | 0.026<br>(0.112)           | 0.017***<br>(0.002) | 0.038<br>(0.040)              |

Notes: \*  $p < 0.1$ , \*\*  $p < 0.05$ , \*\*\*  $p < 0.01$ . This table extends results from Tables IV and V for the periods 3-4 years after filing and 5-6 years after filing. Standard errors are clustered at the judge(courtroom)-year level, and shown in parentheses. Observation counts for the main combined specifications are reported below the standard errors in columns (3) and (6). Observation counts for all long-run OLS and IV regressions can be found in Appendix Table H.16. Cook County results were approved for release by the U.S. Census Bureau, authorization number CBDRB-FY22-072.

**Table H.6: Labor Market Outcomes: Estimates 9-16 and 17-24 Quarters after Filing**

|                    | 9-16 Quarters After Filing   |                      |                                | 17-24 Quarters After Filing  |                      |                                |
|--------------------|------------------------------|----------------------|--------------------------------|------------------------------|----------------------|--------------------------------|
|                    | $\mathbb{E}[Y E = 0]$<br>(1) | OLS<br>(2)           | IV<br>(3)                      | $\mathbb{E}[Y E = 0]$<br>(4) | OLS<br>(5)           | IV<br>(6)                      |
| <b>Earnings:</b>   | 4,168<br>(3,887)             | -290***<br>(14)      | -217<br>(316)<br>[298,552]     | 4,114<br>(3,975)             | -355***<br>(21)      | -237<br>(513)<br>[227,845]     |
| <i>By Location</i> |                              |                      |                                |                              |                      |                                |
| Cook County        | 4,877<br>(6,019)             | -344***<br>(19)      | -138<br>(330)                  | 4,933<br>(6,216)             | -424***<br>(27)      | -691<br>(521)                  |
| New York           | 3,460<br>(4,919)             | -235***<br>(20)      | -296<br>(538)                  | 3,294<br>(4,955)             | -286***<br>(32)      | 217<br>(885)                   |
| <i>By Group</i>    |                              |                      |                                |                              |                      |                                |
| Female             | 4,005<br>(3,605)             | -267***<br>(16)      | -253<br>(372)                  | 3,927<br>(3,666)             | -302***<br>(24)      | -252<br>(469)                  |
| Black              | 4,129<br>(3,693)             | -275***<br>(17)      | -438<br>(465)                  | 4,053<br>(3,767)             | -332***<br>(26)      | -268<br>(615)                  |
| <b>Employment:</b> | 0.527<br>(0.312)             | -0.019***<br>(0.001) | -0.019<br>(0.032)<br>[303,552] | 0.508<br>(0.314)             | -0.020***<br>(0.002) | -0.008<br>(0.051)<br>[232,845] |
| <i>By Location</i> |                              |                      |                                |                              |                      |                                |
| Cook County        | 0.607<br>(0.423)             | -0.013***<br>(0.002) | 0.034<br>(0.028)               | 0.599<br>(0.430)             | -0.013***<br>(0.002) | -0.008<br>(0.037)              |
| New York           | 0.447<br>(0.458)             | -0.024***<br>(0.002) | -0.072<br>(0.057)              | 0.416<br>(0.457)             | -0.027***<br>(0.003) | -0.008<br>(0.095)              |
| <i>By Group</i>    |                              |                      |                                |                              |                      |                                |
| Female             | 0.546<br>(0.310)             | -0.019***<br>(0.002) | -0.006<br>(0.040)              | 0.526<br>(0.313)             | -0.020***<br>(0.002) | 0.001<br>(0.056)               |
| Black              | 0.543<br>(0.311)             | -0.020***<br>(0.002) | -0.069<br>(0.047)              | 0.522<br>(0.313)             | -0.020***<br>(0.002) | -0.056<br>(0.061)              |

*Notes:* \*  $p < 0.1$ , \*\*  $p < 0.05$ , \*\*\*  $p < 0.01$ . This table extends results from Table VI for the periods 9-16 quarters after filing and 17-24 quarters after filing. Standard errors are clustered at the judge(courtroom)-year level, and shown in parentheses. Observation counts for the main combined specifications are reported below the standard errors in columns (3) and (6). Observation counts for all long-run OLS and IV regressions can be found in Appendix Table H.16. Cook County results were approved for release by the U.S. Census Bureau, authorization number CBDRB-FY22-072.

**Table H.7: Financial Health Outcomes: Estimates 9-16 and 17-24 Quarters after Filing**

|                                                      | 9-16 Quarters After Filing |                      |                                   | 17-24 Quarters After Filing |                      |                                  |
|------------------------------------------------------|----------------------------|----------------------|-----------------------------------|-----------------------------|----------------------|----------------------------------|
|                                                      | $\mathbb{E}[Y E=0]$<br>(1) | OLS<br>(2)           | IV<br>(3)                         | $\mathbb{E}[Y E=0]$<br>(4)  | OLS<br>(5)           | IV<br>(6)                        |
| <b>Financial health index:</b>                       | 0.077<br>(0.749)           | -0.103***<br>(0.004) | -0.214***<br>(0.066)<br>[306,223] | 0.180<br>(0.751)            | -0.106***<br>(0.005) | -0.262**<br>(0.124)<br>[197,230] |
| <i>By Location</i>                                   |                            |                      |                                   |                             |                      |                                  |
| Cook County                                          | 0.045<br>(0.997)           | -0.139***<br>(0.006) | -0.275***<br>(0.102)              | 0.166<br>(1.031)            | -0.145***<br>(0.006) | -0.212*<br>(0.117)               |
| New York                                             | 0.108<br>(1.117)           | -0.068***<br>(0.006) | -0.154*<br>(0.083)                | 0.195<br>(1.092)            | -0.067***<br>(0.008) | -0.313<br>(0.219)                |
| <b>Credit score:</b>                                 | 557.59<br>(67.14)          | -8.01***<br>(0.35)   | -16.78***<br>(6.29)               | 564.60<br>(73.66)           | -9.50***<br>(0.42)   | -14.30<br>(12.98)                |
| <i>By Location</i>                                   |                            |                      |                                   |                             |                      |                                  |
| Cook County                                          | 543.01<br>(75.70)          | -8.84***<br>(0.40)   | -18.01**<br>(8.42)                | 552.06<br>(79.55)           | -9.58***<br>(0.43)   | -5.90<br>(9.18)                  |
| New York                                             | 572.17<br>(110.90)         | -7.18***<br>(0.57)   | -15.55*<br>(9.34)                 | 577.14<br>(124.00)          | -9.41***<br>(0.73)   | -22.70<br>(24.28)                |
| <b>No open revolving account:</b>                    | 0.453<br>(0.322)           | 0.037***<br>(0.002)  | 0.045<br>(0.034)                  | 0.430<br>(0.334)            | 0.036***<br>(0.003)  | 0.093*<br>(0.056)                |
| <i>By Location</i>                                   |                            |                      |                                   |                             |                      |                                  |
| Cook County                                          | 0.579<br>(0.489)           | 0.041***<br>(0.003)  | 0.038<br>(0.054)                  | 0.541<br>(0.496)            | 0.043***<br>(0.003)  | 0.060<br>(0.075)                 |
| New York                                             | 0.327<br>(0.421)           | 0.034***<br>(0.002)  | 0.053<br>(0.041)                  | 0.318<br>(0.447)            | 0.029***<br>(0.004)  | 0.126<br>(0.082)                 |
| <b>Total balance: collections and delinquencies:</b> | 2,212<br>(3,584)           | 50**<br>(21)         | 847**<br>(335)                    | 2,113<br>(3,870)            | 44<br>(27)           | 730<br>(730)                     |
| <i>By Location</i>                                   |                            |                      |                                   |                             |                      |                                  |
| Cook County                                          | 2,199<br>(4,956)           | 30<br>(29)           | 1,234**<br>(535)                  | 2,064<br>(4,890)            | 34<br>(34)           | -56<br>(697)                     |
| New York                                             | 2,226<br>(5,179)           | 70**<br>(31)         | 460<br>(404)                      | 2,162<br>(6,000)            | 54<br>(42)           | 1,516<br>(1,283)                 |
| <b>Any auto loan or lease:</b>                       | 0.201<br>(0.282)           | -0.026***<br>(0.001) | -0.029<br>(0.028)                 | 0.202<br>(0.283)            | -0.024***<br>(0.002) | -0.083*<br>(0.045)               |
| <i>By Location</i>                                   |                            |                      |                                   |                             |                      |                                  |
| Cook County                                          | 0.193<br>(0.391)           | -0.048***<br>(0.002) | -0.050<br>(0.046)                 | 0.212<br>(0.407)            | -0.046***<br>(0.002) | -0.177***<br>(0.058)             |
| New York                                             | 0.208<br>(0.406)           | -0.004*<br>(0.002)   | -0.009<br>(0.034)                 | 0.191<br>(0.393)            | -0.002<br>(0.003)    | 0.011<br>(0.068)                 |

Notes: \*  $p < 0.1$ , \*\*  $p < 0.05$ , \*\*\*  $p < 0.01$ . This table extends results from Table VII for the periods 9-16 quarters after filing and 17-24 quarters after filing. Standard errors are clustered at the judge(courtroom)-year level, and shown in parentheses. Observation counts for the main combined specifications are reported below the standard errors in columns (3) and (6) in the top panel. Observation counts for all long-run OLS and IV regressions can be found in Appendix Table H.16.



**Table H.8: Hospital Outcomes: Estimates 9-16 Quarters after Filing**

|                                | 9-16 Quarters After Filing   |                     |                   |
|--------------------------------|------------------------------|---------------------|-------------------|
|                                | $\mathbb{E}[Y E = 0]$<br>(1) | OLS<br>(2)          | IV<br>(3)         |
| Number of hospital visits      | 1.330<br>(3.670)             | 0.116***<br>(0.028) | -0.162<br>(0.881) |
| Number of emergency visits     | 1.071<br>(3.238)             | 0.087***<br>(0.024) | -0.440<br>(0.753) |
| Number of mental health visits | 0.094<br>(0.982)             | 0.039***<br>(0.009) | 0.057<br>(0.278)  |
|                                |                              |                     | [82,719]          |

*Notes:* \*  $p < 0.1$ , \*\*  $p < 0.05$ , \*\*\*  $p < 0.01$ . This table extends results from Table VIII for the period 9-16 quarters after filing. Standard errors are clustered at the judge(courtroom)-year level, and shown in parentheses. Observation counts for all regressions are reported below the standard errors in column (6).

## H.C Additional Outcomes

Table H.9 reports IV and OLS results on the impact of eviction on future eviction at the same address. This outcome allows us to better characterize what happens in the future for tenants in court who avoid an eviction order. The table reports estimates for new eviction cases at the same address within one year, and within two years. The main takeaway is that being evicted reduces the likelihood of a future eviction at the same address by 9.5pp in year 1, and by 11.9pp in years 1 or 2. It is unsurprising that eviction decreases the likelihood of eviction at the same address, since tenants are legally obligated to move after eviction. What is notable is that the non-evicted mean is 8.8pp in the year 1 and 13.9pp within 2 years. Hence, while non-evicted tenants face some probability of a future eviction at the same address, the probability is modest.

**Table H.9: Impact of Eviction on Future Eviction**

|                         | 1 Year After Filing        |                      |                                   | 2 Years After Filing       |                      |                                   |
|-------------------------|----------------------------|----------------------|-----------------------------------|----------------------------|----------------------|-----------------------------------|
|                         | $\mathbb{E}[Y E=0]$<br>(1) | OLS<br>(2)           | IV<br>(3)                         | $\mathbb{E}[Y E=0]$<br>(4) | OLS<br>(5)           | IV<br>(6)                         |
| <b>Future eviction:</b> | 0.088<br>(0.200)           | -0.047***<br>(0.001) | -0.095***<br>(0.015)<br>[911,564] | 0.139<br>(0.244)           | -0.072***<br>(0.001) | -0.119***<br>(0.021)<br>[859,314] |
| <i>By Location</i>      |                            |                      |                                   |                            |                      |                                   |
| Cook County             | 0.095<br>(0.294)           | -0.048***<br>(0.001) | -0.141***<br>(0.018)              | 0.124<br>(0.329)           | -0.062***<br>(0.002) | -0.184***<br>(0.019)              |
| New York                | 0.080<br>(0.271)           | -0.046***<br>(0.001) | -0.048**<br>(0.024)               | 0.154<br>(0.361)           | -0.082***<br>(0.002) | -0.054<br>(0.037)                 |
| <i>By Group</i>         |                            |                      |                                   |                            |                      |                                   |
| Female                  | 0.089<br>(0.202)           | -0.047***<br>(0.001) | -0.092***<br>(0.019)              | 0.142<br>(0.247)           | -0.074***<br>(0.002) | -0.113***<br>(0.025)              |
| Black                   | 0.097<br>(0.209)           | -0.054***<br>(0.001) | -0.103***<br>(0.022)              | 0.153<br>(0.254)           | -0.084***<br>(0.002) | -0.126***<br>(0.034)              |

*Notes:* \*  $p < 0.1$ , \*\*  $p < 0.05$ , \*\*\*  $p < 0.01$ . This table reports equally-weighted averages of Cook County and New York non-evicted sample means ( $\mathbb{E}[Y|E=0]$ ), as well as equally-weighted averages of location-specific OLS and two-stage least squares (IV) estimates of the impact of eviction on future eviction at the same address. Below the combined estimates, we report estimates separately for each location and for the female and Black subsamples. “Future eviction” is an indicator for if the individual has a future eviction at the same address. The outcome is defined cumulatively so that for columns (4)-(6) the outcome is an indicator for a future eviction in either the first or second year after filing. Each regression includes the main controls listed in Table IV. Standard errors are in parentheses and are clustered at the judge(courtroom)-year level. Observations for the main combined specifications are reported in brackets below the standard errors in columns (3) and (6). Other observation counts for all regressions shown above can be found in Appendix Table H.15.

## H.D Reduced Form Estimates

This subsection provides reduced-form estimates for the IV results presented in Tables IV-VIII.

**Table H.10: Reduced Form for Table IV: Impacts of Eviction on Housing Situation**

|                                   | 1 Year After Filing          |                                  | 2 Years After Filing         |                                  |
|-----------------------------------|------------------------------|----------------------------------|------------------------------|----------------------------------|
|                                   | $\mathbb{E}[Y E = 0]$<br>(1) | RF<br>(2)                        | $\mathbb{E}[Y E = 0]$<br>(3) | RF<br>(4)                        |
| <b>Enforcement:</b>               | 0.002<br>(0.031)             | 0.332***<br>(0.028)<br>[329,279] | 0.002<br>(0.032)             | 0.324***<br>(0.028)<br>[307,837] |
| <i>By Location</i>                |                              |                                  |                              |                                  |
| Cook County                       | 0.004<br>(0.059)             | 0.357***<br>(0.041)              | 0.004<br>(0.062)             | 0.350***<br>(0.040)              |
| New York                          | 0.000<br>(0.017)             | 0.307***<br>(0.039)              | 0.000<br>(0.018)             | 0.297***<br>(0.038)              |
| <i>By Group</i>                   |                              |                                  |                              |                                  |
| Female                            | 0.002<br>(0.030)             | 0.333***<br>(0.038)              | 0.002<br>(0.032)             | 0.329***<br>(0.038)              |
| Black                             | 0.002<br>(0.032)             | 0.378***<br>(0.036)              | 0.002<br>(0.035)             | 0.357***<br>(0.036)              |
| <b>Not at eviction address:</b>   | 0.293<br>(0.318)             | 0.063**<br>(0.027)<br>[218,228]  | 0.478<br>(0.348)             | 0.083**<br>(0.040)<br>[183,227]  |
| <i>By Location</i>                |                              |                                  |                              |                                  |
| Cook County                       | 0.363<br>(0.481)             | 0.065*<br>(0.039)                | 0.568<br>(0.495)             | 0.052<br>(0.045)                 |
| New York                          | 0.222<br>(0.415)             | 0.060<br>(0.038)                 | 0.389<br>(0.487)             | 0.115*<br>(0.065)                |
| <i>By Group</i>                   |                              |                                  |                              |                                  |
| Female                            | 0.280<br>(0.312)             | 0.070**<br>(0.034)               | 0.461<br>(0.343)             | 0.100**<br>(0.045)               |
| Black                             | 0.272<br>(0.310)             | 0.047<br>(0.040)                 | 0.454<br>(0.345)             | 0.068<br>(0.056)                 |
| <b>Neighborhood poverty rate:</b> | 0.247<br>(0.088)             | -0.001<br>(0.007)<br>[173,909]   | 0.246<br>(0.090)             | -0.007<br>(0.011)<br>[127,891]   |
| <i>By Location</i>                |                              |                                  |                              |                                  |
| Cook County                       | 0.195<br>(0.130)             | -0.010<br>(0.013)                | 0.196<br>(0.133)             | 0.008<br>(0.015)                 |
| New York                          | 0.298<br>(0.120)             | 0.007<br>(0.006)                 | 0.295<br>(0.123)             | -0.023<br>(0.016)                |
| <i>By Group</i>                   |                              |                                  |                              |                                  |
| Female                            | 0.258<br>(0.090)             | -0.003<br>(0.009)                | 0.256<br>(0.091)             | -0.007<br>(0.014)                |
| Black                             | 0.267<br>(0.088)             | -0.004<br>(0.010)                | 0.266<br>(0.090)             | -0.020<br>(0.016)                |

*Notes:* \*  $p < 0.1$ , \*\*  $p < 0.05$ , \*\*\*  $p < 0.01$ . This table reports equally-weighted averages of Cook County and New York non-evicted sample means ( $\mathbb{E}[Y|E = 0]$ ), and reduced form (RF) estimates of the impact of eviction on outcomes related to the tenant's housing situation. Outcomes are listed on the left of each row. Results are shown for 1-4 quarters (columns (1)-(3)) and for 5-8 quarters (columns (4)-(6)) after the eviction case is filed. Each panel shows results for a given outcome. Below the combined estimates in each panel, we report estimates separately for each location and for the female and Black subsamples. These RF estimates correspond to the IV estimates from Table IV, and controls are the same as those for the IV estimates in Table IV. Standard errors for regression model coefficients are included in parentheses and are clustered at the judge(courtroom)-year level. Observations for the main combined specifications are reported in brackets below the standard errors in columns (3) and (6). Observation counts for all RF regressions can be found in Appendix Table H.15. Cook County results were approved for release by the U.S. Census Bureau, authorization number CBDRB-FY22-072.

**Table H.11: Reduced Form for Table V: Impacts of Eviction on Homelessness Services**

|                                   | 1 Year After Filing          |                                 | 2 Years After Filing         |                                 |
|-----------------------------------|------------------------------|---------------------------------|------------------------------|---------------------------------|
|                                   | $\mathbb{E}[Y E = 0]$<br>(1) | RF<br>(2)                       | $\mathbb{E}[Y E = 0]$<br>(3) | RF<br>(4)                       |
| <b>Emergency shelter:</b>         | 0.009<br>(0.068)             | 0.027**<br>(0.013)<br>[210,840] | 0.008<br>(0.062)             | -0.000<br>(0.009)<br>[198,898]  |
| <i>By Location</i>                |                              |                                 |                              |                                 |
| Cook County                       | 0.007<br>(0.086)             | 0.016<br>(0.020)                | 0.006<br>(0.077)             | -0.013<br>(0.013)               |
| New York                          | 0.011<br>(0.105)             | 0.038**<br>(0.016)              | 0.009<br>(0.097)             | 0.012<br>(0.013)                |
| <i>By Group</i>                   |                              |                                 |                              |                                 |
| Female                            | 0.009<br>(0.066)             | 0.019<br>(0.013)                | 0.008<br>(0.061)             | 0.018<br>(0.011)                |
| Black                             | 0.010<br>(0.072)             | 0.026<br>(0.017)                | 0.009<br>(0.068)             | 0.005<br>(0.013)                |
| <b>Any homelessness services:</b> | 0.015<br>(0.086)             | 0.024<br>(0.017)<br>[210,840]   | 0.012<br>(0.076)             | 0.026**<br>(0.011)<br>[198,898] |
| <i>By Location</i>                |                              |                                 |                              |                                 |
| Cook County                       | 0.017<br>(0.128)             | 0.009<br>(0.030)                | 0.012<br>(0.110)             | 0.033**<br>(0.016)              |
| New York                          | 0.013<br>(0.114)             | 0.038**<br>(0.015)              | 0.011<br>(0.104)             | 0.019<br>(0.014)                |
| <i>By Group</i>                   |                              |                                 |                              |                                 |
| Female                            | 0.015<br>(0.086)             | 0.023<br>(0.016)                | 0.012<br>(0.077)             | 0.049***<br>(0.014)             |
| Black                             | 0.017<br>(0.092)             | 0.035*<br>(0.021)               | 0.014<br>(0.083)             | 0.038**<br>(0.015)              |

*Notes:* \*  $p < 0.1$ , \*\*  $p < 0.05$ , \*\*\*  $p < 0.01$ . This table reports equally-weighted averages of Cook County and New York non-evicted sample means ( $\mathbb{E}[Y|E = 0]$ ), and reduced form (RF) estimates of the impact of eviction on outcomes related to the tenant's homelessness situation. Outcomes are listed on the left of each row. Results are shown for 1-4 quarters (columns (1)-(3)) and for 5-8 quarters (columns (4)-(6)) after the eviction case is filed. Each panel shows results for a given outcome. Below the combined estimates in each panel, we report estimates separately for each location and for the female and Black subsamples. These RF estimates correspond to the IV estimates from Table V, and controls are the same as those for the IV estimates in Table V. Standard errors for regression model coefficients are included in parentheses and are clustered at the judge(courtroom)-year level. Observations for the main combined specifications are reported in brackets below the standard errors in columns (3) and (6). Observation counts for all RF regressions can be found in Appendix Table H.15. Cook County results were approved for release by the U.S. Census Bureau, authorization number CBDRB-FY22-072.

**Table H.12: Reduced Form for Table VI: Impacts of Eviction on Labor Outcomes**

|                    | 1-4 Quarters After Filing    |                                | 5-8 Quarters After Filing    |                                |
|--------------------|------------------------------|--------------------------------|------------------------------|--------------------------------|
|                    | $\mathbb{E}[Y E = 0]$<br>(1) | RF<br>(2)                      | $\mathbb{E}[Y E = 0]$<br>(3) | RF<br>(4)                      |
| <b>Earnings:</b>   | 4,300<br>(3,809)             | -251*<br>(139)<br>[374,400]    | 4,254<br>(3,885)             | -453**<br>(186)<br>[336,396]   |
| <i>By Location</i> |                              |                                |                              |                                |
| Cook County        | 4,821<br>(5,810)             | -331*<br>(185)                 | 4,821<br>(5,956)             | -470*<br>(254)                 |
| New York           | 3,779<br>(4,926)             | -171<br>(208)                  | 3,687<br>(4,991)             | -436<br>(273)                  |
| <i>By Group</i>    |                              |                                |                              |                                |
| Female             | 4,136<br>(3,545)             | -408***<br>(146)               | 4,094<br>(3,610)             | -573**<br>(223)                |
| Black              | 4,319<br>(3,664)             | -302<br>(185)                  | 4,252<br>(3,718)             | -680***<br>(234)               |
| <b>Employment:</b> | 0.565<br>(0.317)             | -0.013<br>(0.017)<br>[376,400] | 0.549<br>(0.322)             | -0.013<br>(0.020)<br>[340,396] |
| <i>By Location</i> |                              |                                |                              |                                |
| Cook County        | 0.623<br>(0.432)             | 0.002<br>(0.020)               | 0.613<br>(0.438)             | -0.007<br>(0.022)              |
| New York           | 0.507<br>(0.465)             | -0.028<br>(0.027)              | 0.485<br>(0.471)             | -0.019<br>(0.034)              |
| <i>By Group</i>    |                              |                                |                              |                                |
| Female             | 0.585<br>(0.315)             | -0.030<br>(0.020)              | 0.568<br>(0.320)             | -0.001<br>(0.026)              |
| Black              | 0.583<br>(0.316)             | -0.048**<br>(0.024)            | 0.566<br>(0.321)             | -0.065**<br>(0.029)            |

*Notes:* \*  $p < 0.1$ , \*\*  $p < 0.05$ , \*\*\*  $p < 0.01$ . This table reports equally-weighted averages of Cook County and New York non-evicted sample means ( $\mathbb{E}[Y|E = 0]$ ), and reduced form (RF) estimates of the impact of eviction on the tenant's labor outcomes. Outcomes are listed on the left of each row. Results are shown for 1-4 quarters (columns (1)-(3)) and for 5-8 quarters (columns (4)-(6)) after the eviction case is filed. Each panel shows results for a given outcome. Below the combined estimates in each panel, we report estimates separately for each location and for the female and Black subsamples. These RF estimates correspond to the IV estimates from Table VI, and controls are the same as those for the IV estimates in Table VI. Standard errors for regression model coefficients are included in parentheses and are clustered at the judge(courtroom)-year level. Observations for the main combined specifications are reported in brackets below the standard errors in columns (3) and (6). Observation counts for all RF regressions can be found in Appendix Table H.15. Cook County results were approved for release by the U.S. Census Bureau, authorization number CBDRB-FY22-072.

**Table H.13: Reduced Form for Table VII: Impacts of Eviction on Financial Health**

|                                                      | 1-4 Quarters After Filing    |                                 | 5-8 Quarters After Filing    |                                |
|------------------------------------------------------|------------------------------|---------------------------------|------------------------------|--------------------------------|
|                                                      | $\mathbb{E}[Y E = 0]$<br>(1) | RF<br>(2)                       | $\mathbb{E}[Y E = 0]$<br>(3) | RF<br>(4)                      |
| <b>Financial health index:</b>                       | -0.054<br>(0.737)            | -0.086*<br>(0.050)<br>[269,814] | 0.008<br>(0.747)             | -0.092<br>(0.062)<br>[271,230] |
| <i>By Location</i>                                   |                              |                                 |                              |                                |
| Cook County                                          | -0.075<br>(0.990)            | -0.162*<br>(0.083)              | -0.027<br>(1.002)            | -0.137<br>(0.108)              |
| New York                                             | -0.032<br>(1.091)            | -0.011<br>(0.056)               | 0.043<br>(1.108)             | -0.046<br>(0.063)              |
| <b>Credit score:</b>                                 | 547.59<br>(67.11)            | -6.41<br>(4.23)                 | 551.84<br>(68.61)            | -11.36**<br>(4.75)             |
| <i>By Location</i>                                   |                              |                                 |                              |                                |
| Cook County                                          | 531.94<br>(74.04)            | -6.64<br>(6.43)                 | 536.62<br>(74.56)            | -14.90**<br>(7.01)             |
| New York                                             | 563.24<br>(111.94)           | -6.18<br>(5.48)                 | 567.06<br>(115.19)           | -7.82<br>(6.41)                |
| <b>No open revolving account:</b>                    | 0.481<br>(0.334)             | -0.030<br>(0.020)               | 0.468<br>(0.331)             | 0.035<br>(0.032)               |
| <i>By Location</i>                                   |                              |                                 |                              |                                |
| Cook County                                          | 0.587<br>(0.491)             | -0.056*<br>(0.033)              | 0.589<br>(0.491)             | 0.048<br>(0.059)               |
| New York                                             | 0.375<br>(0.452)             | -0.005<br>(0.022)               | 0.347<br>(0.445)             | 0.021<br>(0.024)               |
| <b>Total balance: collections and delinquencies:</b> | 2,550<br>(4,099)             | 246<br>(327)                    | 2,378<br>(3,936)             | 382<br>(333)                   |
| <i>By Location</i>                                   |                              |                                 |                              |                                |
| Cook County                                          | 2,759<br>(5,504)             | 593<br>(535)                    | 2,516<br>(5,291)             | 450<br>(577)                   |
| New York                                             | 2,342<br>(6,075)             | -101<br>(375)                   | 2,240<br>(5,829)             | 313<br>(332)                   |
| <b>Any auto loan or lease:</b>                       | 0.170<br>(0.264)             | -0.047*<br>(0.024)              | 0.176<br>(0.269)             | 0.022<br>(0.023)               |
| <i>By Location</i>                                   |                              |                                 |                              |                                |
| Cook County                                          | 0.197<br>(0.396)             | -0.101**<br>(0.042)             | 0.198<br>(0.397)             | 0.022<br>(0.040)               |
| New York                                             | 0.142<br>(0.349)             | 0.007<br>(0.024)                | 0.155<br>(0.362)             | 0.022<br>(0.023)               |

*Notes:* \*  $p < 0.1$ , \*\*  $p < 0.05$ , \*\*\*  $p < 0.01$ . This table reports equally-weighted averages of Cook County and New York non-evicted sample means ( $\mathbb{E}[Y|E = 0]$ ), and reduced form (RF) estimates of the impact of eviction on outcomes related to the tenant's financial health. Outcomes are listed on the left of each row. Results are shown for 1-4 quarters (columns (1)-(3)) and for 5-8 quarters (columns (4)-(6)) after the eviction case is filed. Each panel shows results for a given outcome. Below the combined estimates in each panel, we report estimates separately for each location and for the female and Black subsamples. These RF estimates correspond to the IV estimates from Table VII, and controls are the same as those for the IV estimates in Table VII. Standard errors for regression model coefficients are included in parentheses and are clustered at the judge(courtroom)-year level. Observations for the main combined specifications are reported in brackets below the standard errors in columns (3) and (6), in the top panel. Observation counts for all RF regressions can be found in Appendix Table H.15.

**Table H.14: Reduced Form for Table VIII: Impacts of Eviction on Hospital Use**

|                                | 1-4 Quarters After Filing    |                                 | 5-8 Quarters After Filing    |                                |
|--------------------------------|------------------------------|---------------------------------|------------------------------|--------------------------------|
|                                | $\mathbb{E}[Y E = 0]$<br>(1) | RF<br>(2)                       | $\mathbb{E}[Y E = 0]$<br>(3) | RF<br>(4)                      |
| Number of hospital visits      | 0.739<br>(1.321)             | 0.161**<br>(0.072)              | 0.632<br>(1.208)             | -0.079<br>(0.105)              |
| Number of emergency visits     | 0.588<br>(1.091)             | 0.090<br>(0.070)                | 0.511<br>(1.010)             | -0.049<br>(0.090)              |
| Number of mental health visits | 0.047<br>(0.295)             | 0.049**<br>(0.023)<br>[179,024] | 0.045<br>(0.346)             | -0.026<br>(0.039)<br>[154,531] |

*Notes:* \*  $p < 0.1$ , \*\*  $p < 0.05$ , \*\*\*  $p < 0.01$ . This table reports the the impacts of eviction on hospital use in New York. The table includes the non-evicted sample means ( $\mathbb{E}[Y|E = 0]$ ), and reduced form (RF) estimates of the impact of eviction on the tenant’s hospital use in New York only. Outcomes are listed on the left of each row. Results are shown for 1-4 quarters (columns (1)-(3)) and for 5-8 quarters (columns (4)-(6)) after the eviction case is filed. Controls for all model specifications are the same as those described in Table IV. Standard errors for regression model coefficients are included in parentheses and are clustered at the judge(courtroom)-year level. Observation counts for all outcomes are listed at the bottom of the table, in brackets. These RF estimates correspond to the IV estimates from Table VIII.

## ***H.E Number of Observations***

This subsection provides the number of observations for each regression result from the OLS, IV, and RF specifications. Note that Cook County's observations are rounded following the requirements of the U.S. Census Bureau.



**Table H.15: Observation Counts for RF, IV and OLS Regressions - Estimates  
1-2 Years (1-8 Quarters) after Filing**

|                                               | 1-4 Quarters (1 Year) After Filing |             |           |               |              | 5-8 Quarters (2 Years) After Filing |             |           |               |               |
|-----------------------------------------------|------------------------------------|-------------|-----------|---------------|--------------|-------------------------------------|-------------|-----------|---------------|---------------|
|                                               | All<br>(1)                         | Cook<br>(2) | NY<br>(3) | Female<br>(4) | Black<br>(5) | All<br>(6)                          | Cook<br>(7) | NY<br>(8) | Female<br>(9) | Black<br>(10) |
| <b><u>Housing outcomes:</u></b>               |                                    |             |           |               |              |                                     |             |           |               |               |
| Enforcement:                                  | 329,279                            | 147,439     | 181,840   | 203,943       | 182,063      | 307,837                             | 147,439     | 160,398   | 188,359       | 169,207       |
| Not at eviction address:                      | 218,228                            | 114,000     | 104,228   | 160,045       | 151,612      | 183,227                             | 114,000     | 69,227    | 129,598       | 125,692       |
| Neighborhood poverty rate:                    | 173,909                            | 73,500      | 100,409   | 108,860       | 100,524      | 127,891                             | 72,000      | 55,891    | 82,107        | 78,088        |
| Emergency shelter:                            | 210,840                            | 29,000      | 181,840   | 147,200       | 125,464      | 198,898                             | 38,500      | 160,398   | 137,616       | 119,108       |
| Any homelessness services:                    | 210,840                            | 29,000      | 181,840   | 147,200       | 125,464      | 198,898                             | 38,500      | 160,398   | 137,616       | 119,108       |
| Future eviction:                              | 911,564                            | 551,603     | 359,961   | 518,736       | 443,077      | 859,314                             | 525,430     | 333,884   | 489,601       | 418,395       |
| <b><u>Labor market outcomes:</u></b>          |                                    |             |           |               |              |                                     |             |           |               |               |
| Earnings:                                     | 374,400                            | 230,000     | 144,400   | 246,907       | 245,625      | 336,396                             | 215,000     | 121,396   | 220,846       | 221,695       |
| Employment:                                   | 376,400                            | 232,000     | 144,400   | 247,907       | 246,625      | 340,396                             | 219,000     | 121,396   | 223,846       | 224,695       |
| <b><u>Financial health outcomes:</u></b>      |                                    |             |           |               |              |                                     |             |           |               |               |
| Financial health index:                       | 269,814                            | 83,335      | 186,479   |               |              | 271,230                             | 83,781      | 187,449   |               |               |
| Credit score:                                 | 277,873                            | 91,394      | 186,479   |               |              | 278,633                             | 91,184      | 187,449   |               |               |
| No open revolving account:                    | 278,507                            | 92,028      | 186,479   |               |              | 279,211                             | 91,762      | 187,449   |               |               |
| Total balance: collections and delinquencies: | 270,016                            | 83,537      | 186,479   |               |              | 271,447                             | 83,998      | 187,449   |               |               |
| Any auto loan or lease:                       | 278,507                            | 92,028      | 186,479   |               |              | 279,211                             | 91,762      | 187,449   |               |               |
| <b><u>Robustness-check outcomes:</u></b>      |                                    |             |           |               |              |                                     |             |           |               |               |
| Not at eviction address or unobserved:        |                                    | 114,000     |           | 71,000*       | 77,500*      |                                     | 114,000     |           | 71,000*       | 77,500*       |
| Moved out of state:                           |                                    | 103,000     |           | 65,000*       | 70,500*      |                                     | 97,000      |           | 61,500*       | 66,500*       |
| Earnings out of 13 States:                    |                                    | 232,000     |           | 144,000*      | 161,000*     |                                     | 219,000     |           | 137,000*      | 153,000*      |
| <b><u>Payday outcomes:</u></b>                |                                    |             |           |               |              |                                     |             |           |               |               |
| Any payday inquiry (×100):                    |                                    | 75,608      |           | 44,994*       |              |                                     | 91,571      |           | 54,579*       |               |
| Number of payday inquiries:                   |                                    | 75,608      |           | 44,994*       |              |                                     | 91,571      |           | 54,579*       |               |
| Any payday loan (×100):                       |                                    | 99,570      |           | 59,259*       |              |                                     | 115,404     |           | 68,553*       |               |
| Number of payday loans:                       |                                    | 99,570      |           | 59,259*       |              |                                     | 115,404     |           | 68,553*       |               |

*Notes:* This table shows observation counts for all outcomes and samples used in the OLS, IV and RF specifications for 1-4 quarters (columns (1)-(5)) and 5-8 quarters (columns (6)-(10)) after eviction case filing. Observation counts for female and Black subgroups are counts across both Cook County and New York, unless marked with an asterisk, which indicates they are only for Cook County. Observation counts for Cook County are rounded in accordance with Census Bureau disclosure requirements for housing, labor market and robustness-check outcomes. Cook County results were approved for release by the U.S. Census Bureau, authorization number CBDRB-FY22-072.

**Table H.16: Observation Counts for RF, IV and OLS Regressions - Estimates  
3-6 Years (9-24 Quarters) after Filing**

|                                               | <b>9-16 Quarters (3-4 Years) After Filing</b> |             |           |               |              | <b>17-24 Quarters (5-6 Years) After Filing</b> |             |           |               |               |
|-----------------------------------------------|-----------------------------------------------|-------------|-----------|---------------|--------------|------------------------------------------------|-------------|-----------|---------------|---------------|
|                                               | All<br>(1)                                    | Cook<br>(2) | NY<br>(3) | Female<br>(4) | Black<br>(5) | All<br>(6)                                     | Cook<br>(7) | NY<br>(8) | Female<br>(9) | Black<br>(10) |
| <b>Housing outcomes:</b>                      |                                               |             |           |               |              |                                                |             |           |               |               |
| Not at eviction address:                      | 162,540                                       | 110,000     | 52,540    | 112,102       | 110,786      | 134,428                                        | 101,000     | 33,428    | 90,423        | 91,197        |
| Neighborhood poverty rate:                    | 129,327                                       | 86,500      | 42,827    | 82,906        | 81,913       | 105,182                                        | 80,500      | 24,682    | 68,162        | 69,440        |
| Emergency shelter:                            | 169,500                                       | 40,500      | 129,000   | 116,327       | 101,553      | 122,925                                        | 53,500      | 69,425    | 82,051        | 75,314        |
| Any homelessness services:                    | 169,500                                       | 40,500      | 129,000   | 116,327       | 101,553      | 122,925                                        | 53,500      | 69,425    | 82,051        | 75,314        |
| <b>Labor market outcomes:</b>                 |                                               |             |           |               |              |                                                |             |           |               |               |
| Earnings:                                     | 298,552                                       | 201,000     | 97,552    | 195,414       | 198,063      | 227,845                                        | 161,000     | 66,845    | 148,576       | 153,018       |
| Employment:                                   | 303,552                                       | 206,000     | 97,552    | 197,414       | 200,063      | 232,845                                        | 166,000     | 66,845    | 150,576       | 156,018       |
| <b>Financial distress outcomes:</b>           |                                               |             |           |               |              |                                                |             |           |               |               |
| Financial health index:                       | 306,223                                       | 134,984     | 171,239   |               |              | 197,230                                        | 113,385     | 83,845    |               |               |
| Credit score:                                 | 317,515                                       | 146,276     | 171,239   |               |              | 207,559                                        | 123,714     | 83,845    |               |               |
| No open revolving account:                    | 318,486                                       | 147,250     | 171,236   |               |              | 208,740                                        | 124,898     | 83,842    |               |               |
| Total balance: collections and delinquencies: | 306,658                                       | 135,419     | 171,239   |               |              | 197,759                                        | 113,914     | 83,845    |               |               |
| Any auto loan or lease:                       | 318,489                                       | 147,250     | 171,239   |               |              | 208,743                                        | 124,898     | 83,845    |               |               |

*Notes:* This table shows observation counts for all outcomes and samples used in the OLS, IV and RF specifications for 9-16 quarters (columns (1)-(5)) and 17-24 quarters (columns (6)-(10)) after eviction case filing. Observation counts for female and Black subgroups are counts across both Cook County and New York. Observation counts for Cook County are rounded in accordance with Census Bureau disclosure requirements. Cook County results were approved for release by the U.S. Census Bureau, authorization number CBDRB-FY22-072.

# I *Appendix: Additional Outcomes: Attrition and Out-of-State Moves*

This section studies the impact of eviction on several robustness-related outcomes not presented in the paper, including attrition and out-of-state moves. In Cook County, where we observe out-of-state moves and where we can construct a flag for earnings outside the states for which we can observe quarterly wage income, we study these outcomes directly. We also use these estimates to conduct a simple simulation to examine the sensitivity of our main earnings estimates to potential selection patterns. In New York, where our analysis uses non-Census data, we study the sensitivity of our analysis to the data source for measuring moves. We also conduct an analysis of attrition in New York.

## I.A *Cook County*

In Cook County, we first examine the sensitivity of our main estimate of the impact of eviction on moving addresses to how we define a move. Using the MAFARF data, we construct an alternative, more-inclusive definition of moving from the address associated with the eviction case. This alternative measure takes a value of 1 if either the person is observed at a new address or the person has a missing address. The impact of eviction on this outcome, shown in Table I.1, is 0.181, which is about twice as large as the impact on not being at the eviction address, which is 0.093 in Cook County, as shown in Table IV. This result suggests that eviction increases the likelihood of having a missing address, and suggests that the main analysis does not fully capture the extent an eviction order impacts the likelihood of moving addresses.<sup>19</sup>

We turn next to out-of-state moves. If judge stringency impacts the likelihood of moving out of state, our IV estimates may be biased. We investigate this possibility empirically using the Cook County sample, which allows us to study whether eviction has an impact on out-of-state moves. To the extent that eviction impacts tenants' likelihood of moving out of state similarly across locations, these estimates will also inform the sign and potential magnitude of a potential bias in New York. The middle panel of Table I.1 shows the impact of eviction on moving out of state using the Cook County sample. We find that eviction decreases the likelihood of moving out of state by 3.9 percentage points, and the estimate is statistically significant at the 10 percent level. This result may seem surprising, since eviction increases the likelihood of moving overall. Nevertheless, this result is consistent with eviction making it more difficult for tenants to relocate at a far distance. Eviction may, for example, increase a tenant's dependence on family for housing. This effect diminishes to a statistically insignificant 0.7 percentage points in the 5-8 quarters after filing.

---

<sup>19</sup>While address data in New York has national coverage using data from Infutor, it is not possible to perform the analogous exercise because Infutor data does not distinguish between the person not moving and the address not being updated. Hence, conditional on matching to any Infutor record, missing addresses are not observed.

Recall that in Cook County we only observe earnings in Illinois and the 12 LEHD Option “A” states. To understand the extent of attrition out of these 13 states, we construct an indicator for having any positive income across the 50 states (using the LEHD U.S. Indicators File) and zero earnings within the 13 states that we observe, and report the impact of eviction on this variable in the bottom panel of Table I.1. The results show that eviction decreases the likelihood of having any earnings outside the LEHD states by 4.1 percentage points in the 1-4 quarters after case filing, which is significant at the 5 percent level. This result is consistent with our analysis of out-of-state moves. The magnitude diminishes to 1.9 percentage points in the 5-8 quarters, and is statistically insignificant. Moving out of state is unlikely to be driving our earnings estimates, for two reasons. First, non-evicted tenants are more likely to move out of state and hence be recorded as having zero earnings. This pattern would tend to attenuate our estimates if these non-evicted movers have higher earnings than non-evicted stayers. Second, the negative impact of eviction on earnings is larger in quarters 5-8 compared to quarters 1-4, as seen in Table VI, while the the out-of-state earnings estimates have the opposite pattern. This comparison suggests that, if anything, selection is likely attenuating our earnings estimates in the short run.

We conduct an additional simulation exercise to examine the extent that selection into moving out of state may impact our earnings results. The exercise shows that even implausibly large selection patterns would have a relatively muted impact on our main earnings estimates. This exercise is based on Bharadwaj, Løken, and Neilson (2013) and is conducted entirely outside the Census RDC using simulated data. The idea of this exercise is to use the estimates from our empirical analysis (which includes only LEHD states, “non-movers”) and to impute stronger and stronger selection patterns for the non-LEHD states (“movers”), and then to re-estimate an OLS regression of earnings on eviction using the simulated sample that includes both movers and non-movers.

We use Cook County estimates from Tables I and VI, since we observe out-of-state moves in Cook County. We generate a simulated sample of 301,000 with 193,000 evicted (following Table I). We simulate earnings to have a mean of approximately \$4821 and a standard deviation of \$5810 (following Table VI, column 1) and assume the negative impact of eviction is \$445 (following Table VI, column 3). For simplicity, we assume that none of the evicted group move, and 3.9 percent of the non-evicted group move (from Table I.1). While it is not obvious that out-of-state movers would be negatively selected—and, in fact, it seems more plausible that they would be positively selected—we assume negative selection here because this type of selection would attenuate our earnings estimates, while positive selection would imply our estimates underestimate the true earnings impact of eviction. Table I.2 shows the estimation of an OLS regression with the simulated data, under different assumptions about the extent of selection. Column (1) assumes no selection into moving, and delivers an estimate of \$-432. Column (2) assumes non-evicted movers have \$100 less quarterly earnings (relative to non-evicted stayers), while columns (3), (4), and (5) assume they have \$200, \$500, and \$1000 less quarterly earnings, respectively. Note that the earnings estimate is attenuated in each successive column, which is by construction of the simulated data. Even in column (5),

which has the strongest selection pattern—with non-evicted movers having \$1000 (or roughly 20 percent) lower earnings than non-evicted stayers—the estimate is attenuated by only about \$70 relative to the baseline. Our conclusion is that selective migration is unlikely to be driving our earnings estimates, and this conclusion is intuitive, given that overall migration rates are low.

## *I.B New York*

While the sources of residential address data for NYC do not allow us to distinguish “un-observed” addresses from not-moving (as in the Cook County sample), we can evaluate the sensitivity of the New York residential mobility results to the sources of moves data. Table I.3 reports our IV estimates of the effects of eviction orders on an indicator for not being at the eviction address in the second year after filing under different constructions of “not at eviction address” based on different data sources.<sup>20</sup> Column (1) repeats the estimate from Table IV which uses our baseline definition: having a new address in either benefits or Infutor data. Columns (2) and (3) evaluate how sensitive the move results are when defining moves from the filing address as: (2) a new address in the benefits data (but not Infutor), and (3) a new address in Infutor but not the benefits data. Column (4) examines moves for individuals using only the benefits data. Column (5) reports the estimate for individuals using only the Infutor data. Tenants in housing court are much more likely to appear in the benefits data than in the Infutor alone during the study period. This is unsurprising given that our New York sample is restricted to tenants who have some history of benefits receipt. Thus, the estimates using only Infutor data rely on a much smaller sample and are less precise. Still, both sources point to increases in residential mobility from eviction in the short run.

Next, we attempt to quantify attrition—to the extent possible—in the NYC sample. A challenge in the NYC data sources is that we cannot readily distinguish non-employment (for labor market outcomes), no hospitalizations (for health outcomes), or no benefits records (for residential mobility outcomes) from a move out of New York state. Nevertheless, it is useful to examine whether stringency is related to appearing in the NYC outcomes data. Permanent attrition out of a covered jurisdiction should result in a pattern of all zeros for appearances in an administrative outcome measure (Grogger 2012). As in Chyn (2018), we examine whether our treatment is followed by a run of all zeros in our outcome data. In Table I.4, we regress an indicator for any appearance in the different NY-state specific data sources on our instrument (with and without controls) during the post-filing period. It is important to note that this exercise could confound treatment effects with attrition. That said, the results suggest that judge stringency is not strongly related to appearance (or non-appearance) in any of the NY-specific outcome data sources in the post-filing period.

Stringency is uncorrelated with having all zeros for earnings in: the entire post-period (“Any Post Earnings”), all quarters at least 4 quarters after filing (“Any Post Earnings Q4+”),

---

<sup>20</sup>We focus on residential mobility results in the second year because this is when effects appear to materialize in NYC.

and all quarters at least eight quarters after filing (“Any Post Earnings Q8+”). Stringency is also uncorrelated with having having any benefits data after filing which would allow to observe a new address (“Any Post Benefit”). Finally, stringency is uncorrelated with having any appearance in the state-wide hospitalization data (“Any Post Hospital”), and uncorrelated with appearing in any linked data set after filing (“Any Post Record”).

**Table I.1: Additional Cook County Outcomes: 1-4 and 5-8 Quarters After Filing**

|                                               | 1-4 Quarters After Filing  |                     |                                  | 5-8 Quarters After Filing  |                     |                                |
|-----------------------------------------------|----------------------------|---------------------|----------------------------------|----------------------------|---------------------|--------------------------------|
|                                               | $\mathbb{E}[Y E=0]$<br>(1) | OLS<br>(2)          | IV<br>(3)                        | $\mathbb{E}[Y E=0]$<br>(4) | OLS<br>(5)          | IV<br>(6)                      |
| <b>Not at eviction address or unobserved:</b> | 0.445<br>(0.497)           | 0.051***<br>(0.003) | 0.181***<br>(0.060)<br>[114,000] | 0.687<br>(0.464)           | 0.108***<br>(0.004) | 0.090<br>(0.056)<br>[114,000]  |
| <i>Cook County, By Group</i>                  |                            |                     |                                  |                            |                     |                                |
| Female                                        | 0.440<br>(0.496)           | 0.057***<br>(0.004) | 0.143**<br>(0.070)               | 0.683<br>(0.465)           | 0.118***<br>(0.005) | 0.096<br>(0.063)               |
| Black                                         | 0.429<br>(0.495)           | 0.055***<br>(0.004) | 0.184**<br>(0.073)               | 0.674<br>(0.469)           | 0.114***<br>(0.005) | 0.051<br>(0.068)               |
| <b>Moved out of state:</b>                    | 0.022<br>(0.147)           | 0.002*<br>(0.001)   | -0.039*<br>(0.022)<br>[103,000]  | 0.048<br>(0.213)           | 0.008***<br>(0.002) | 0.007<br>(0.035)<br>[97,000]   |
| <i>Cook County, By Group</i>                  |                            |                     |                                  |                            |                     |                                |
| Female                                        | 0.019<br>(0.137)           | 0.002<br>(0.001)    | -0.032<br>(0.025)                | 0.042<br>(0.201)           | 0.009***<br>(0.002) | 0.021<br>(0.040)               |
| Black                                         | 0.014<br>(0.119)           | 0.003***<br>(0.001) | -0.018<br>(0.023)                | 0.036<br>(0.187)           | 0.011***<br>(0.002) | -0.007<br>(0.035)              |
| <b>Earnings out of 13 states:</b>             | 0.036<br>(0.186)           | 0.003***<br>(0.001) | -0.041**<br>(0.017)<br>[232,000] | 0.051<br>(0.219)           | 0.003***<br>(0.001) | -0.019<br>(0.020)<br>[219,000] |
| <i>Cook County, By Group</i>                  |                            |                     |                                  |                            |                     |                                |
| Female                                        | 0.029<br>(0.169)           | 0.004***<br>(0.001) | -0.027<br>(0.017)                | 0.043<br>(0.202)           | 0.003***<br>(0.001) | 0.014<br>(0.021)               |
| Black                                         | 0.027<br>(0.161)           | 0.004***<br>(0.001) | -0.032*<br>(0.019)               | 0.038<br>(0.191)           | 0.004***<br>(0.001) | -0.017<br>(0.022)              |

*Notes:* \*  $p < 0.1$ , \*\*  $p < 0.05$ , \*\*\*  $p < 0.01$ . This table shows IV and OLS results one year and two years after filing for three additional outcomes. “Not at eviction address or unobserved” is an indicator which is one if an individual is not observed in the MAFARF address data or is observed at an address other than the address associated with the eviction case. “Moved out of state” is an indicator for observing an individual at an address outside of the state of Illinois. “Earnings out of 13 states” is an indicator for if the individual had wage income reported outside of the 13 states in which we have LEHD quarterly earnings data. Observations for the main combined specifications are reported below the standard errors in columns (3) and (6). Observation counts for all outcomes and subgroups are in Appendix Table H.15. Results were approved for release by the U.S. Census Bureau, authorization number CBDRB-FY22-072.

**Table I.2: Simulation: Examining the Sensitivity of Earnings Estimates to Selection**

|                            | Baseline              | \$100                 | \$200                 | \$500                 | \$1000                |
|----------------------------|-----------------------|-----------------------|-----------------------|-----------------------|-----------------------|
|                            | (1)                   | (2)                   | (3)                   | (4)                   | (5)                   |
| Quarterly earnings         | -431.86***<br>(22.09) | -428.03***<br>(22.09) | -420.38***<br>(22.09) | -401.24***<br>(22.09) | -362.98***<br>(22.12) |
| Number of observations     | 301,000               | 301,000               | 301,000               | 301,000               | 301,000               |
| $R^2$                      | 0.001                 | 0.001                 | 0.001                 | 0.001                 | 0.001                 |
| Mean of dependent variable | 4668                  | 4666                  | 4661                  | 4649                  | 4624                  |
| S.d. of dependent variable | 5810                  | 5810                  | 5810                  | 5811                  | 5816                  |

*Notes:* \*  $p < 0.1$ , \*\*  $p < 0.05$ , \*\*\*  $p < 0.01$ . This table presents a simple simulation to examine the sensitivity of the earnings estimates to out-of-state moves. The simulated data is based on 301,000 observations with 193,000 evicted and an approximate mean and standard deviation of earnings of \$4821 and \$5810, respectively, and a negative impact of eviction of approximately \$445. The simulation assumes zero migration for evicted tenants and a 3.9 percent migration rate for non-evicted tenants. In the baseline (column 1) there is no selective migration. Columns 2-5 assume increasingly severe negative selection for non-evicted movers. In column 2, the non-evicted movers are simulated to have \$100 lower earnings than non-evicted stayers, while in columns 3, 4, and 5 the extent of selection is simulated to be \$200, \$500, and \$1,000, respectively. The estimate reported is a simple OLS regression of quarterly earnings on eviction, and includes both movers and non-movers to examine the sensitivity of the estimate to increasingly strong selection patterns.

**Table I.3: New York Residential Mobility Results by Alternative Move Definitions (Q5-Q8)**

|              | Move in Either<br>(1) | Move in Benefits<br>(2) | Move in Infutor<br>(3) | Using Only Benefits Data<br>(4) | Using Only Infutor Data<br>(5) |
|--------------|-----------------------|-------------------------|------------------------|---------------------------------|--------------------------------|
| Evicted      | 0.149 *<br>(0.084)    | 0.187 **<br>(0.093)     | 0.152 *<br>(0.085)     | 0.196 **<br>(0.096)             | 0.143<br>(0.279)               |
| Observations | 69227                 | 69227                   | 69227                  | 54844                           | 14350                          |

*Notes:* \*  $p < 0.1$ , \*\*  $p < 0.05$ , \*\*\*  $p < 0.01$ . This table reports the IV estimates on “Not at eviction address” in the second year after filing by different definitions of address changes. “Move in Either” is our base definition used in Table IV and takes the value 1 if the individual is observed at a new address other than their filing address in either data from Infutor or the benefits data, and 0 otherwise. “Move in Benefits” takes the value 1 if the individual is observed at a new address in the benefits data but not Infutor (for individuals who appear in both), and 0 otherwise. “Move in Infutor” takes the value 1 if the individual is observed at a new address in Infutor but not the benefits data (for individuals who appear in both), and 0 otherwise. “Using Only Benefits Data” is estimated using the subset of individuals who we observe in the post period in the benefits data, and take the value 1 if the individual appears at an address that is not the filing address, 0 otherwise. “Using Only Infutor Data” is estimated using the subset of individuals who we observe in the post period in the Infutor data, and take the value 1 if the individual appears at an address that is not the filing address.

Table I.4: Attrition—New York

|                  | Any Post Earnings  |                     | Any Post Earnings Q4+ |                    | Any Post Earnings Q8+ |                     | Any Post Benefits  |                    | Any Post Hospitalization |                     | Any Post Record    |                    |
|------------------|--------------------|---------------------|-----------------------|--------------------|-----------------------|---------------------|--------------------|--------------------|--------------------------|---------------------|--------------------|--------------------|
|                  | (1)                | (2)                 | (3)                   | (4)                | (5)                   | (6)                 | (7)                | (8)                | (9)                      | (10)                | (11)               | (12)               |
| Judge stringency | 0.0182<br>(0.0383) | -0.0065<br>(0.0328) | 0.0337<br>(0.0440)    | 0.0029<br>(0.0388) | -0.0187<br>(0.0638)   | -0.0233<br>(0.0501) | 0.0072<br>(0.0351) | 0.0115<br>(0.0298) | -0.0331<br>(0.0374)      | -0.0141<br>(0.0357) | 0.0183<br>(0.0239) | 0.0168<br>(0.0230) |
| Controls         | No                 | Yes                 | No                    | Yes                | No                    | Yes                 | No                 | Yes                | No                       | Yes                 | No                 | Yes                |
| Observations     | 144,429            | 144,400             | 121,413               | 121,396            | 102,770               | 102,755             | 150,698            | 150,662            | 150,698                  | 150,662             | 150,698            | 150,662            |

*Notes:* \*  $p < 0.1$ , \*\*  $p < 0.05$ , \*\*\*  $p < 0.01$ . In Columns (1) and (2), we regress an indicator for having all zeros for labor records in quarters 1–39 post-filing on our instrument. In Columns (3) and (4), we regress an indicator for having all zeros for earnings record from the 8–39 quarters after filing on our instrument. In Columns (5) and (6), we regress an indicator for having any benefits record after filing on our instrument. In Columns (7) and (8), we regress an indicator for any hospital visit after filing on our instrument. In Columns (9) and (10), we regress an indicator for having any earnings, hospital visit, or benefits record post-filing on our instrument. All specifications include court-by-time of filing fixed effects. The specifications in columns (2), (4), (6), (8), (10) and (12) include the controls listed in Table IV. Standard errors, in parentheses, are two-way clustered at the courtroom-year and individual level except in Column (1), where they are clustered at the courtroom-by-year level only.



## J APPENDIX: SYMMETRIC DIFFERENCE-IN-DIFFERENCES

This section briefly sets up notation and then discusses what difference-in-differences (DiD) recovers under different settings. We then briefly develop the symmetric DiD estimator from Heckman and Robb (1985). The final subsection reports symmetric DiD estimates.

### J.A Setup

Consider a panel data setting where we observe the outcome of interest  $Y \in \mathbb{R}$  and treatment state  $E \in \{0, 1\}$  across individuals and time. For simplicity, we will consider wage income as the outcome. Assume that each individual can only be treated once, in time period 0, so we can denote observations by  $E_{i,t}$  and  $Y_{i,t}$ , where the  $t$  subscript refers to time relative to treatment. The observed outcomes are generated by potential outcomes  $\xi_{i,t}(e)$ ,  $e \in \{0, 1\}$  (i.e.,  $Y_{i,t} = E_{i,t}\xi_{i,t}(1) + (1 - E_{i,t})\xi_{i,t}(0)$ ).

Suppose we observe an instrument  $Z$  which takes values in  $z \in \mathcal{Z}$ , and assume classic IV and monotonicity assumptions hold. By Vytlacil (2002), this setup is equivalent to the existence of a latent index selection model of the form

$$E_{i,t}(z) = \begin{cases} 0 & \text{when } t < 0, \\ \mathbf{1}\{-\varepsilon_i < v(z)\} & \text{otherwise,} \end{cases}$$

where  $v(z)$  is a function and  $Z$  is independent of potential outcomes and  $\varepsilon$ .

Throughout this section we ignore time-invariant observed covariates that we may want to condition the analysis on. We also assume that

$$v(Z) = \gamma Z.$$

Note that this setup is equivalent to a classical selection model that imposes a linear index assumption.<sup>21</sup> We further assume that the observed outcome can be written as the linear equation:

$$Y_{i,t} = \beta_{i,t}E_{i,t} + \nu_{i,t},$$

where  $\beta_{i,t} \equiv \xi_{i,t}(1) - \xi_{i,t}(0)$  and  $\nu_{i,t} \equiv \xi_{i,t}(0)$ . In addition, we write  $\beta_{i,t}$  as

$$\beta_{i,t} = \beta_t + \Psi_{i,t},$$

where  $\Psi_{i,t}$  captures the idiosyncratic portion of the effect of an eviction and  $\beta_t$  captures the average effect.

---

<sup>21</sup>In other words, this model is equivalent to assuming treatment is taken if  $\gamma Z + \varepsilon_i > 0$ , where  $\varepsilon_i$  is iid and independent of  $Z$ , which is equivalent to what we have here with some re-arranging.

In the next subsection, we discuss potential assumptions on  $\nu_{i,t}$  and the implications for what DiD would then estimate.

## J.B Analysis

The probability limit of the DiD estimator that uses period  $k$  as the post-treatment period and period  $\ell$  as the pre-treatment period consists of the following four components:

$$\mathbb{E}[Y_{i,k}|E_{i,0} = 1] = \beta_k + \mathbb{E}[\Psi_{i,k}|E_{i,0} = 1] + \mathbb{E}[\nu_{i,k}|\varepsilon_i > -\gamma Z_i] \quad (\text{J.1})$$

$$\mathbb{E}[Y_{i,-\ell}|E_{i,0} = 1] = \mathbb{E}[\nu_{i,-\ell}|\varepsilon_i > -\gamma Z_i] \quad (\text{J.2})$$

$$\mathbb{E}[Y_{i,k}|E_{i,0} = 0] = \mathbb{E}[\nu_{i,k}|\varepsilon_i \leq -\gamma Z_i] \quad (\text{J.3})$$

$$\mathbb{E}[Y_{i,-\ell}|E_{i,0} = 0] = \mathbb{E}[\nu_{i,-\ell}|\varepsilon_i \leq -\gamma Z_i]. \quad (\text{J.4})$$

And the probability limit is

$$\beta_k + \mathbb{E}[\Psi_{i,k}|E_{i,0} = 1] + (\mathbb{E}[\nu_{i,k} - \nu_{i,-\ell}|E_{i,0} = 1]) - (\mathbb{E}[\nu_{i,k} - \nu_{i,-\ell}|E_{i,0} = 0]),$$

which can be written as

$$\beta_k + \mathbb{E}[\Psi_{i,k}|E_{i,0} = 1] + \underbrace{(\mathbb{E}[\nu_{i,k}|E_{i,1} = 1] - \mathbb{E}[\nu_{i,k}|E_{i,1} = 0])}_A - \underbrace{(\mathbb{E}[\nu_{i,-\ell}|E_{i,1} = 1] - \mathbb{E}[\nu_{i,-\ell}|E_{i,1} = 0])}_B.$$

If we assume that positive income shocks are associated with lower probabilities of eviction, then we would expect both  $A$  and  $B$  to be weakly negative, and the relative magnitudes of these two terms will determine the sign of the bias. This also highlights why the choice of pre-period will affect DiD estimates when there are differential pre-trends.

Assuming that the conditional expectation  $\mathbb{E}[\nu_{i,t}|\varepsilon_i]$  is linear in  $\varepsilon$ , we can rewrite this equation as

$$\begin{aligned} & \beta_k + \mathbb{E}[\Psi_{i,k}|E_{i,0} = 1] \\ & + (b(\nu_{i,k}, \varepsilon_i) - b(\nu_{i,-\ell}, \varepsilon_i)) (\mathbb{E}[\varepsilon_i|\varepsilon_i > -\gamma Z_i] - \mathbb{E}[\varepsilon_i|\varepsilon_i \leq -\gamma Z_i]), \end{aligned} \quad (\text{J.5})$$

where  $b(\nu_{i,k}, \varepsilon_i)$  is the population regression coefficient from  $\nu_{i,k} = a + b\varepsilon_i + e_i$  (Heckman and Robb 1985; Ashenfelter and Card 1985).<sup>22</sup>

Note that  $(\mathbb{E}[\varepsilon_i|\varepsilon_i > -\gamma Z_i] - \mathbb{E}[\varepsilon_i|\varepsilon_i \leq -\gamma Z_i]) > 0$ , so the sign of the bias term will depend on  $b(\nu_{i,k}, \varepsilon_i) - b(\nu_{i,-\ell}, \varepsilon_i)$ , which in turn depends on the sign of  $(cov(\nu_{i,k}, \varepsilon_i) - cov(\nu_{i,-\ell}, \varepsilon_i))$ . The correlation between  $\varepsilon_i$  and a given earnings shock  $\nu_{i,t}$  will depend on how eviction outcomes are determined and the information set of the judge. Here we assume that the

<sup>22</sup>This step uses the additional assumption that  $\mathbb{E}[\nu_{i,k}|\varepsilon_i > -\gamma Z_i]$  is linear in  $\varepsilon_i$ , allowing us to rewrite this expression as  $\frac{cov(\nu_{i,k}, \varepsilon_i)}{var(\varepsilon_i)} \mathbb{E}[\varepsilon_i|\varepsilon_i > -\gamma Z_i]$ . The assumption of linearity of the conditional expectation is a restriction. As discussed in Chabé-Ferret (2015), this assumption is satisfied for joint normality, as well as for many other elliptical distributions.

contemporaneous earnings innovation  $\nu_{i,0}$  affects the eviction decision and that there is full information about any shocks up through period  $t = 0$ , when the eviction decision is made.

Heckman and Robb (1985) and Ashenfelter and Card (1985) show that, when the earnings process is covariance stationary, then DiD estimates which are taken symmetrically around treatment will be unbiased, even when parallel trends does not hold. One simple example of this would be if earnings follow an AR(1) process. In such a case, evicted individuals may have larger negative shocks in the run-up to the eviction case, which would result in non-parallel trends in absence of treatment, yet symmetric DiD will still provide an unbiased estimate. The AR(1) case is worked out below as a simple example. See Chabé-Ferret (2015) for a more recent and rigorous consideration of symmetric DiD.

### AR(1) earnings process

Using the model above, assume that the earnings process consists of a fixed effect  $\theta_i$  and an AR(1) error term  $\eta_{i,t}$ . Similarly, assume that the shock to the eviction outcome depends on the individual fixed effect and the innovation to earnings at time  $t = 0$ :

$$\begin{aligned}\nu_{i,t} &= \theta_i + \eta_{i,t} \\ \eta_{i,t} &= \rho\eta_{i,t-1} + \eta_{i,t}^* \\ \varepsilon_i &= \alpha_1\theta_i + \alpha_2\eta_{i,0} + \varepsilon_i^*,\end{aligned}$$

where  $\eta_{i,t}^*$  and  $\varepsilon_i^*$  are idiosyncratic shocks. We will assume that larger fixed effects in the earnings regression reduce the probability of eviction ( $\alpha_1 < 0$ ), and that positive earnings innovations lower the probability of eviction ( $\alpha_2 < 0$ ). Under this setting,

$$\begin{aligned}\text{cov}(\nu_{i,k}, \varepsilon_i) &= \text{cov}(\theta_i + \eta_{i,k}, \alpha_1\theta_i + \alpha_2\eta_{i,0} + \varepsilon_i^*) \\ &= \alpha_1^2\text{var}(\theta_i) + \alpha_2\text{cov}(\eta_{i,k}, \eta_{i,0}) \\ &= \alpha_1^2\text{var}(\theta_i) + \alpha_2\rho^k\text{var}(\eta_{i,0}).\end{aligned}$$

Similarly, we have

$$\text{cov}(\nu_{i,-\ell}, \varepsilon_i) = \alpha_1^2\text{var}(\theta_i) + \alpha_2\rho^\ell\text{var}(\eta_{i,-\ell}).$$

Under stationarity in the earnings process,  $\text{var}(\eta_{i,0}) = \text{var}(\eta_{i,-\ell})$ , so if  $k = \ell$ , the bias term  $(b(\nu_{i,k}, \varepsilon_i) - b(\nu_{i,-\ell}, \varepsilon_i))$  in equation J.5 will be equal to 0, which is the symmetric DiD result.

## J.C Difference-in-Differences Estimates

In panel settings, DiD is commonly used to estimate the ATT using a panel regression of the form:

$$Y_{i,t} = \lambda_i + \mu_\tau + \alpha_t + \sum_{k \neq -\ell} \gamma_k^{-\ell} E_i \times \mathbf{1}\{k = t\} + \nu_{i,t}, \quad (\text{J.6})$$

where  $\lambda_i$  is a unit fixed effect,  $\mu_\tau$  are calendar-time (year-quarter) dummies,  $\alpha_t$  are dummies for time (quarter) relative to the treatment period, and  $-\ell$  is the reference period, which we refer to as the pre-period. The parameter of interest in these analyses is the ATT  $k$  periods after treatment:  $\Delta_k^{ATT} := \mathbb{E}[Y_{i,k}(1) - Y_{i,k}(0) | E_i = 1]$ .

For equation J.6 to recover the ATT, a common assumption is that trends would be parallel between treatment and control in the absence of treatment. In our setting, this assumption is unlikely to hold given the patterns of differential pre-trends in outcomes shown in Section IV.C and Figure E.2, panel A.<sup>23</sup>

The regression equation for the symmetric DiD is:

$$Y_{i,t} = \gamma_t + \alpha_i + \alpha \times E_{i,t} + \sum_{r=S; r \notin -R}^{-1} \beta_r + \sum_{r=S; r \notin -R}^{-1} \delta_r \times E_{i,t} + \sum_{r=0; r \notin R}^F \beta_r + \sum_{r=0; r \notin R}^F \delta_r \times E_{i,t} \quad (\text{J.7})$$

$$+ \beta_R \times I\{r \in R\} + \delta_R \times E_{i,t} \times I\{r \in R\} + \epsilon_{i,t}$$

where  $R$  is the outcome window (e.g., for quarters 1-8,  $R = [1, 8]$ , and  $-R = [-8, -1]$ ). We omit  $-R$  for symmetry with the outcome window, and we report the estimate for  $\delta_R$ , which is the symmetric DiD estimate. The regression includes individual fixed effects,  $\alpha_i$ , and  $\gamma_t$ , which are calendar quarter fixed effects, and the standard errors are clustered at the individual level.

Tables J.1 and J.2 compare DiD and IV estimates for housing and labor market outcomes respectively. For the “Not at eviction address” outcome, DiD estimates are smaller than the IV estimates, with the combined estimate in year 1 of 0.045, compared to the IV estimate of 0.082. The combined estimates for emergency shelter and any homelessness services are similar for DiD and IV. For earnings and employment, the DiD estimates are consistently smaller in magnitude than the IV estimates. For example, the combined impact on earnings is -131 from symmetric DiD, but -323 for IV.

Table J.3 compares DiD estimates to IV estimates for credit bureau outcomes, while Table J.4 compares DiD estimates to IV estimates for hospitalization outcomes. For credit bureau and hospital utilization outcomes, the DiD estimates are consistently smaller than the IV estimates.

Overall, the results suggest that the ATT may be smaller in magnitude than the estimates

---

<sup>23</sup>See Appendix J, which further discusses the potential bias from violation of the parallel trends assumption.

for compliers identified for by the instrumental variables strategy for many outcomes. This comparison requires relatively strong assumptions to interpret the symmetric DiD estimates as unbiased estimates of the ATT.

**Table J.1: Comparison of IV and DiD estimates - Housing Outcomes**

|                                   | 1 Year After Filing |                    |                     | 2 Years After Filing |                    |                     |
|-----------------------------------|---------------------|--------------------|---------------------|----------------------|--------------------|---------------------|
|                                   | $\mathbb{E}[Y E=0]$ | IV                 | DiD                 | $\mathbb{E}[Y E=0]$  | IV                 | DiD                 |
|                                   | (1)                 | (2)                | (3)                 | (4)                  | (5)                | (6)                 |
| <b>Not at eviction address:</b>   | 0.293<br>(0.318)    | 0.082**<br>(0.036) | 0.047***<br>(0.003) | 0.478<br>(0.348)     | 0.111**<br>(0.053) | 0.104***<br>(0.003) |
|                                   |                     | [218,228]          | [2,110,008]         |                      | [183,227]          | [2,110,008]         |
| <i>By Location</i>                |                     |                    |                     |                      |                    |                     |
| Cook County                       | 0.363<br>(0.481)    | 0.093<br>(0.057)   | 0.004<br>(0.004)    | 0.568<br>(0.495)     | 0.074<br>(0.064)   | 0.063***<br>(0.004) |
| New York                          | 0.222<br>(0.415)    | 0.071<br>(0.045)   | 0.090***<br>(0.004) | 0.389<br>(0.487)     | 0.149*<br>(0.084)  | 0.145***<br>(0.005) |
| <i>By Group</i>                   |                     |                    |                     |                      |                    |                     |
| Female                            | 0.280<br>(0.312)    | 0.093**<br>(0.046) | 0.052***<br>(0.003) | 0.461<br>(0.343)     | 0.136**<br>(0.060) | 0.109***<br>(0.004) |
| Black                             | 0.272<br>(0.310)    | 0.066<br>(0.056)   | 0.041***<br>(0.004) | 0.454<br>(0.345)     | 0.098<br>(0.080)   | 0.103***<br>(0.004) |
| <b>Emergency shelter:</b>         | 0.009<br>(0.068)    | 0.034**<br>(0.017) | 0.037***<br>(0.002) |                      |                    |                     |
|                                   |                     | [210,840]          | [1,766,585]         |                      |                    |                     |
| <i>By Location</i>                |                     |                    |                     |                      |                    |                     |
| Cook County                       | 0.007<br>(0.086)    | 0.023<br>(0.028)   | 0.006***<br>(0.002) |                      |                    |                     |
| New York                          | 0.011<br>(0.105)    | 0.046**<br>(0.019) | 0.068***<br>(0.003) |                      |                    |                     |
| <i>By Group</i>                   |                     |                    |                     |                      |                    |                     |
| Female                            | 0.009<br>(0.066)    | 0.024<br>(0.018)   | 0.040***<br>(0.002) |                      |                    |                     |
| Black                             | 0.010<br>(0.072)    | 0.036<br>(0.024)   |                     |                      |                    |                     |
| <b>Any homelessness services:</b> | 0.015<br>(0.086)    | 0.029<br>(0.023)   | 0.039***<br>(0.002) |                      |                    |                     |
|                                   |                     | [210,840]          | [1,766,585]         |                      |                    |                     |
| <i>By Location</i>                |                     |                    |                     |                      |                    |                     |
| Cook County                       | 0.017<br>(0.128)    | 0.012<br>(0.042)   | 0.005*<br>(0.003)   |                      |                    |                     |
| New York                          | 0.013<br>(0.114)    | 0.046**<br>(0.018) | 0.073***<br>(0.003) |                      |                    |                     |
| <i>By Group</i>                   |                     |                    |                     |                      |                    |                     |
| Female                            | 0.015<br>(0.086)    | 0.030<br>(0.023)   | 0.042***<br>(0.002) |                      |                    |                     |
| Black                             | 0.017<br>(0.092)    | 0.049*<br>(0.029)  | 0.044***<br>(0.002) |                      |                    |                     |

*Notes:* \*  $p < 0.1$ , \*\*  $p < 0.05$ , \*\*\*  $p < 0.01$ . This table reports equally-weighted averages of Cook County and New York non-evicted sample means ( $\mathbb{E}[Y|E=0]$ ), as well as equally-weighted averages of location-specific two-stage least squares (IV) and DiD estimates of the impact of eviction on the tenant’s housing situation. Outcomes are listed on the left of each row. Results are shown for 1-4 quarters (columns (1)-(3)) and for 5-8 quarters (columns (4)-(6)) after eviction case is filed. DiD estimates for the bottom two panels in column (6) and the Black subsample in “emergency shelter” panel are suppressed due to small cell size. Each panel shows results for a given outcome. Below the combined estimates in each panel, we report estimates separately for each location and for the female and Black subsamples. The IV estimates are identical to those in Tables IV and V. The DiD regressions include individual fixed effects and time relative to filing dummies and is described in equation J.7. Standard errors are clustered at judge-year level and are shown in parentheses. The number of person-years appearing in the full sample of the DiD specifications are listed in brackets under standard errors in columns (3) and (6). Table H.15 reports observation counts for all IV regressions, and Table J.5 reports observation counts for all DiD regressions. Cook County results were approved for release by the U.S. Census Bureau, authorization number CBDRB-FY22-072.

Table J.2: Comparison of IV and DiD estimates - Labor Outcomes

|                    | 1-4 Quarters After Filing |                    |                      | 5-8 Quarters After Filing |                     |                      |
|--------------------|---------------------------|--------------------|----------------------|---------------------------|---------------------|----------------------|
|                    | $\mathbb{E}[Y E=0]$       | IV                 | DiD                  | $\mathbb{E}[Y E=0]$       | IV                  | DiD                  |
|                    | (1)                       | (2)                | (3)                  | (4)                       | (5)                 | (6)                  |
| <b>Earnings:</b>   | 4,300<br>(3,809)          | -323*<br>(175)     | -175***<br>(9)       | 4,254<br>(3,885)          | -613**<br>(248)     | -241***<br>(11)      |
|                    |                           | [374,400]          | [15,127,852]         |                           | [336,396]           | [15,127,852]         |
| <i>By Location</i> |                           |                    |                      |                           |                     |                      |
| Cook County        | 4,821<br>(5,810)          | -445*<br>(249)     | -157***<br>(14)      | 4,821<br>(5,956)          | -627*<br>(337)      | -227***<br>(19)      |
| New York           | 3,779<br>(4,926)          | -201<br>(245)      | -194***<br>(11)      | 3,687<br>(4,991)          | -599*<br>(363)      | -255***<br>(12)      |
| <i>By Group</i>    |                           |                    |                      |                           |                     |                      |
| Female             | 4,136<br>(3,545)          | -504***<br>(185)   | -149***<br>(10)      | 4,094<br>(3,610)          | -767***<br>(295)    | -196***<br>(12)      |
| Black              | 4,319<br>(3,664)          | -377<br>(234)      | -163***<br>(10)      | 4,252<br>(3,718)          | -931***<br>(307)    | -221***<br>(13)      |
| <b>Employment:</b> | 0.565<br>(0.317)          | -0.015<br>(0.021)  | -0.015***<br>(0.001) | 0.549<br>(0.322)          | -0.018<br>(0.027)   | -0.019***<br>(0.001) |
|                    |                           | [376,400]          | [15,457,852]         |                           | [340,396]           | [15,457,852]         |
| <i>By Location</i> |                           |                    |                      |                           |                     |                      |
| Cook County        | 0.623<br>(0.432)          | 0.003<br>(0.027)   | -0.014***<br>(0.001) | 0.613<br>(0.438)          | -0.010<br>(0.030)   | -0.015***<br>(0.002) |
| New York           | 0.507<br>(0.465)          | -0.032<br>(0.032)  | -0.016***<br>(0.001) | 0.485<br>(0.471)          | -0.027<br>(0.046)   | -0.023***<br>(0.001) |
| <i>By Group</i>    |                           |                    |                      |                           |                     |                      |
| Female             | 0.585<br>(0.315)          | -0.036<br>(0.025)  | -0.014***<br>(0.001) | 0.568<br>(0.320)          | -0.003<br>(0.034)   | -0.015***<br>(0.001) |
| Black              | 0.583<br>(0.316)          | -0.059*<br>(0.031) | -0.014***<br>(0.001) | 0.566<br>(0.321)          | -0.089**<br>(0.040) | -0.019***<br>(0.001) |

Notes: \*  $p < 0.1$ , \*\*  $p < 0.05$ , \*\*\*  $p < 0.01$ . This table reports equally-weighted averages of Cook County and New York non-evicted sample means ( $\mathbb{E}[Y|E=0]$ ), as well as equally-weighted averages of location-specific two-stage least squares (IV) and DiD estimates of the impact of eviction on tenant's labor outcomes. Outcomes are listed on the left of each row. Results are shown for 1-4 quarters (columns (1)-(3)) and for 5-8 quarters (columns (4)-(6)) after eviction case is filed. Each panel shows results for a given outcome. Below the combined estimates in each panel, we report estimates separately for each location and for the female and Black subsamples. The IV estimates are identical to those in Tables VI. The DiD regressions include individual fixed effects and time relative to filing dummies and is described in equation J.7. Standard errors are clustered at judge-year level and are shown in parentheses. The number of person-quarters appearing in the full sample of the DiD specifications are listed in brackets under standard errors in columns (3) and (6). Table H.15 reports observation counts for all IV regressions, and Table J.5 reports observation counts for all DiD regressions. Cook County results were approved for release by the U.S. Census Bureau, authorization number CBDRB-FY22-072.

**Table J.3: DiD: Impacts of Eviction on Financial Health**

|                                                      | 1-4 Quarters After Filing |                                 |                                     | 5-8 Quarters After Filing |                                |                                     |
|------------------------------------------------------|---------------------------|---------------------------------|-------------------------------------|---------------------------|--------------------------------|-------------------------------------|
|                                                      | $\mathbb{E}[Y E=0]$       | IV                              | DiD                                 | $\mathbb{E}[Y E=0]$       | IV                             | DiD                                 |
|                                                      | (1)                       | (2)                             | (3)                                 | (4)                       | (5)                            | (6)                                 |
| <b>Financial health index:</b>                       | -0.054<br>(0.737)         | -0.107*<br>(0.060)<br>[269,814] | -0.031***<br>(0.004)<br>[3,790,079] | 0.008<br>(0.747)          | -0.141<br>(0.094)<br>[271,230] | -0.037***<br>(0.005)<br>[3,790,079] |
| <i>By Location</i>                                   |                           |                                 |                                     |                           |                                |                                     |
| Cook County                                          | -0.075<br>(0.990)         | -0.202**<br>(0.102)             | -0.034***<br>(0.007)                | -0.027<br>(1.002)         | -0.230<br>(0.174)              | -0.035***<br>(0.007)                |
| New York                                             | -0.032<br>(1.091)         | -0.012<br>(0.063)               | -0.029***<br>(0.005)                | 0.043<br>(1.108)          | -0.053<br>(0.072)              | -0.040***<br>(0.007)                |
| <b>Credit score:</b>                                 | 547.59<br>(67.11)         | -7.86<br>(5.18)                 | -1.18***<br>(0.38)                  | 551.84<br>(68.61)         | -16.53**<br>(6.67)             | -1.36***<br>(0.49)                  |
| <i>By Location</i>                                   |                           |                                 |                                     |                           |                                |                                     |
| Cook County                                          | 531.94<br>(74.04)         | -8.69<br>(8.29)                 | -2.22***<br>(0.48)                  | 536.62<br>(74.56)         | -24.16**<br>(11.15)            | -1.73***<br>(0.51)                  |
| New York                                             | 563.24<br>(111.94)        | -7.03<br>(6.21)                 | -0.14<br>(0.60)                     | 567.06<br>(115.19)        | -8.90<br>(7.33)                | -1.00<br>(0.84)                     |
| <b>No open revolving account:</b>                    | 0.481<br>(0.334)          | -0.039<br>(0.025)               | 0.015***<br>(0.002)                 | 0.468<br>(0.331)          | 0.052<br>(0.051)               | 0.023***<br>(0.003)                 |
| <i>By Location</i>                                   |                           |                                 |                                     |                           |                                |                                     |
| Cook County                                          | 0.587<br>(0.491)          | -0.072*<br>(0.043)              | 0.008**<br>(0.003)                  | 0.589<br>(0.491)          | 0.080<br>(0.099)               | 0.016***<br>(0.004)                 |
| New York                                             | 0.375<br>(0.452)          | -0.006<br>(0.025)               | 0.021***<br>(0.002)                 | 0.347<br>(0.445)          | 0.024<br>(0.027)               | 0.031***<br>(0.004)                 |
| <b>Total balance: collections and delinquencies:</b> | 2,550<br>(4,099)          | 310<br>(393)                    | 98***<br>(34)                       | 2,378<br>(3,936)          | 548<br>(502)                   | 38<br>(40)                          |
| <i>By Location</i>                                   |                           |                                 |                                     |                           |                                |                                     |
| Cook County                                          | 2,759<br>(5,504)          | 735<br>(659)                    | 70<br>(49)                          | 2,516<br>(5,291)          | 739<br>(930)                   | -30<br>(49)                         |
| New York                                             | 2,342<br>(6,075)          | -115<br>(428)                   | 127***<br>(46)                      | 2,240<br>(5,829)          | 357<br>(377)                   | 105*<br>(63)                        |
| <b>Any auto loan or lease:</b>                       | 0.170<br>(0.264)          | -0.061**<br>(0.030)             | -0.007***<br>(0.002)                | 0.176<br>(0.269)          | 0.031<br>(0.036)               | -0.009***<br>(0.002)                |
| <i>By Location</i>                                   |                           |                                 |                                     |                           |                                |                                     |
| Cook County                                          | 0.197<br>(0.396)          | -0.130**<br>(0.054)             | -0.012***<br>(0.003)                | 0.198<br>(0.397)          | 0.037<br>(0.066)               | -0.016***<br>(0.003)                |
| New York                                             | 0.142<br>(0.349)          | 0.008<br>(0.027)                | -0.001<br>(0.001)                   | 0.155<br>(0.362)          | 0.025<br>(0.026)               | -0.003<br>(0.003)                   |

*Notes:* \*  $p < 0.1$ , \*\*  $p < 0.05$ , \*\*\*  $p < 0.01$ . This table reports equally-weighted averages of Cook County and New York non-evicted sample means ( $\mathbb{E}[Y|E=0]$ ), as well as equally-weighted averages of location-specific two-stage least squares (IV) and DiD estimates of the impact of eviction on tenant's financial distress outcomes. Outcomes are listed on the left of each row. Results are shown for 1-4 quarters (columns (1)-(3)) and for 5-8 quarters (columns (4)-(6)) after eviction case is filed. Each panel shows results for a given outcome. Below the combined estimates in each panel, we report estimates separately for each location and for the female and Black subsamples. The IV estimates are identical to those in Tables VII. The DiD regressions include individual fixed effects and time relative to filing dummies and is described in equation J.7. Standard errors are clustered at judge-year level and are shown in parentheses. The number of person-quarters appearing in the full sample of the DiD specifications are listed in brackets under standard errors in columns (3) and (6). Table H.15 reports observation counts for all IV regressions, and Table J.5 reports observation counts for all DiD regressions.



**Table J.4: DiD: Impacts of Eviction on Hospital Utilization**

|                                | 1-4 Quarters After Filing |                    |                     | 5-8 Quarters After Filing |                   |                     |
|--------------------------------|---------------------------|--------------------|---------------------|---------------------------|-------------------|---------------------|
|                                | $\mathbb{E}[Y E=0]$       | IV                 | DiD                 | $\mathbb{E}[Y E=0]$       | IV                | DiD                 |
|                                | (1)                       | (2)                | (3)                 | (4)                       | (5)               | (6)                 |
| Number of hospital visits      | 0.739<br>(1.321)          | 0.188**<br>(0.094) | 0.062***<br>(0.006) | 0.632<br>(1.208)          | -0.113<br>(0.142) | 0.058***<br>(0.006) |
| Number of emergency visits     | 0.588<br>(1.091)          | 0.106<br>(0.089)   | 0.057***<br>(0.006) | 0.511<br>(1.010)          | -0.065<br>(0.124) | 0.054***<br>(0.005) |
| Number of mental health visits | 0.047<br>(0.295)          | 0.054*<br>(0.030)  | 0.018***<br>(0.002) | 0.045<br>(0.346)          | -0.035<br>(0.055) | 0.014***<br>(0.002) |
|                                |                           | [179,024]          | [1,516,330]         |                           | [154,531]         | [1,516,330]         |

*Notes:* This table reports non-evicted sample means ( $\mathbb{E}[Y|E=0]$ ), as well as equally-weighted averages of location-specific two-stage least squares (IV) and DiD estimates of the impact of eviction on tenant’s health outcomes in New York only. Outcomes are listed on the left of each row. Results are shown for 1-4 quarters (columns (1)-(3)) and for 5-8 quarters (columns (4)-(6)) after eviction case is filed. Each panel shows results for a given outcome. Below the combined estimates in each panel, we report estimates separately for each location and for the female and Black subsamples. The IV estimates are identical to those in Tables VIII. The DiD regressions include individual fixed effects and time relative to filing dummies and is described in equation J.7. Standard errors are clustered at judge-year level and are shown in parentheses. The observation count for the IV specification is shown in brackets under standard errors in columns (2) and (5), and the number of person-years appearing in the full sample of the DiD specifications are listed in brackets under standard errors in columns (3) and (6).

**Table J.5: Observation Counts for DiD Regressions**

|                                               | 1-4 Quarters |             |           |               |              | 5-8 Quarters |             |           |               |               |
|-----------------------------------------------|--------------|-------------|-----------|---------------|--------------|--------------|-------------|-----------|---------------|---------------|
|                                               | All<br>(1)   | Cook<br>(2) | NY<br>(3) | Female<br>(4) | Black<br>(5) | All<br>(6)   | Cook<br>(7) | NY<br>(8) | Female<br>(9) | Black<br>(10) |
| <b>Housing outcomes:</b>                      |              |             |           |               |              |              |             |           |               |               |
| Not at eviction address:                      | 2,110,008    | 1,282,000   | 828,008   | 1,381,474     | 1,278,004    | 2,110,008    | 1,282,000   | 828,008   | 1,381,474     | 1,278,004     |
| Emergency shelter:                            | 1,766,585    | 222,000     | 1,544,585 | 1,226,834     | 1,034,574    |              |             |           |               |               |
| Any homelessness services:                    | 1,766,585    | 222,000     | 1,544,585 | 1,226,834     | 1,034,574    |              |             |           |               |               |
| <b>Labor market outcomes:</b>                 |              |             |           |               |              |              |             |           |               |               |
| Earnings:                                     | 15,127,852   | 10,690,000  | 4,437,852 | 9,704,278     | 9,564,675    | 15,127,852   | 10,690,000  | 4,437,852 | 9,704,278     | 9,564,675     |
| Employment:                                   | 15,457,852   | 11,020,000  | 4,437,852 | 9,880,278     | 9,737,675    | 15,457,852   | 11,020,000  | 4,437,852 | 9,880,278     | 9,737,675     |
| <b>Financial health outcomes:</b>             |              |             |           |               |              |              |             |           |               |               |
| Financial health index:                       | 3,790,079    | 999,753     | 2,790,326 |               |              | 3,790,079    | 999,753     | 2,790,326 |               |               |
| Credit score:                                 | 3,892,074    | 1,101,734   | 2,790,340 |               |              | 3,892,074    | 1,101,734   | 2,790,340 |               |               |
| No open revolving account:                    | 3,968,233    | 1,114,314   | 2,853,919 |               |              | 3,968,233    | 1,114,314   | 2,853,919 |               |               |
| Total balance: collections and delinquencies: | 3,793,010    | 1,002,677   | 2,790,333 |               |              | 3,793,010    | 1,002,677   | 2,790,333 |               |               |
| Any auto loan or lease:                       | 3,904,646    | 1,114,314   | 2,790,332 |               |              | 3,904,646    | 1,114,314   | 2,790,332 |               |               |

*Notes:* This table shows the observation counts for all outcomes and samples used in the DiD specifications, for 1-4 quarters (columns (1)-(5)) and 5-8 quarters (columns (6)-(10)) after eviction case filing. Observation counts are in person-years for housing outcomes, and in person-quarters for labor market and financial health outcomes. Observation counts for female and Black subgroups are counts across both Cook County and New York. Observation counts for Cook County are rounded in accordance with Census Bureau disclosure requirements for housing and labor market outcomes. Cook County results were approved for release by the U.S. Census Bureau, authorization number CBDRB-FY22-072.
